# Supplementary material for: Multinuclear beryllium amide and imide complexes: structure, properties and bonding
Source: Royal Society of Chemistry journal article supplement (doi:10.1039/d4dt02269f), 2024-01-01
Supplement: d4dt02269f1.pdf [file d4dt02269f1.pdf]

*Electronic Supplementary Information for*  
**Multinuclear beryllium amide and imide complexes:  
structure, properties and bonding**

Deniz F. Bekiş,<sup>a</sup> Lewis R. Thomas-Hargreaves,<sup>a</sup> Sergei I. Ivlev<sup>a</sup> and Magnus R. Buchner<sup>\*a</sup>

a) Fachbereich Chemie, Philipps-Universität Marburg, 35043 Marburg, Germany, E-mail:  
magnus.buchner@chemie.uni-marburg.de (M.R.B.)

|                                          |    |
|------------------------------------------|----|
| Table of Contents                        |    |
| Crystallographic Details .....           | 2  |
| NMR Spectra .....                        | 4  |
| IR Spectra.....                          | 15 |
| Computational results.....               | 18 |
| Coordinates of Optimized Structures..... | 43 |

## Crystallographic Details

**Table S1:** Crystal data and details of the structure determination for [Be(HNMes)<sub>2</sub>]<sub>3</sub> (1), [(py)<sub>2</sub>Be(HNMes)<sub>2</sub>] (2) and [Be(HNDipp)<sub>2</sub>]<sub>2</sub> (3).

|                                                          | [Be(HNMes) <sub>2</sub> ] <sub>3</sub> (1) · C <sub>6</sub> H <sub>6</sub>                     | [(py) <sub>2</sub> Be(HNMes) <sub>2</sub> ] (2)                  | [Be(HNDipp) <sub>2</sub> ] <sub>2</sub> (3)                       |
|----------------------------------------------------------|------------------------------------------------------------------------------------------------|------------------------------------------------------------------|-------------------------------------------------------------------|
| Empirical formula                                        | C <sub>54</sub> H <sub>72</sub> Be <sub>3</sub> N <sub>6</sub> , C <sub>6</sub> H <sub>6</sub> | C <sub>28</sub> H <sub>34</sub> BeN <sub>4</sub>                 | C <sub>48</sub> H <sub>72</sub> Be <sub>2</sub> N <sub>4</sub>    |
| Relative molecular mass                                  | 910.31                                                                                         | 435.60                                                           | 723.11                                                            |
| Crystal system                                           | triclinic                                                                                      | monoclinic                                                       | monoclinic                                                        |
| Space group (No.)                                        | <i>P</i> $\bar{1}$ (2)                                                                         | <i>I</i> 2/ <i>a</i> (15)                                        | <i>P</i> 2 <sub>1</sub> / <i>c</i> (14)                           |
| Radiation / Å                                            | 1.54186                                                                                        | 1.54186                                                          | 1.54178                                                           |
| <i>a</i> / Å                                             | 14.2365(15)                                                                                    | 16.1582(15)                                                      | 9.5804(3)                                                         |
| <i>b</i> / Å                                             | 14.6407(15)                                                                                    | 8.6300(5)                                                        | 16.0927(5)                                                        |
| <i>c</i> / Å                                             | 15.7210(18)                                                                                    | 17.5982(15)                                                      | 14.6676(5)                                                        |
| $\alpha$ / deg                                           | 63.743(8)                                                                                      | 90                                                               | 90                                                                |
| $\beta$ / deg                                            | 71.969(9)                                                                                      | 95.030(7)                                                        | 102.993(2)                                                        |
| $\gamma$ / deg                                           | 72.777(8)                                                                                      | 90                                                               | 90                                                                |
| <i>V</i> / Å <sup>3</sup>                                | 2745.2(6)                                                                                      | 2444.5(3)                                                        | 2203.47(12)                                                       |
| <i>Z</i>                                                 | 2                                                                                              | 4                                                                | 2                                                                 |
| <i>F</i> (000) / <i>e</i>                                | 984                                                                                            | 936                                                              | 792                                                               |
| $\rho_{calc.}$ / g·cm <sup>-3</sup>                      | 1.101                                                                                          | 1.184                                                            | 1.090                                                             |
| $\mu$ / mm <sup>-1</sup>                                 | 0.476                                                                                          | 0.531                                                            | 0.462                                                             |
| $\vartheta$ range / °                                    | 3.205 – 76.230                                                                                 | 5.046 – 76.127                                                   | 4.137 – 74.576                                                    |
| Range of Miller indices                                  | -17 ≤ <i>h</i> ≤ 17<br>-17 ≤ <i>k</i> ≤ 18<br>-19 ≤ <i>l</i> ≤ 15                              | -20 ≤ <i>h</i> ≤ 18<br>-10 ≤ <i>k</i> ≤ 6<br>-21 ≤ <i>l</i> ≤ 22 | -11 ≤ <i>h</i> ≤ 11<br>-20 ≤ <i>k</i> ≤ 20<br>-17 ≤ <i>l</i> ≤ 18 |
| Reflections collected, unique                            | 67425, 11226                                                                                   | 15241, 2534                                                      | 68071, 4499                                                       |
| Restraints, parameters                                   | 2052, 927                                                                                      | 0, 157                                                           | 0, 258                                                            |
| <i>R</i> <sub>int</sub>                                  | 0.0661                                                                                         | 0.0257                                                           | 0.0482                                                            |
| <i>R</i> <sub>1</sub> ( <i>I</i> ≥ 2σ( <i>I</i> ))       | 0.0497                                                                                         | 0.0380                                                           | 0.0362                                                            |
| <i>R</i> <sub>1</sub> (all data)                         | 0.0942                                                                                         | 0.0482                                                           | 0.0405                                                            |
| <i>wR</i> <sub>2</sub> ( <i>I</i> ≥ 2σ( <i>I</i> ))      | 0.1183                                                                                         | 0.1043                                                           | 0.0946                                                            |
| <i>wR</i> <sub>2</sub> (all data)                        | 0.1377                                                                                         | 0.1085                                                           | 0.0978                                                            |
| <i>S</i>                                                 | 0.838                                                                                          | 1.064                                                            | 1.047                                                             |
| $\Delta\rho_{min}, \Delta\rho_{max}$ / e·Å <sup>-3</sup> | -0.204, 0.201                                                                                  | -0.157, 0.242                                                    | -0.180, 0.282                                                     |

**Table S2:** Crystal data and details of the structure determination for [Be(NPh<sub>2</sub>)(μ<sub>2</sub>-HNDipp)]<sub>2</sub> (**4**) and [Be(NCPh<sub>2</sub>)<sub>2</sub>]<sub>3</sub> (**5**).

|                                                          | [Be(NPh <sub>2</sub> )(μ <sub>2</sub> -HNDipp)] <sub>2</sub> ( <b>4</b> ) | [Be(NCPh <sub>2</sub> ) <sub>2</sub> ] <sub>3</sub> ( <b>5</b> )    |
|----------------------------------------------------------|---------------------------------------------------------------------------|---------------------------------------------------------------------|
| Empirical formula                                        | C <sub>48</sub> H <sub>56</sub> Be <sub>2</sub> N <sub>4</sub>            | C <sub>78</sub> H <sub>60</sub> Be <sub>3</sub> N <sub>6</sub>      |
| Relative molecular mass                                  | 706.98                                                                    | 1108.35                                                             |
| Crystal system                                           | monoclinic                                                                | triclinic                                                           |
| Space group (No.)                                        | <i>P</i> 2 <sub>1</sub> / <i>c</i> (14)                                   | <i>P</i> $\bar{1}$ (2)                                              |
| Radiation / Å                                            | 1.54186                                                                   | 1.54186                                                             |
| <i>a</i> / Å                                             | 9.4884(9)                                                                 | 9.9415(6)                                                           |
| <i>b</i> / Å                                             | 9.8022(7)                                                                 | 15.0952(7)                                                          |
| <i>c</i> / Å                                             | 22.2345(19)                                                               | 23.1922(13)                                                         |
| $\alpha$ / deg                                           | 90                                                                        | 71.835(4)                                                           |
| $\beta$ / deg                                            | 99.949(7)                                                                 | 87.988(6)                                                           |
| $\gamma$ / deg                                           | 90                                                                        | 71.142(4)                                                           |
| <i>V</i> / Å <sup>3</sup>                                | 2036.9(3)                                                                 | 3121.1(3)                                                           |
| <i>Z</i>                                                 | 2                                                                         | 2                                                                   |
| <i>F</i> (000) / <i>e</i>                                | 760                                                                       | 1164                                                                |
| $\rho_{calc.}$ / g·cm <sup>-3</sup>                      | 1.153                                                                     | 1.179                                                               |
| $\mu$ / mm <sup>-1</sup>                                 | 0.499                                                                     | 0.522                                                               |
| $\vartheta$ range / °                                    | 4.037 – 76.128                                                            | 3.243 – 70.070                                                      |
| Range of Miller indices                                  | $-6 \leq h \leq 11$<br>$-12 \leq k \leq 12$<br>$-26 \leq l \leq 27$       | $-12 \leq h \leq 5$<br>$-18 \leq k \leq 18$<br>$-28 \leq l \leq 28$ |
| Reflections collected, unique                            | 24532, 4152                                                               | 70021, 11726                                                        |
| Restraints, parameters                                   | 69, 283                                                                   | 0, 785                                                              |
| <i>R</i> <sub>int</sub>                                  | 0.0535                                                                    | 0.0285                                                              |
| <i>R</i> <sub>1</sub> ( <i>I</i> ≥ 2σ( <i>I</i> ))       | 0.0518                                                                    | 0.055                                                               |
| <i>R</i> <sub>1</sub> (all data)                         | 0.0640                                                                    | 0.067                                                               |
| <i>wR</i> <sub>2</sub> ( <i>I</i> ≥ 2σ( <i>I</i> ))      | 0.1488                                                                    | 0.157                                                               |
| <i>wR</i> <sub>2</sub> (all data)                        | 0.1578                                                                    | 0.165                                                               |
| <i>S</i>                                                 | 1.061                                                                     | 1.086                                                               |
| $\Delta\rho_{min}, \Delta\rho_{max}$ / e·Å <sup>-3</sup> | -0.223, 0.288                                                             | -0.236, 0.315                                                       |

## NMR Spectra

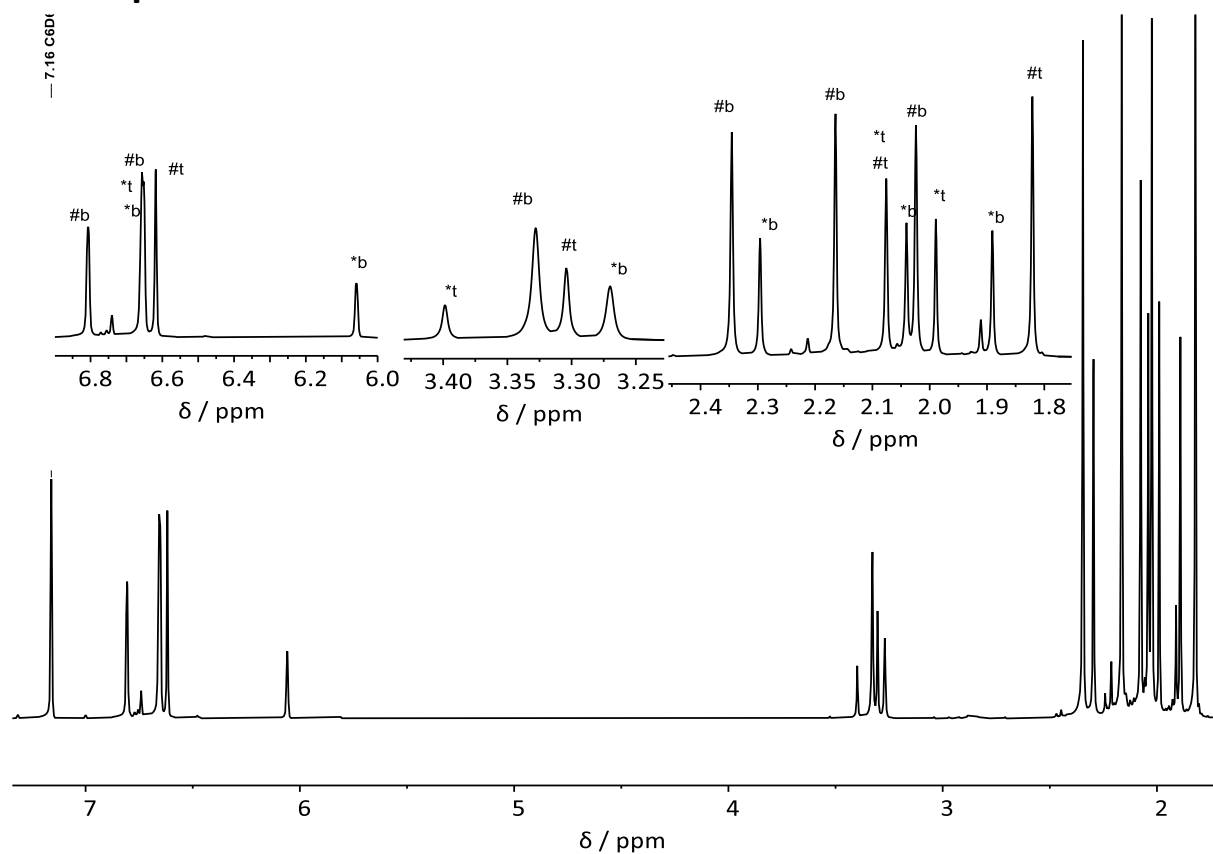

**Figure S1.**  $^1\text{H}$  NMR spectrum of  $[\text{Be}(\text{HNMe}_2)_2]_3$  (1) in  $\text{C}_6\text{D}_6$ . The major isomer is annotated with a hash while for the minor one an asterisk is used. Bridging and terminal HNMe<sub>2</sub> units are marked with “b” and “t”, respectively.

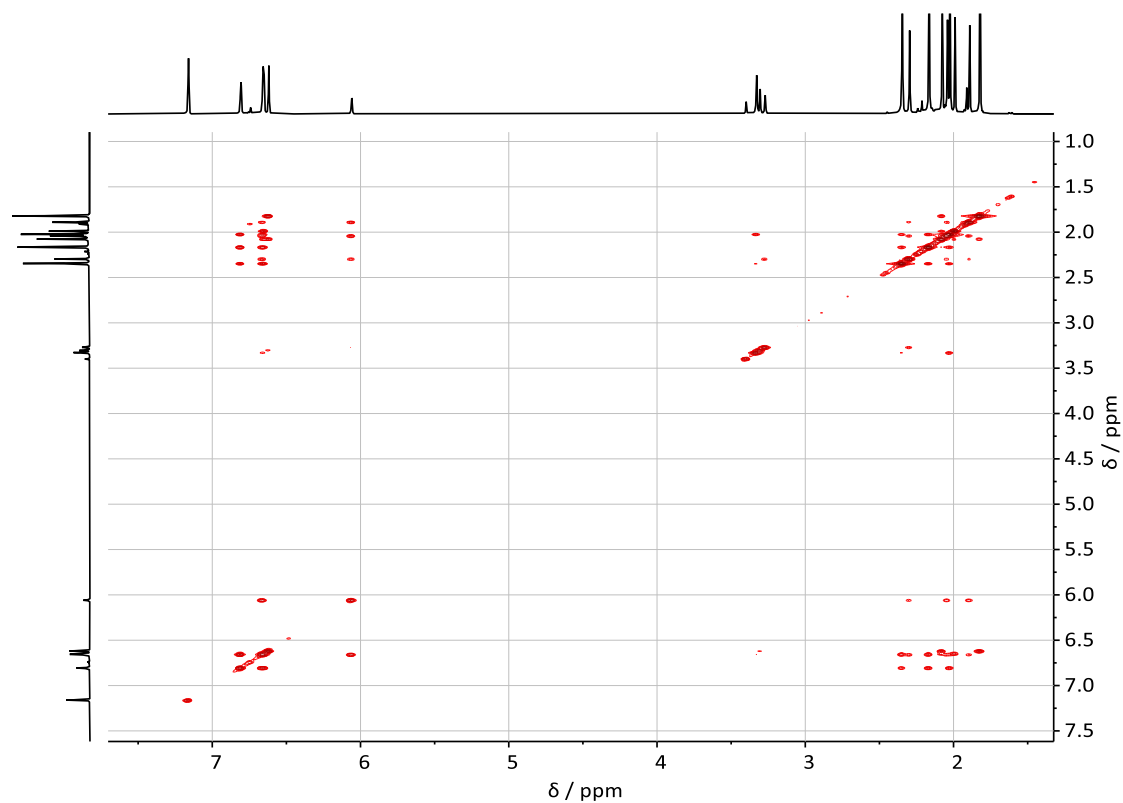

**Figure S2.**  $^1\text{H}$ - $^1\text{H}$  COSY NMR spectrum of  $[\text{Be}(\text{HNMe}_2)_2]_3$  (1) in  $\text{C}_6\text{D}_6$ .

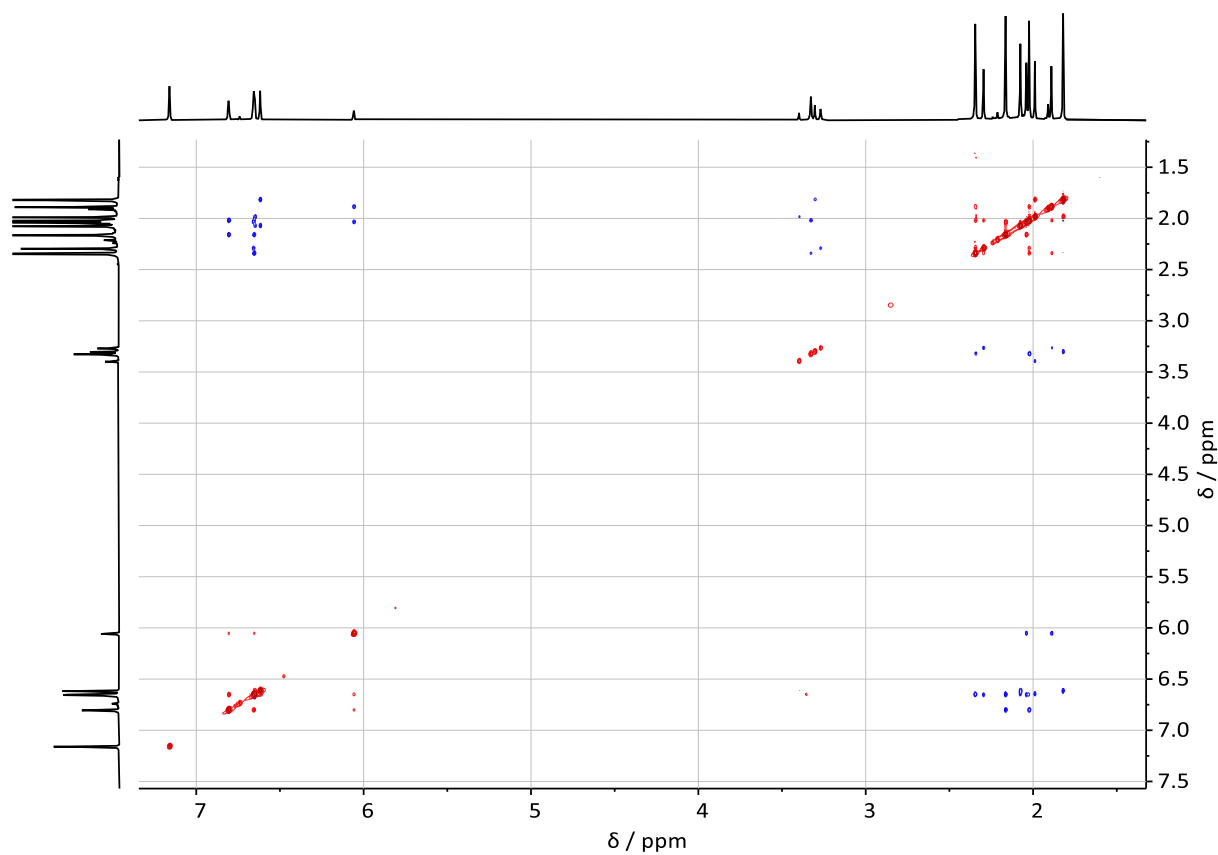

**Figure S3.** Phaseselective  $^1\text{H}$ - $^1\text{H}$  NOESY NMR spectrum of  $[\text{Be}(\text{HNMe})_2]_3$  (**1**) in  $\text{C}_6\text{D}_6$ .

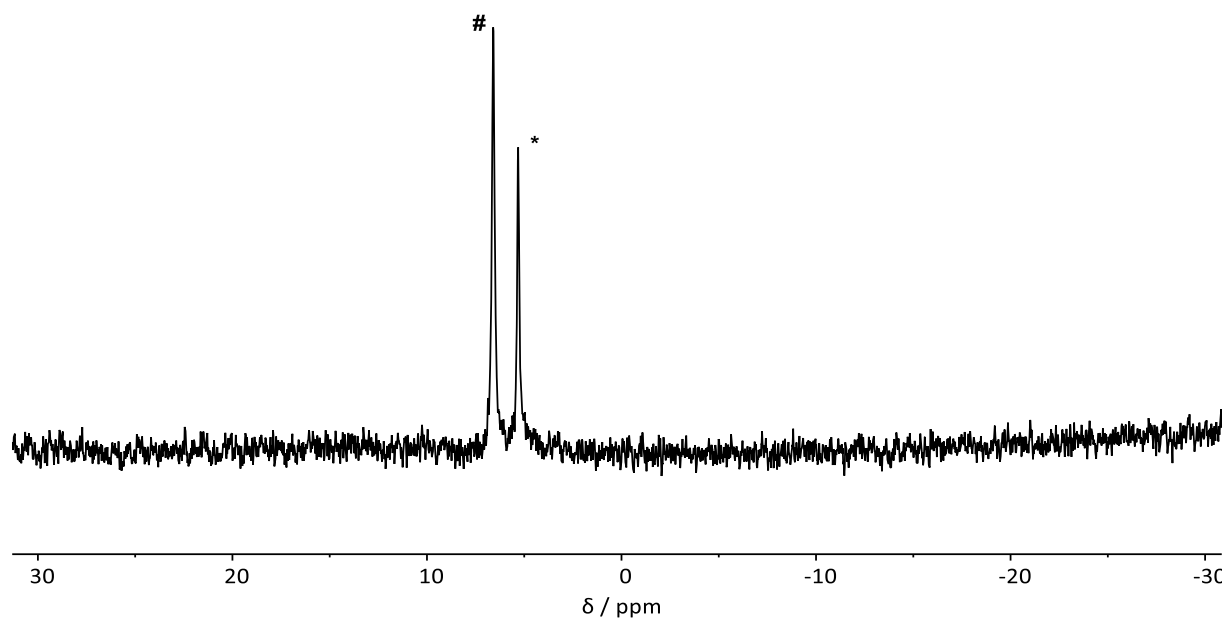

**Figure S4.**  $^9\text{Be}$  NMR spectrum of  $[\text{Be}(\text{HNMe})_2]_3$  (**1**) in  $\text{C}_6\text{D}_6$ . The major isomer is annotated with a hash while for the minor one an asterisk is used.

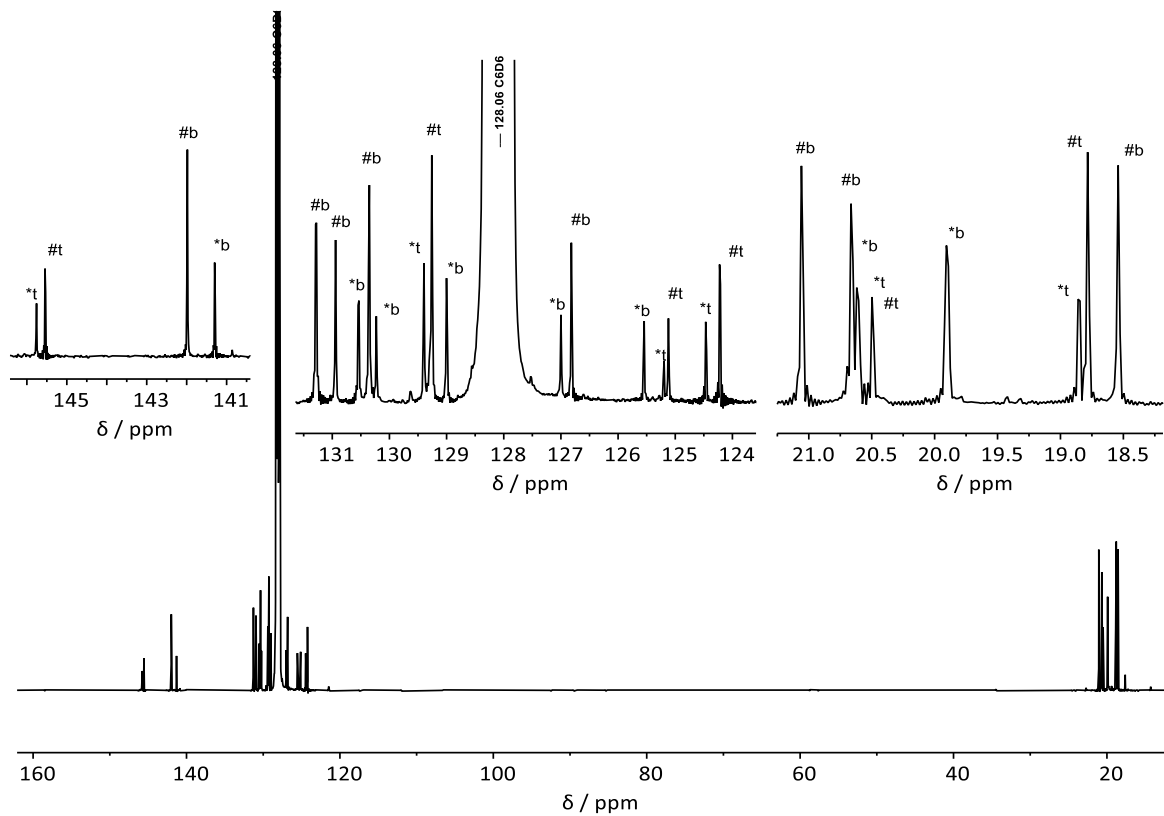

**Figure S5.**  $^{13}\text{C}$  NMR spectrum of  $[\text{Be}(\text{HNMes})_2]_3$  (**1**) in  $\text{C}_6\text{D}_6$ . The major isomer is annotated with a hash while for the minor one an asterisk is used. Bridging and terminal HNMes units are marked with “b” and “t”, respectively.

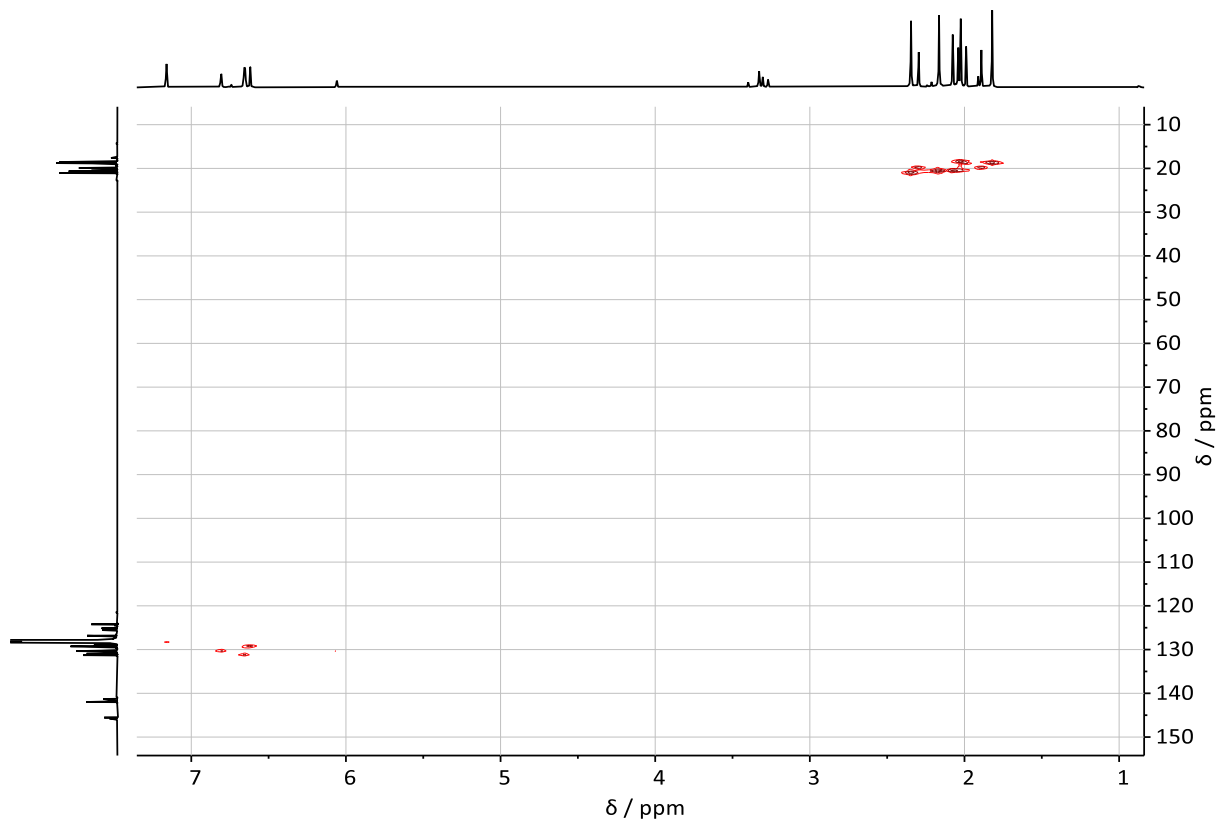

**Figure S6.**  $^1\text{H}/^{13}\text{C}$  HMQC NMR spectrum of  $[\text{Be}(\text{HNMes})_2]_3$  (**1**) in  $\text{C}_6\text{D}_6$ .

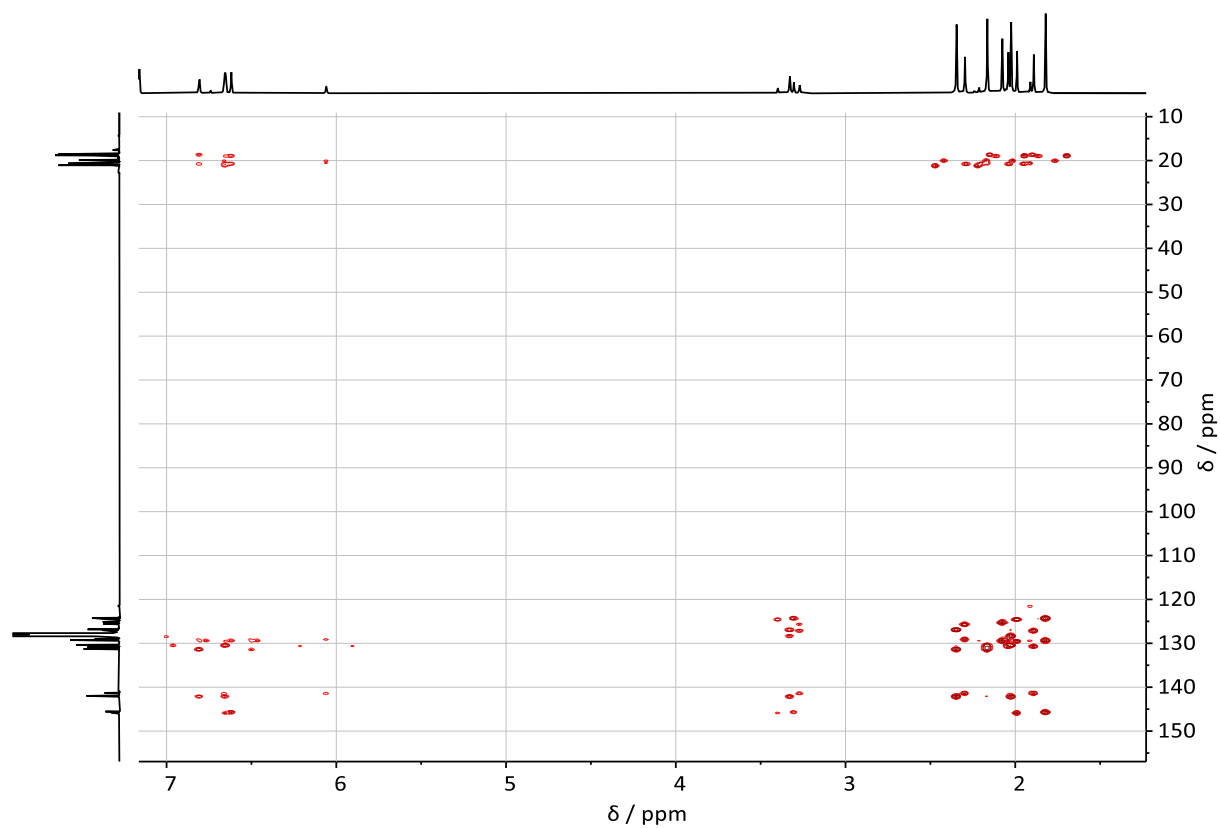

Figure S7.  $^{13}\text{C}$  HMBC NMR spectrum of  $[\text{Be}(\text{HNMe})_2]_3$  (**1**) in  $\text{C}_6\text{D}_6$ .

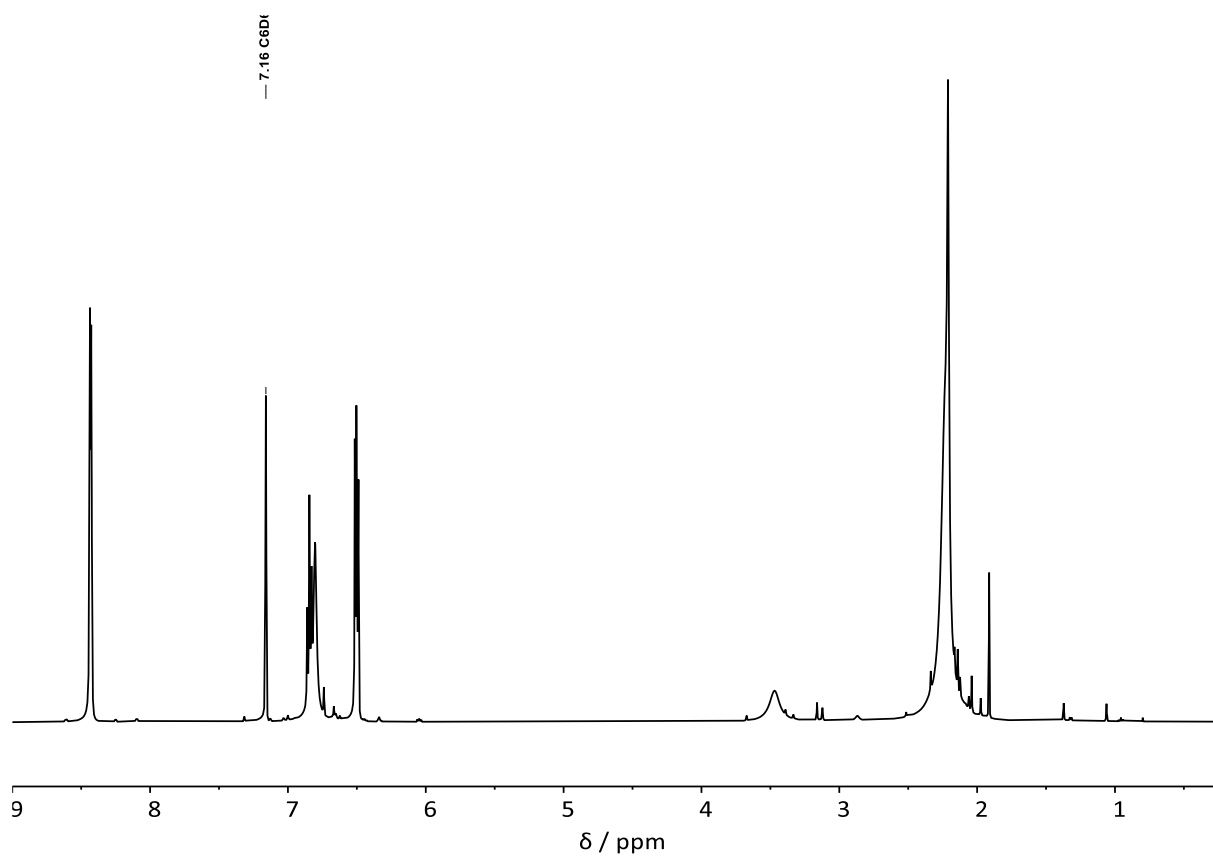

Figure S8.  $^1\text{H}$  NMR spectrum of  $[(\text{py})_2\text{Be}(\text{HNMe})_2]$  (**2**) in  $\text{C}_6\text{D}_6$ .

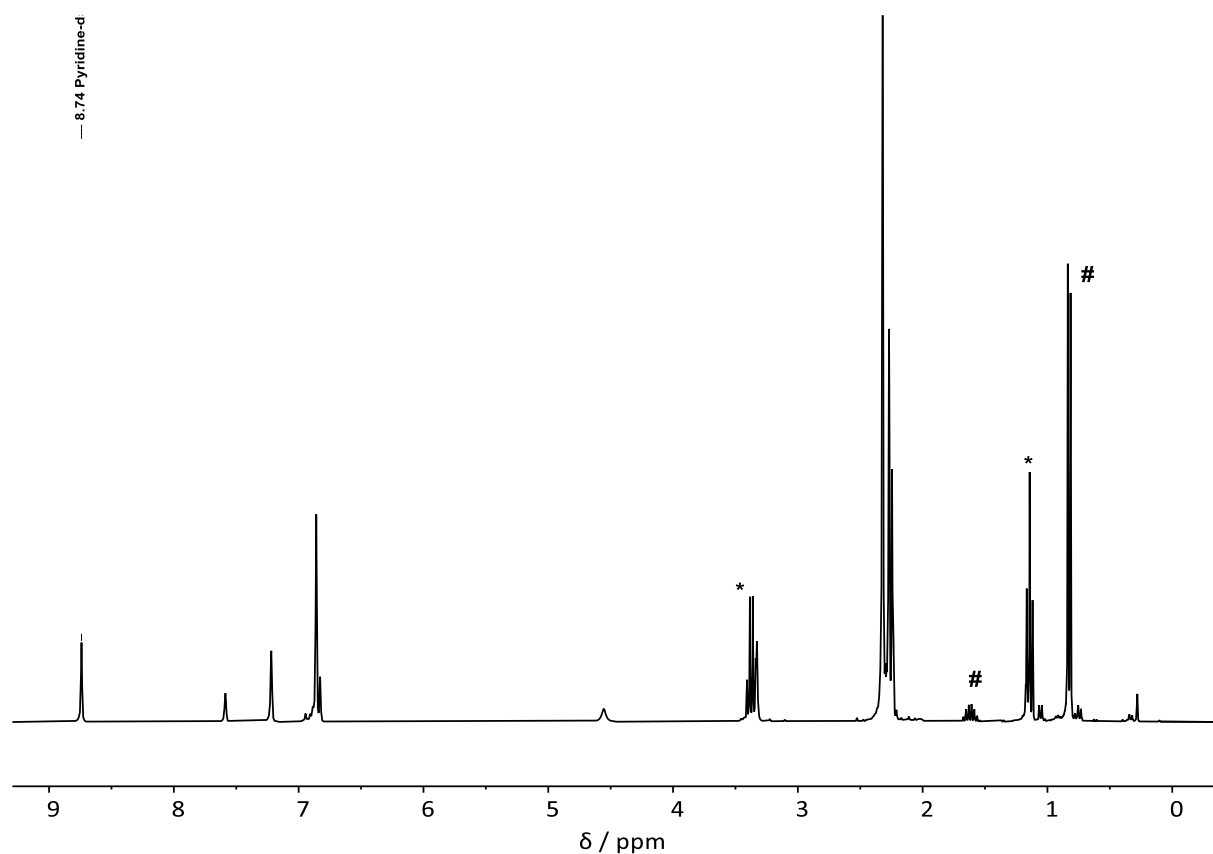

**Figure S9.**  $^1\text{H}$  NMR spectrum of  $[(\text{py})_2\text{Be}(\text{HNMes})_2]$  (**2**) in  $\text{py-d}_5$ . The signals denoted with an asterisk originate from  $\text{Et}_2\text{O}$  and those marked with a hash from isobutene.

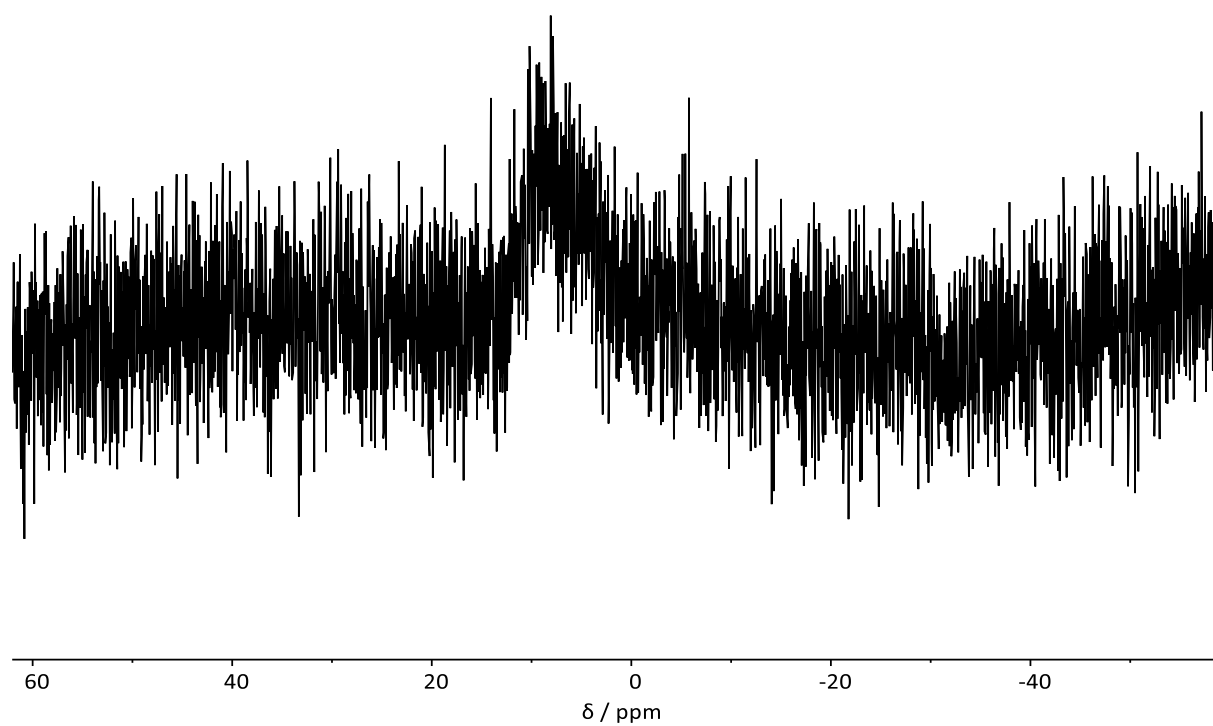

**Figure S10.**  $^9\text{Be}$  NMR spectrum of  $[(\text{py})_2\text{Be}(\text{HNMes})_2]$  (**2**) in  $\text{C}_6\text{D}_6$ .



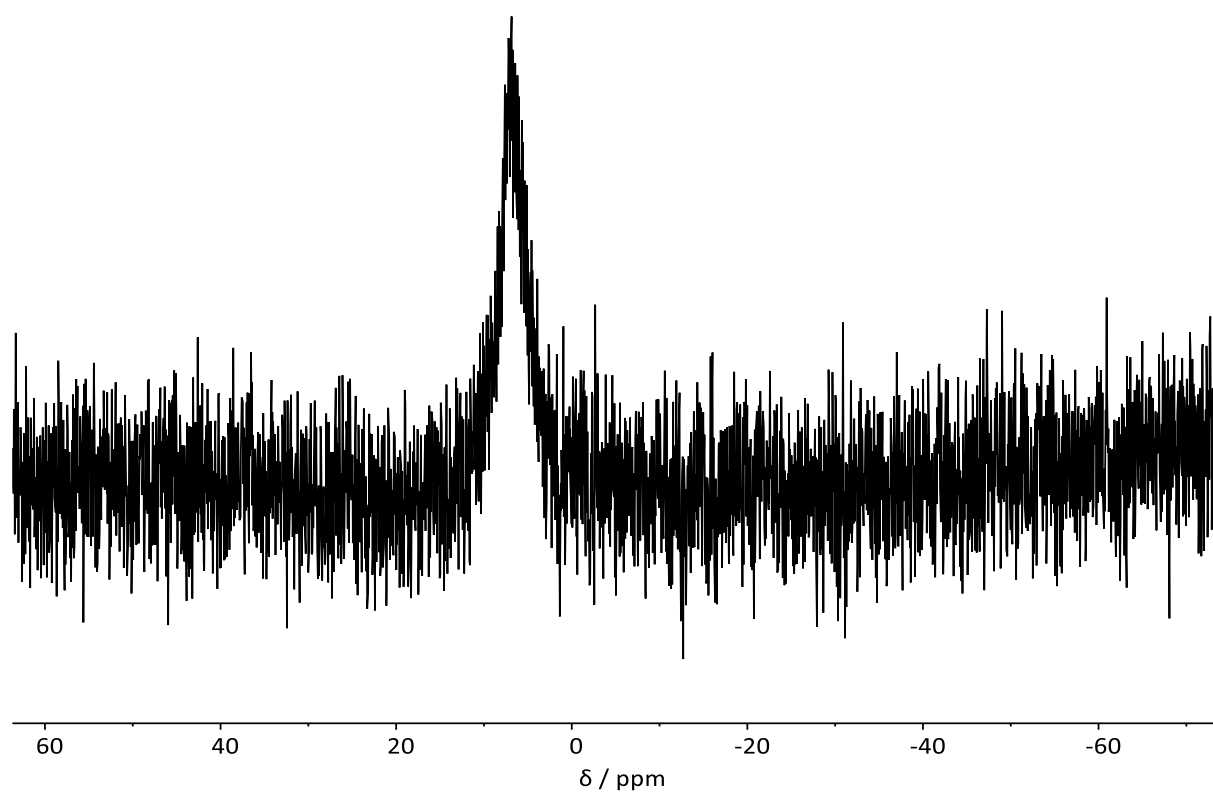

**Figure S11.**  $^9\text{Be}$  NMR spectrum of  $[(\text{py})_2\text{Be}(\text{HNMes})_2]$  (**2**) in  $\text{py-d}_5$ .

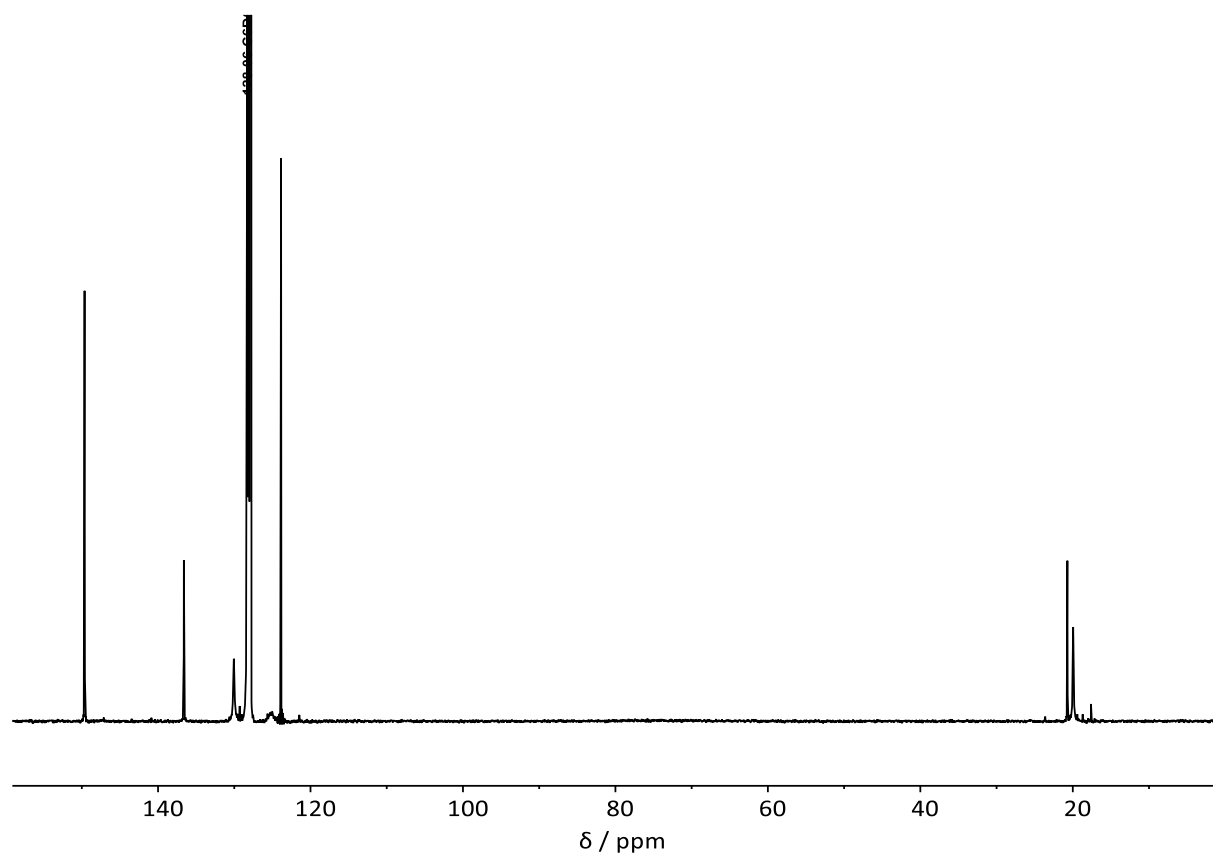

**Figure S12.**  $^{13}\text{C}$  NMR spectrum of  $[(\text{py})_2\text{Be}(\text{HNMes})_2]$  (**2**) in  $\text{C}_6\text{D}_6$ .

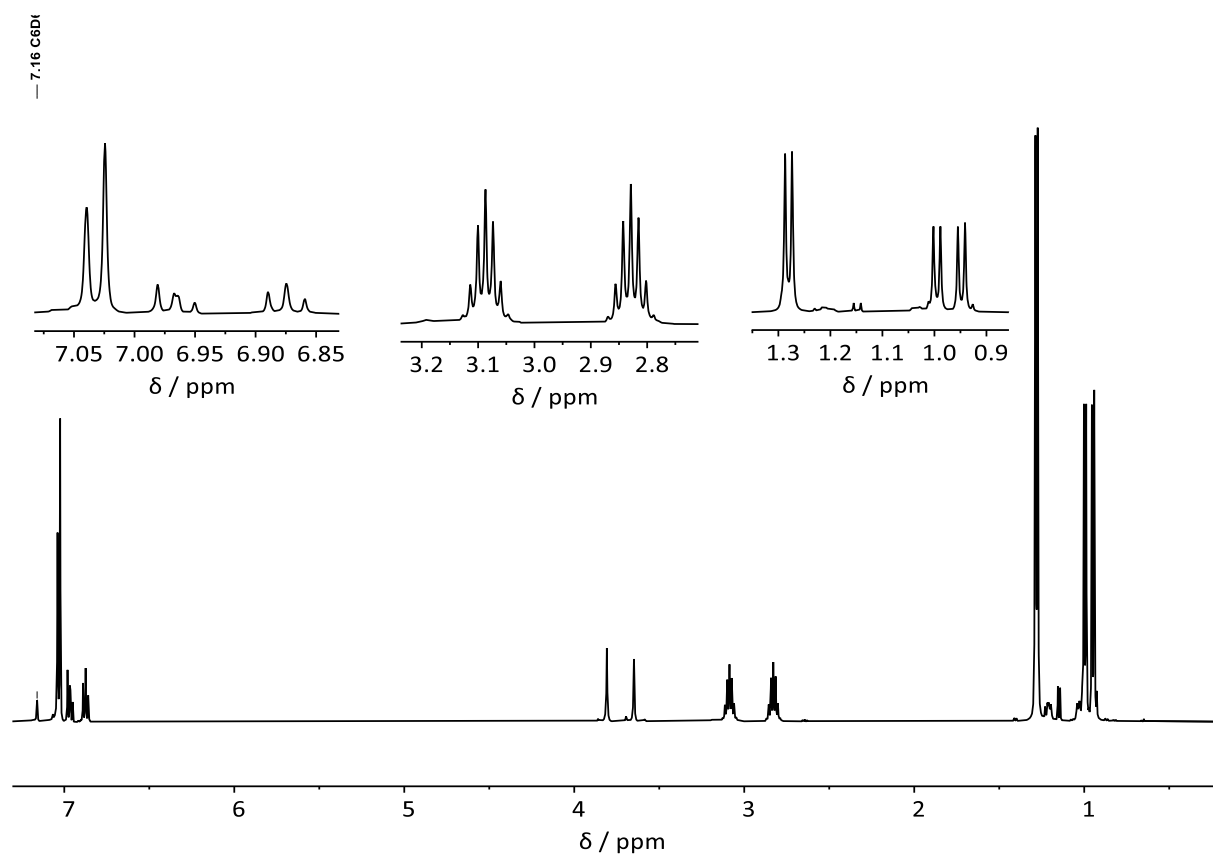

**Figure S13.**  $^1\text{H}$  NMR spectrum of  $[\text{Be}(\text{HNDipp})_2]_2$  (**3**) in  $\text{C}_6\text{D}_6$ .

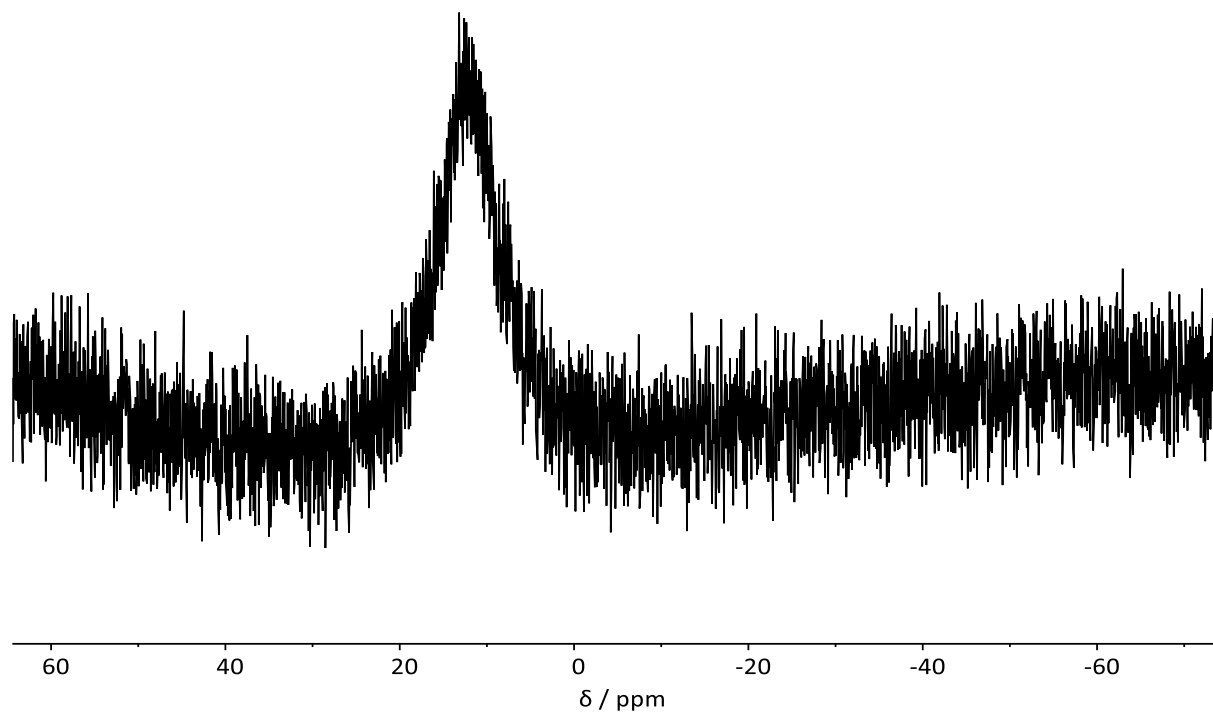

**Figure S14.**  $^9\text{Be}$  NMR spectrum of  $[\text{Be}(\text{HNDipp})_2]_2$  (**3**) in  $\text{C}_6\text{D}_6$ .

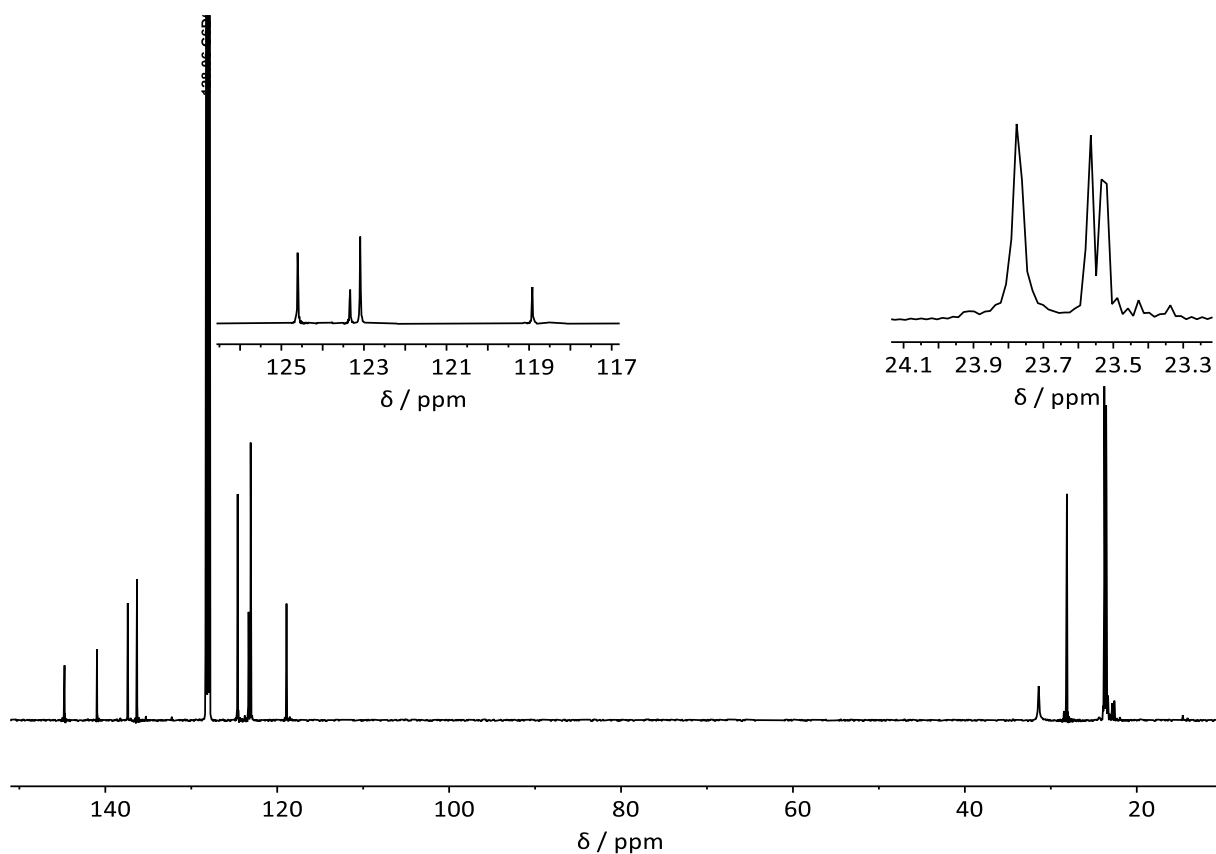

Figure S15.  $^{13}\text{C}$  NMR spectrum of  $[\text{Be}(\text{HNDipp})_2]_2$  (**3**) in  $\text{C}_6\text{D}_6$ .

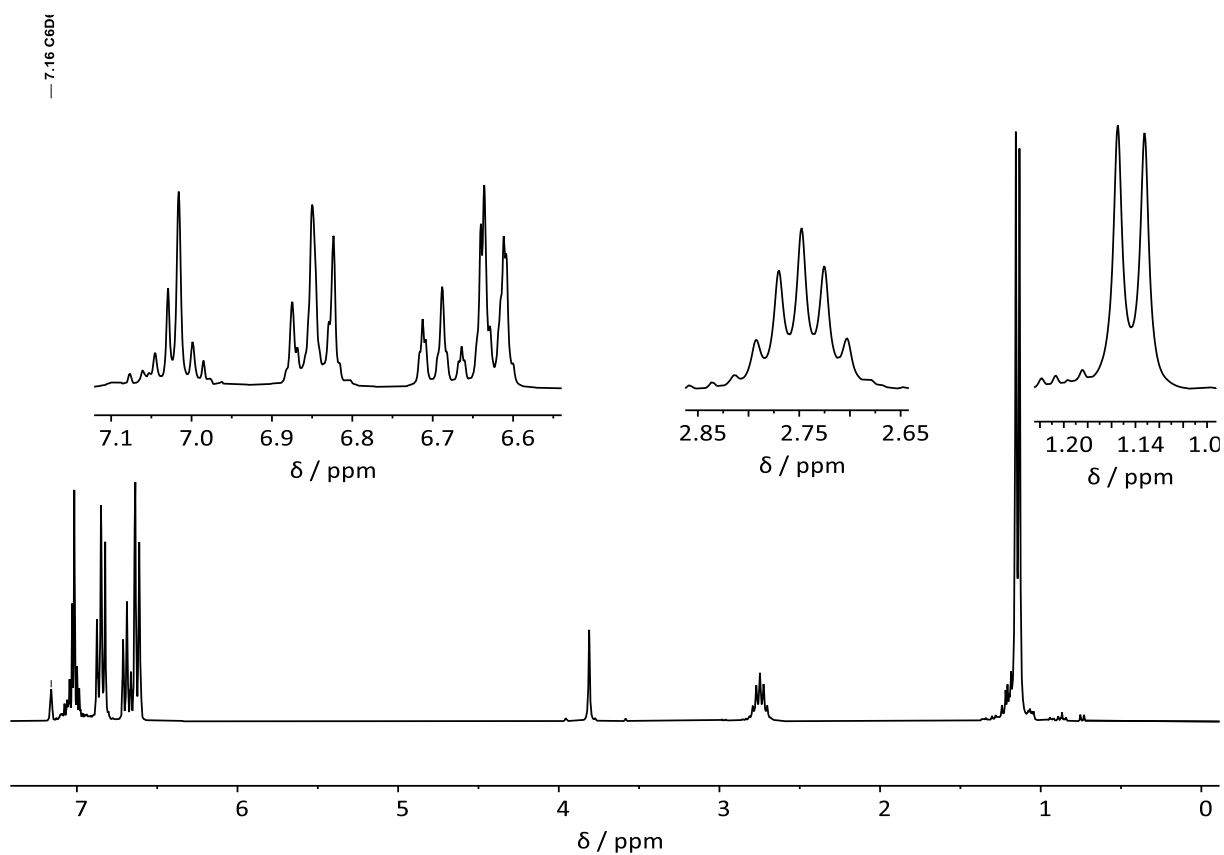

Figure S16.  $^1\text{H}$  NMR spectrum of  $[\text{Be}(\text{NPh}_2)(\mu_2\text{-HNDipp})]_2$  (**4**) in  $\text{C}_6\text{D}_6$ .

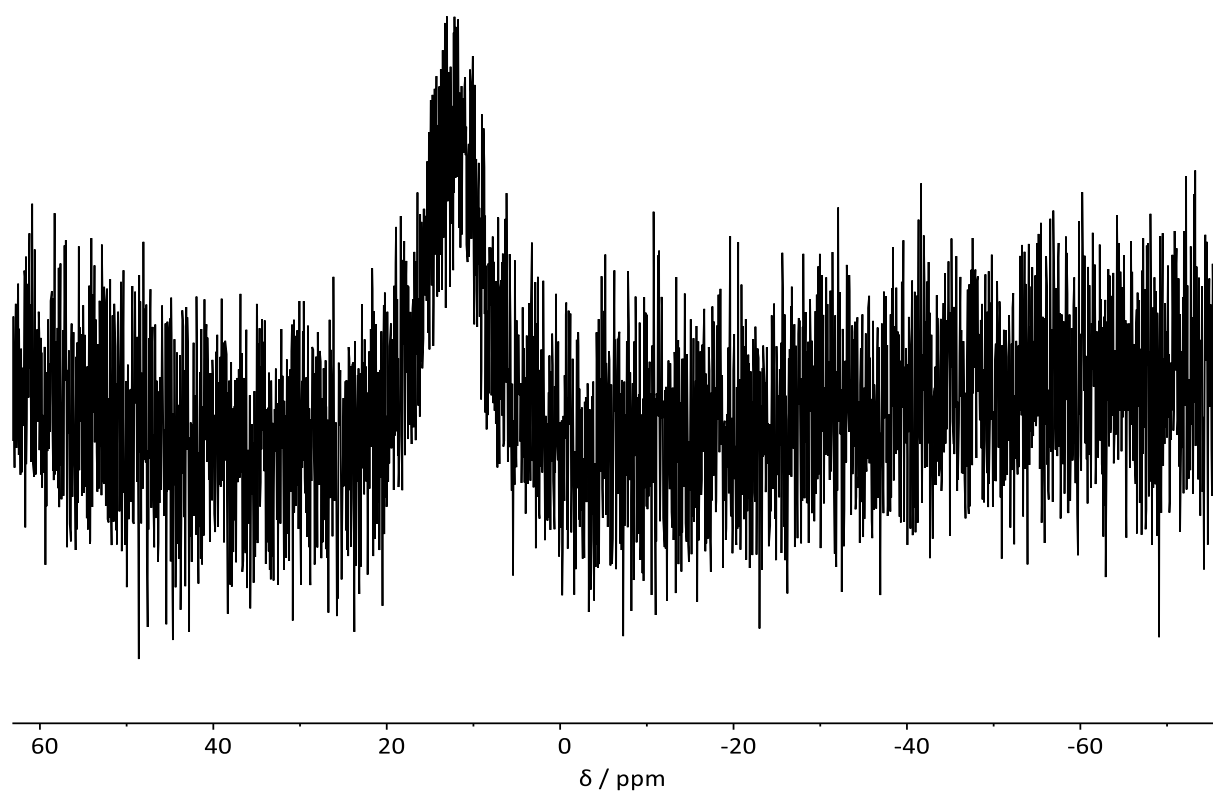

**Figure S17.**  $^9\text{Be}$  NMR spectrum of  $[\text{Be}(\text{NPh}_2)(\mu_2\text{-HNDipp})]_2$  (**4**) in  $\text{C}_6\text{D}_6$ .

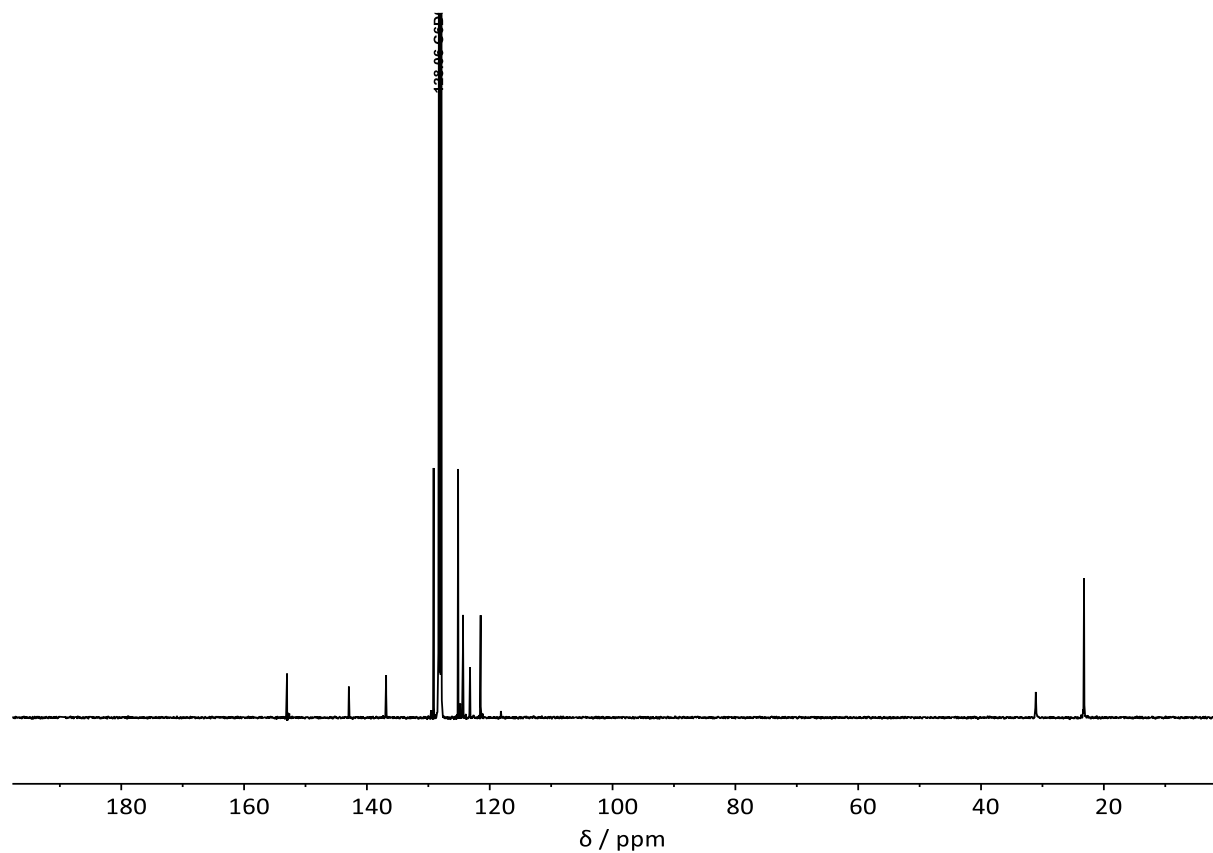

**Figure S18.**  $^{13}\text{C}$  NMR spectrum of  $[\text{Be}(\text{NPh}_2)(\mu_2\text{-HNDipp})]_2$  (**4**) in  $\text{C}_6\text{D}_6$ .

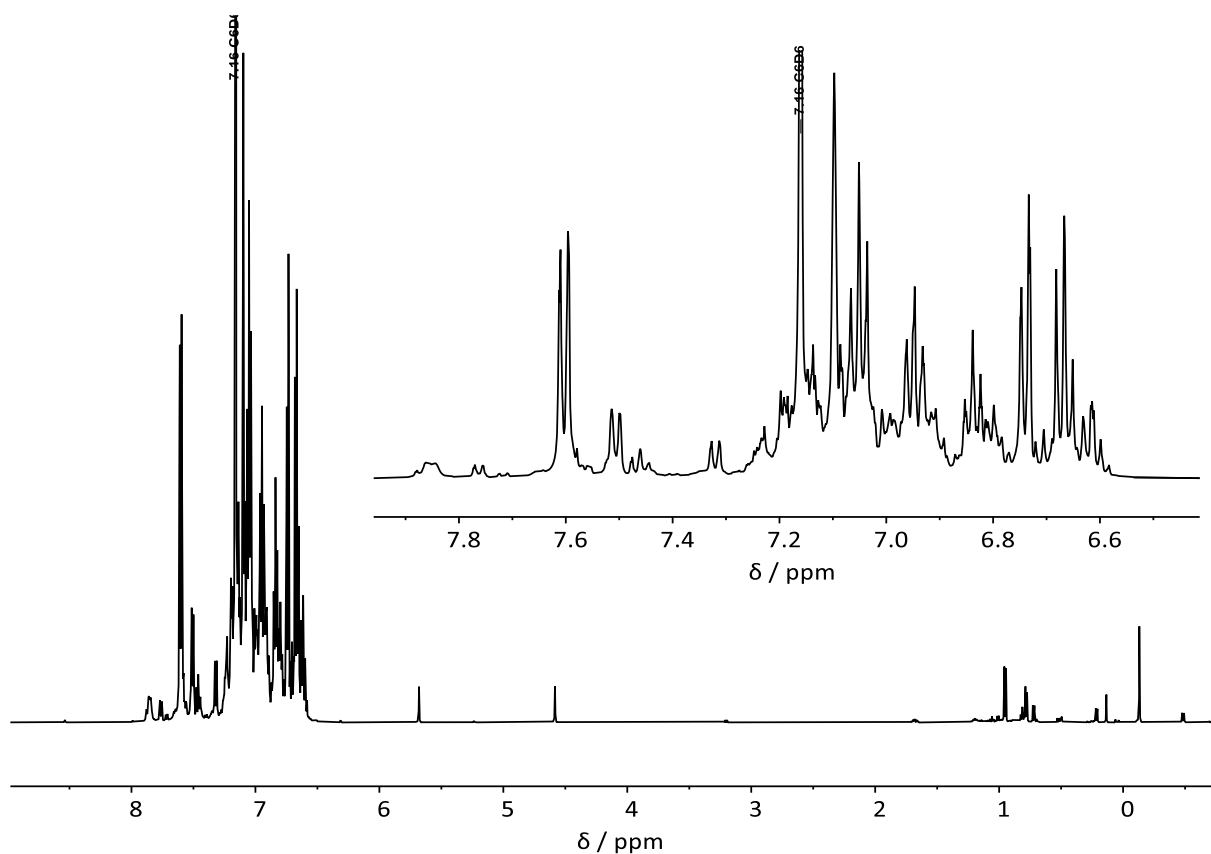

Figure S19.  $^1\text{H}$  NMR spectrum of  $[\text{Be}(\text{NCPh}_2)_2]_3$  (5) in  $\text{C}_6\text{D}_6$ .

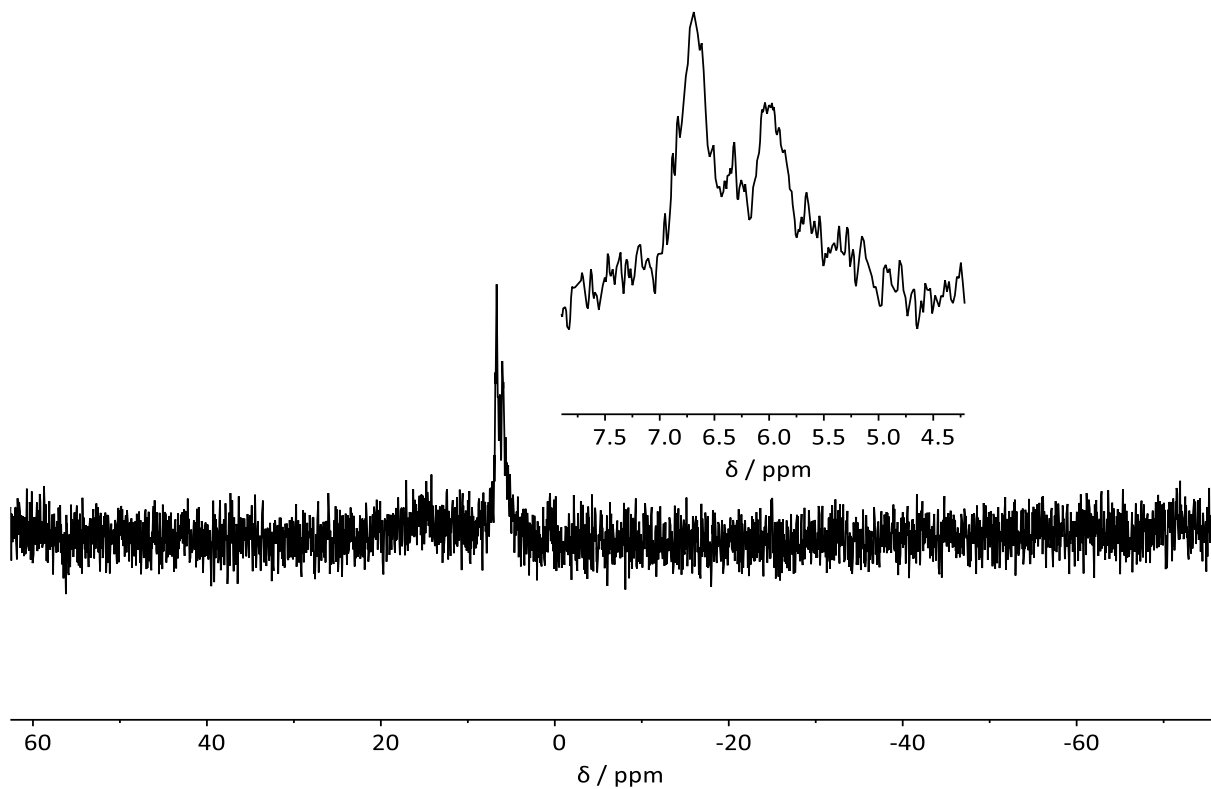

Figure S20.  $^9\text{Be}$  NMR spectrum of  $[\text{Be}(\text{NCPh}_2)_2]_3$  (5) in  $\text{C}_6\text{D}_6$ .

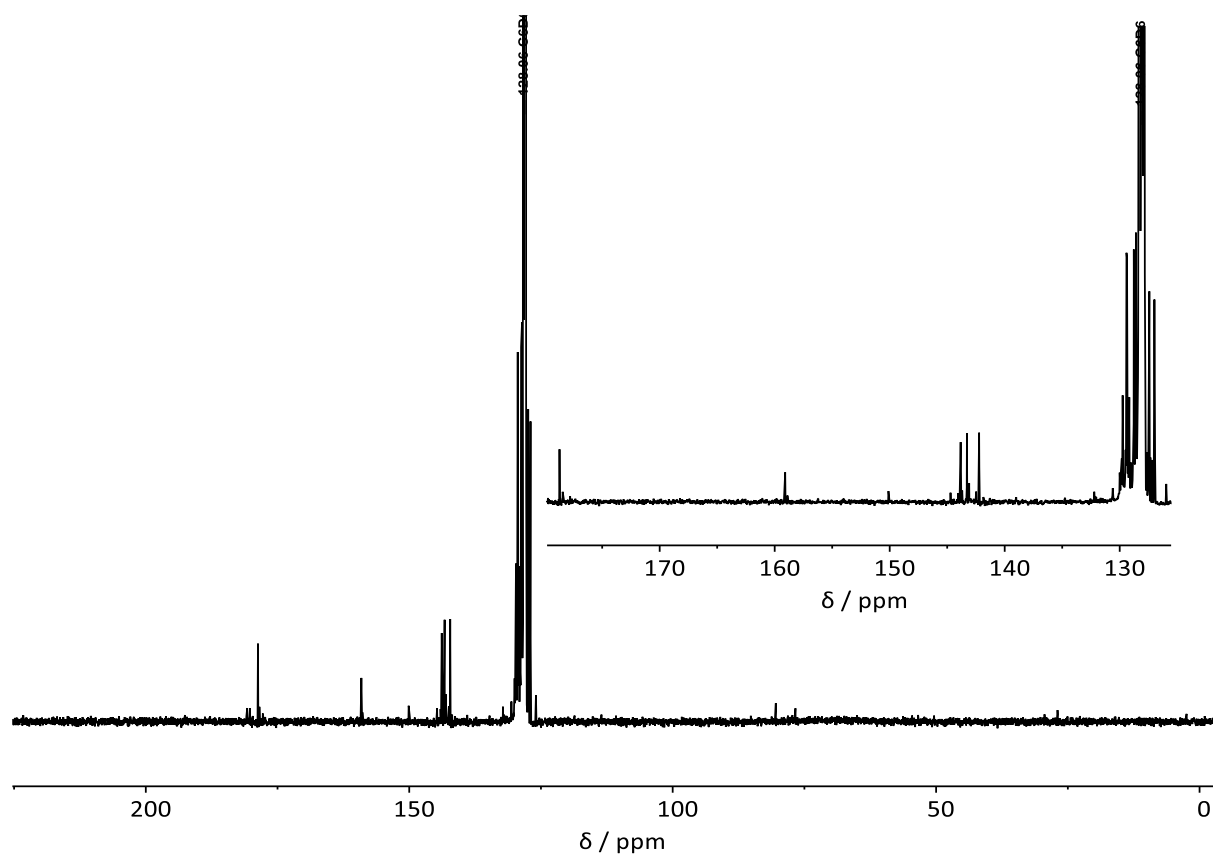

**Figure S21.**  $^{13}\text{C}$  NMR spectrum of  $[\text{Be}(\text{NCPh}_2)_2]_3$  (5) in  $\text{C}_6\text{D}_6$ .

## IR Spectra

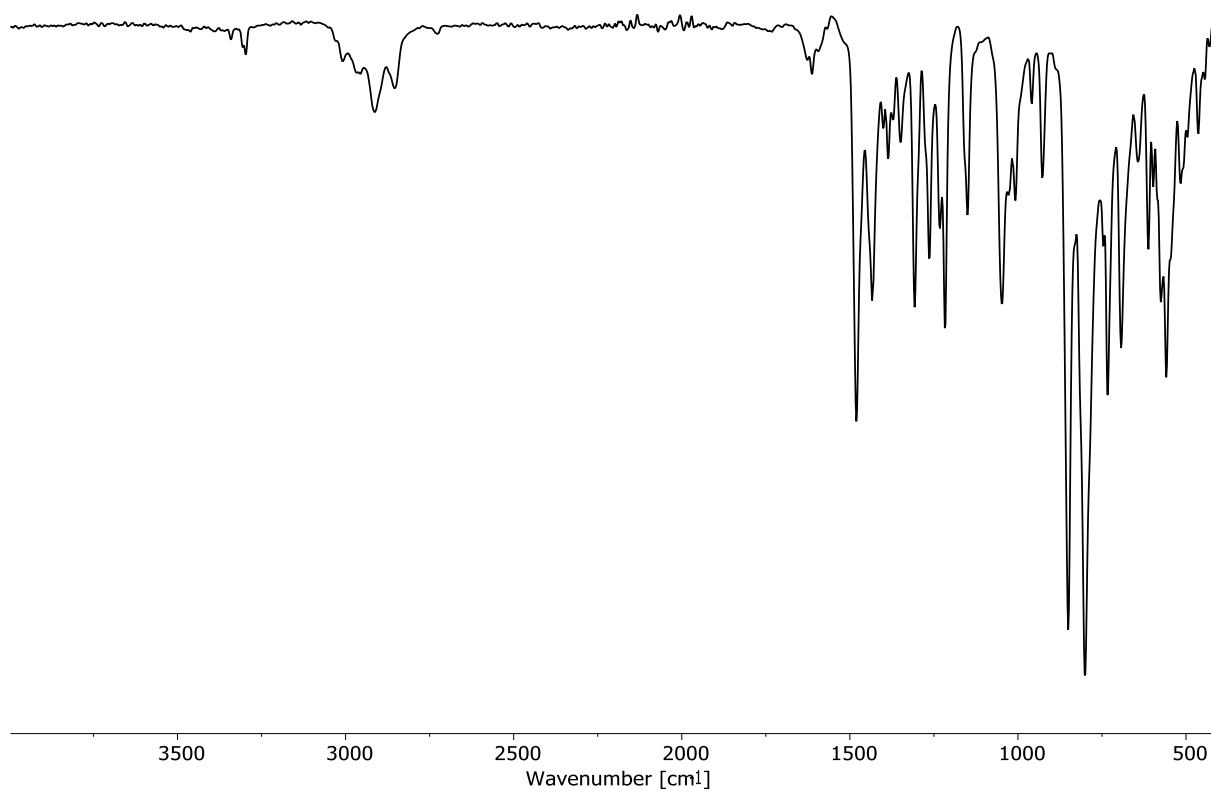

**Figure S22.** IR spectrum of  $[\text{Be}(\text{HNMes})_2]_3$  (**1**).

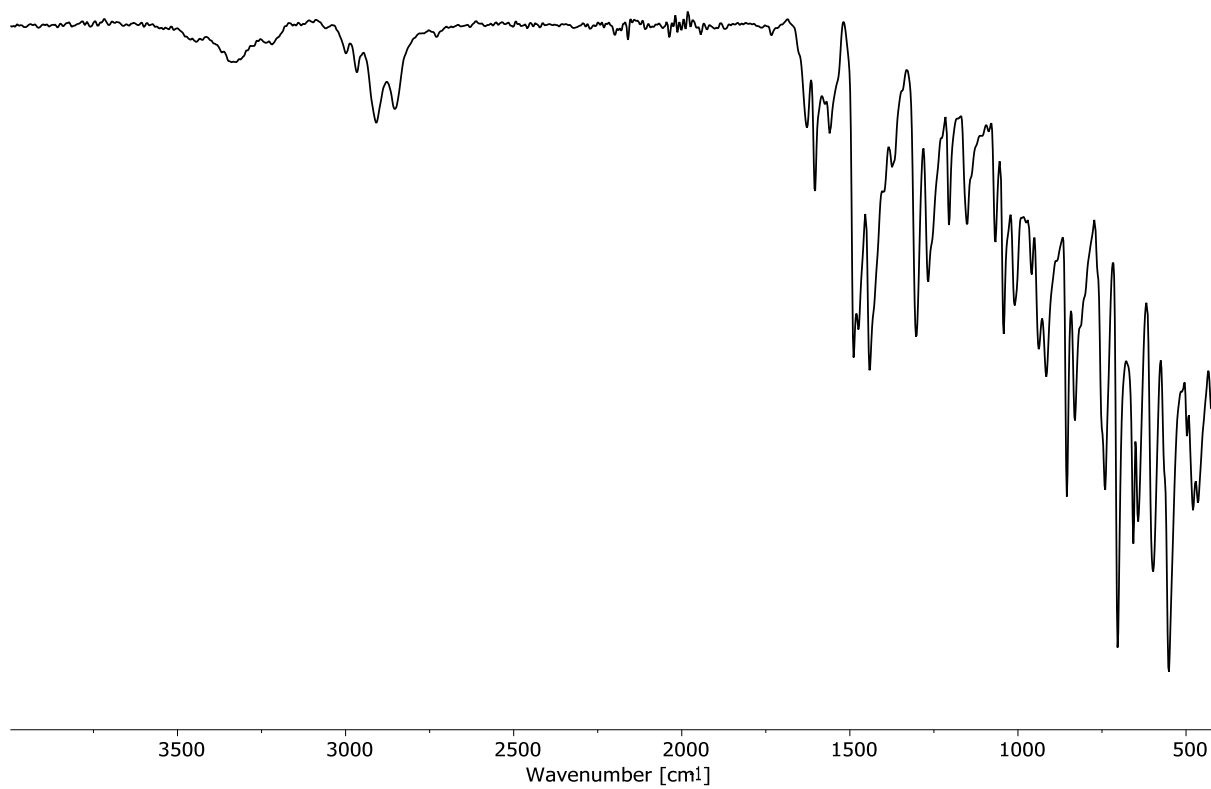

**Figure S23.** IR spectrum of  $[(\text{py})_2\text{Be}(\text{HNMes})_2]$  (**2**).

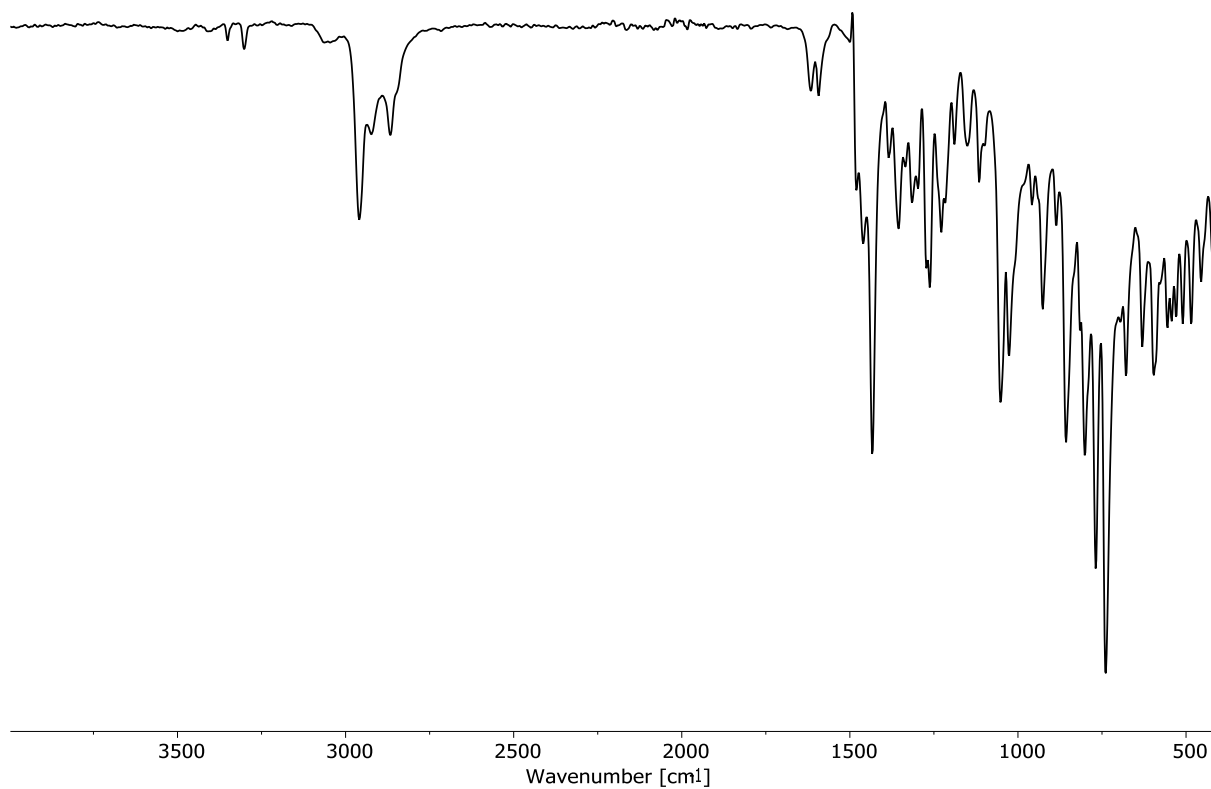

**Figure S24.** IR spectrum of  $[\text{Be}(\text{HNDipp})_2]_2$  (**3**).

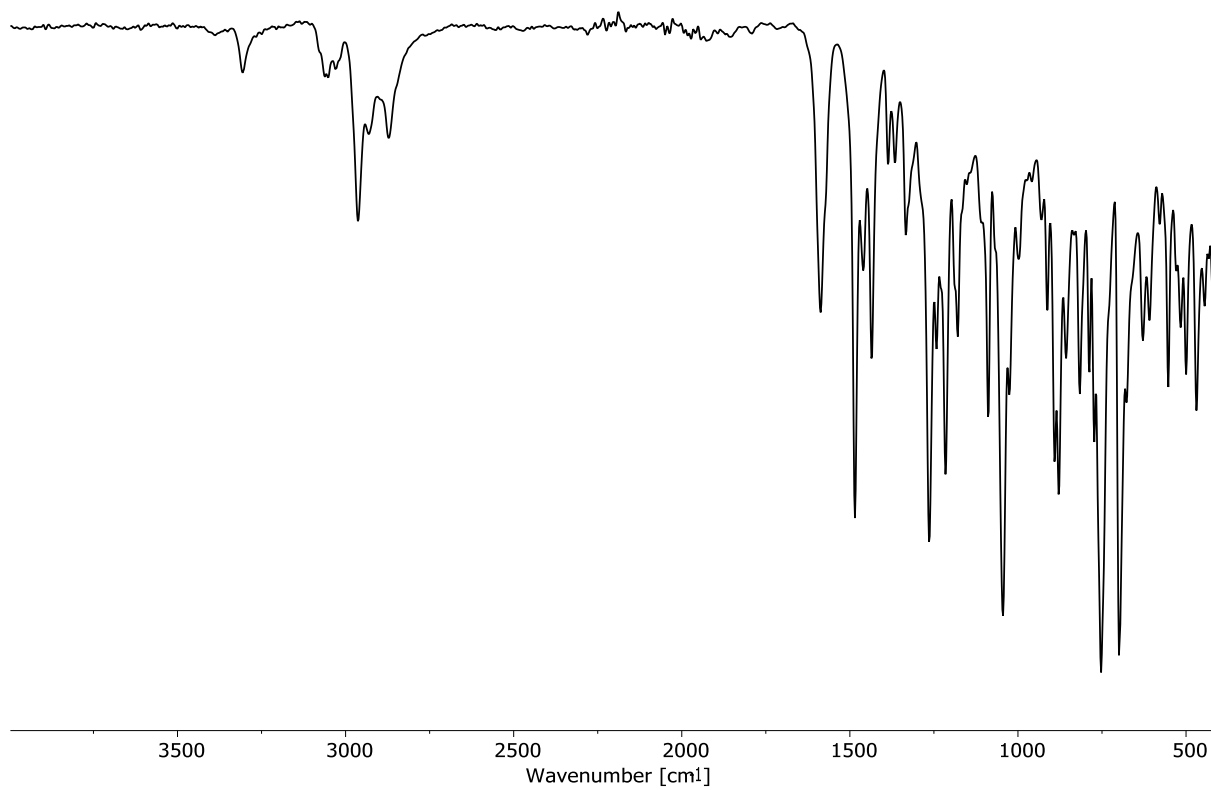

**Figure S25.** IR spectrum of  $[\text{Be}(\text{NPh}_2)(\mu_2\text{-HNDipp})]_2$  (**4**).



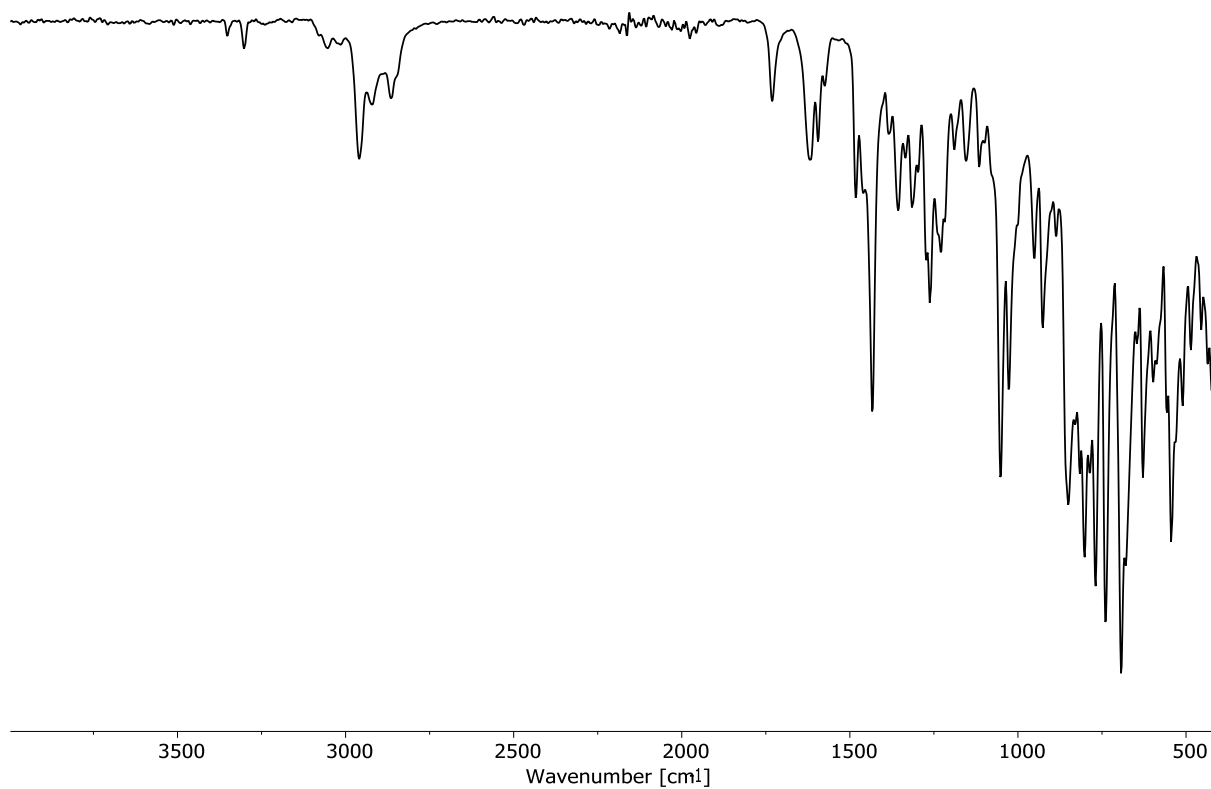

**Figure S26.** IR spectrum of  $[\text{Be}(\text{NCPh}_2)_2]_3$  (5).

## Computational results

### IAO atomic charges

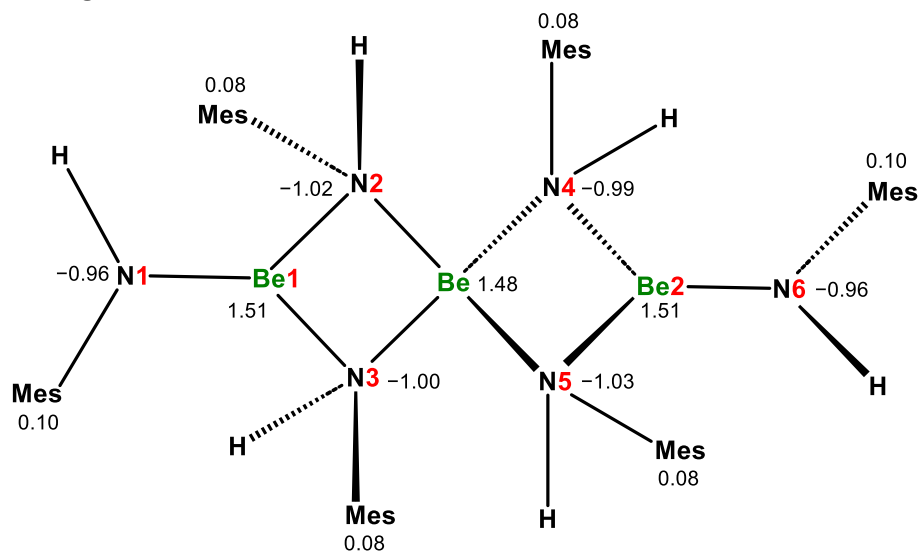

**Figure S27.** Lewis structure with IAO atomic charge analysis partial charges of selected atoms of complex **1**. The partial charges that are adjacent to the Mes label correspond to the C–N carbon atom.

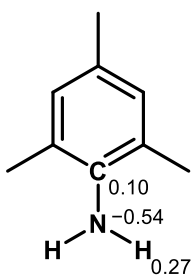

**Figure S28.** Lewis structure with IAO atomic charge analysis partial charges of selected atoms of free H<sub>2</sub>NMe. Due to symmetry, the partial charge of the unlabeled amine proton is the same as that of the labeled proton.

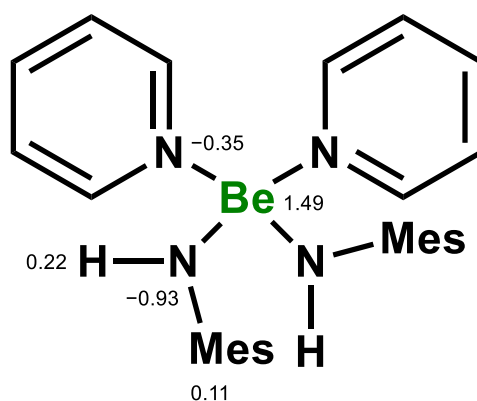

**Figure S29.** Lewis structure with IAO atomic charge analysis partial charges of selected atoms of complex **2**. The partial charges that are adjacent to the Mes label correspond to the C-N carbon atom. Due to symmetry partial charge of the same ligands are equal.

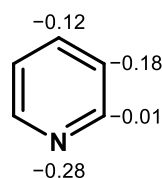

**Figure S30.** Lewis structure with IAO atomic charge analysis partial charges of selected atoms of free pyridine. Due to symmetry, the partial charges of unlabeled carbon atoms are not given and are equal to the with a mirror symmetry operation connected carbon atoms.

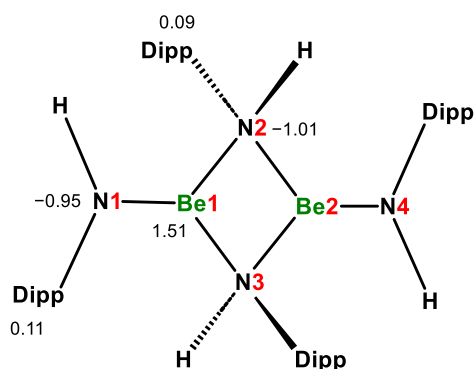

**Figure S31.** Lewis structure with IAO atomic charge analysis partial charges of selected atoms of complex **3**. The partial charges that are adjacent to the Dipp label correspond to the C-N carbon atom. Due to symmetry partial charge of Be1/Be2, N1/N2 and N2/N3 are equal.

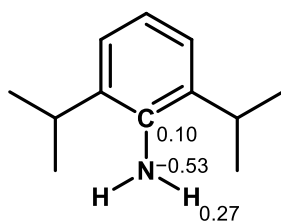

**Figure S32.** Lewis structure with IAO atomic charge analysis partial charges of selected atoms of free  $\text{H}_2\text{NDipp}$ . Due to symmetry, the partial charge of the unlabeled amine proton is the same as that of the labeled proton.

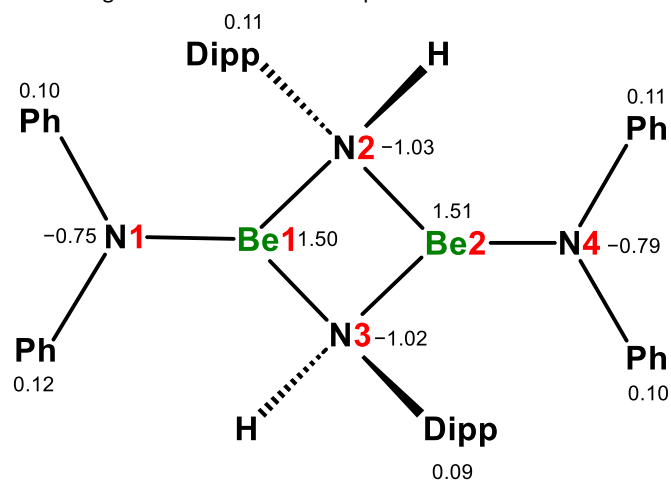

**Figure S33.** Lewis structure with IAO atomic charge analysis partial charges of selected atoms of complex **4**. The partial charges that are adjacent to the Dipp label correspond to the C-N carbon atom.

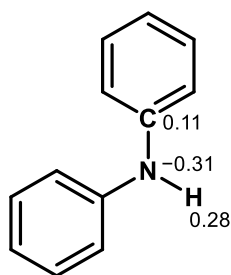

**Figure S34.** Lewis structure with IAO atomic charge analysis partial charges of selected atoms of free  $\text{HNPh}_2$ . Due to symmetry, the partial charges of unlabeled carbon atoms are not given and are equal to the with a mirror symmetry operation connected carbon atoms.

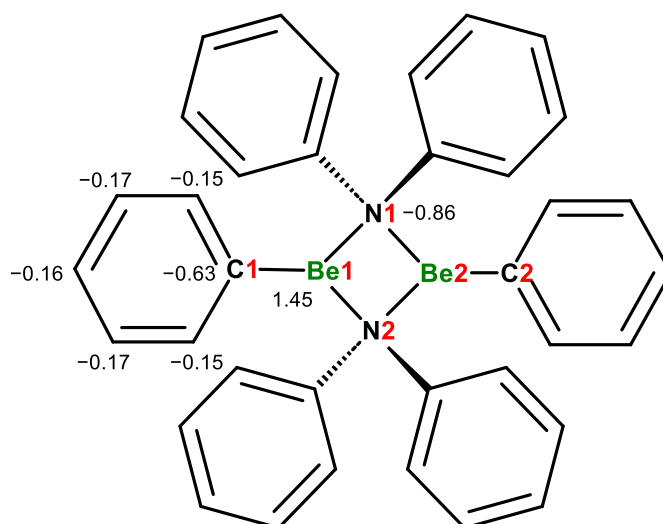

**Figure S35.** Lewis structure with IAO atomic charge analysis partial charges of selected atoms of  $[(\text{NPh}_2)\text{BePh}]_2$ . Due to symmetry partial charge of Be1/Be2, N1/N2 and C1/C2 are equal.

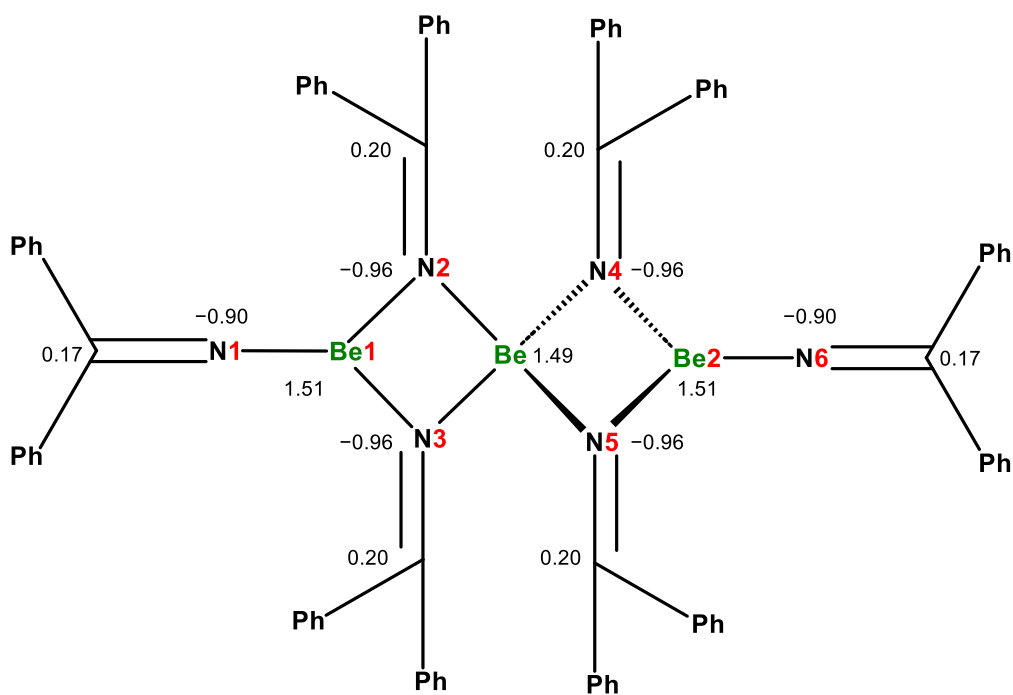

**Figure S36.** Lewis structure with IAO atomic charge analysis partial charges of selected atoms of complex 5.

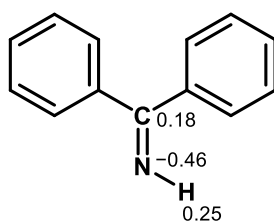

**Figure S37.** Lewis structure with IAO atomic charge analysis partial charges of selected atoms of free  $\text{HNCPh}_2$ .

## LMO analysis

**Table S3:** Comparison of the orbital contribution in the LMO bonding analysis of complex **1**, **Fig. 4 a, b**. Orbital contribution below 2% are not listed. Labelling scheme according to figure 3.

| Bond              | Atom + total contribution to LMO | s/p orbital contribution |
|-------------------|----------------------------------|--------------------------|
| 2 x $\sigma$ Be–N | N1/6 62%                         | N 27% 2s, 35% 2p         |
|                   | Be1/3 38%                        | Be 15% 2s, 21% 2p        |
| 2 x $\pi$ Be–N    | N1/6 89%                         | N 89% 2p                 |
|                   | Be1/3 11%                        | Be 8% 2p                 |

**Table S4:** Comparison of the orbital contribution in the LMO bonding analysis of complex **1**, **Fig. 6 c**. Orbital contribution below 2% are not listed. Labelling scheme according to figure 3.

| Bond                  | Atom + total contribution to LMO | s/p orbital contribution |
|-----------------------|----------------------------------|--------------------------|
| 2e3c $\sigma$ Be–N–Be | N3 55%                           | N 16% 2s, 39% 2p         |
|                       | Be2 25%                          | Be 4% 2s, 18% 2p         |
|                       | Be1 20%                          | Be1 5% 2s, 12% 2p        |
| 2e3c $\sigma$ Be–N–Be | N2 57%                           | N 19% 2s, 38% 2p         |
|                       | Be2 29%                          | Be 8% 2s, 18% 2p         |
|                       | Be1 14%                          | Be1 10% 2p               |
| 2e3c $\sigma$ Be–N–Be | N5 56%                           | N 18% 2s, 38% 2p         |
|                       | Be2 30%                          | Be 7% 2s, 20% 2p         |
|                       | Be3 14%                          | Be2 10% 2p               |
| 2e3c $\sigma$ Be–N–Be | N4 56%                           | N 17% 2s, 39% 2p         |
|                       | Be2 23%                          | Be 5% 2s, 15% 2p         |
|                       | Be3 21%                          | Be2 6% 2s, 12% 2p        |

**Table S5:** Comparison of the orbital contribution in the LMO bonding analysis of complex **1**, **Fig. 6 d**. Orbital contribution below 2% are not listed. Labelling scheme according to figure 3.

| Bond               | Atom + total contribution to LMO | s/p orbital contribution |
|--------------------|----------------------------------|--------------------------|
| 2e3c $\pi$ Be–N–Be | N4 83%                           | N 82% 2p                 |
|                    | Be2 8%                           | Be 8% 2p                 |
|                    | Be3 9%                           | Be2 6% 2p                |
| 2e3c $\pi$ Be–N–Be | N3 82%                           | N 81% 2p                 |
|                    | Be2 9%                           | Be 8% 2p                 |
|                    | Be1 9%                           | Be1 6% 2p                |
| 2 x Be–N           | N2/5 87%                         | N 86% 2p                 |
|                    | Be1/3 13%                        | Be 5% 2s, 8% 2p          |

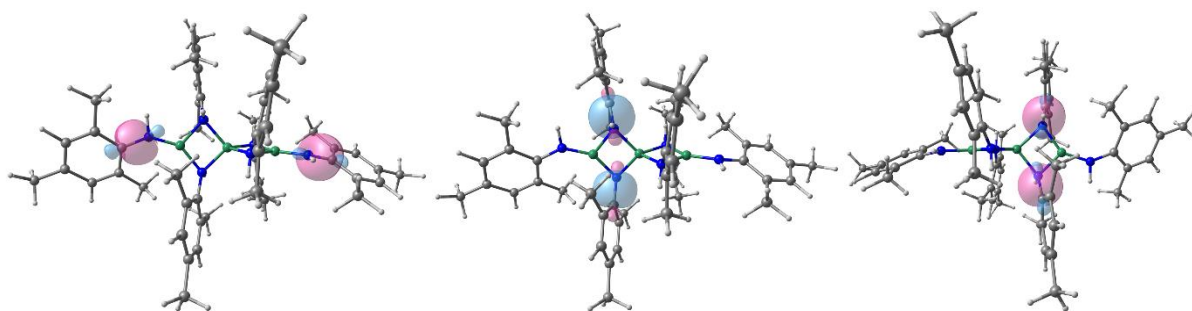

**Figure S38.** Three sets of LMOs of **1**. Two  $\sigma$ -type LMOs (left) for terminal C–N bond and four  $\sigma$ -type LMOs (middle, right) for central C–N bond. The contour value for LMO isosurface plots is 0.05 a.u. Be: green, N: blue, C: grey, H: white. Red positive phase, blue negative phase.

**Table S6:** Comparison of the orbital contribution in the LMO bonding analysis of complex **1** in the C–N bond. Orbital contribution below 2% are not listed. Labelling scheme according to figure 3.

| Bond                      | Atom + total contribution to LMO | s/p orbital contribution |
|---------------------------|----------------------------------|--------------------------|
| 2 x $\sigma$ N–C terminal | N1/6 50%                         | N 22% 2s, 28% 2p         |
|                           | C 50%                            | C 17% 2s, 32% 2p         |
| $\sigma$ N–C              | N3 56%                           | N 22% 2s, 34% 2p         |
|                           | C 44%                            | C 15% 2s, 29% 2p         |
| $\sigma$ N–C              | N2 57%                           | N 22% 2s, 34% 2p         |
|                           | C 53%                            | C 14% 2s, 29% 2p         |
| $\sigma$ N–C              | N5 56%                           | N 22% 2s, 34% 2p         |
|                           | C 44%                            | C 14% 2s, 28% 2p         |
| $\sigma$ N–C              | N4 55%                           | N 21% 2s, 34% 2p         |
|                           | C 45%                            | C 14% 2s, 29% 2p         |

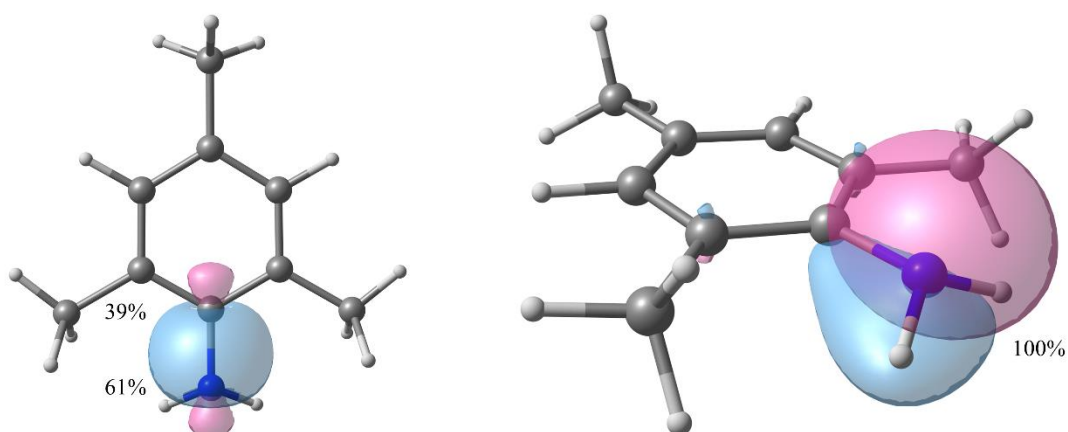

**Figure S39.** Two LMOs of  $\text{H}_2\text{NMes}$ . One  $\sigma$ -type LMOs (left) and one  $\pi$ -lone pair LMOs (right) for C–N bond of free  $\text{H}_2\text{NMes}$ . The contour value for LMO isosurface plots is 0.05 a.u. N: blue, C: grey, H: white. Red positive phase, blue negative phase.

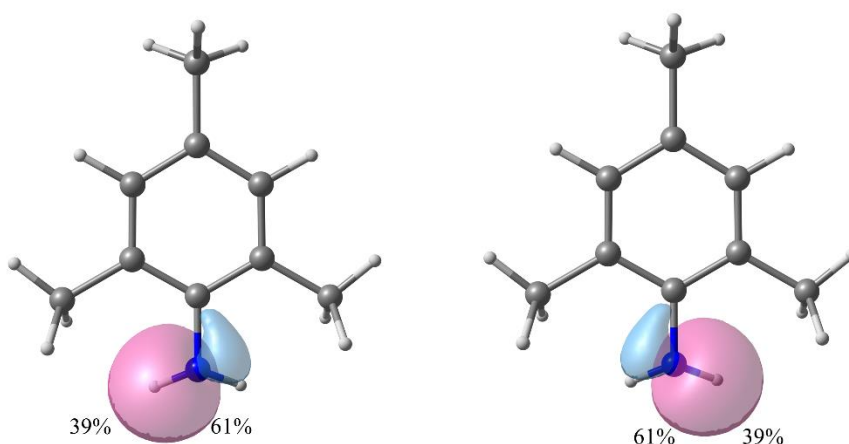

**Figure S40.** Two LMOs of  $\text{H}_2\text{NMes}$ . Two  $\sigma$ -type LMOs for C–H bond of free  $\text{H}_2\text{NMes}$ . The contour value for LMO isosurface plots is 0.05 a.u. N: blue, C: grey, H: white. Red positive phase, blue negative phase.

**Table S7:** Comparison of the orbital contribution in the LMO bonding analysis of free  $\text{H}_2\text{NMes}$ . Orbital contribution below 2% are not listed.

| Bond               | Atom + total contribution to LMO | s/p orbital contribution |
|--------------------|----------------------------------|--------------------------|
| $\sigma$ N–C       | N 39%                            | N 22% 2s, 38% 2p         |
|                    | C 61%                            | C 6% 2s, 32% 2p          |
| $\pi$ -lone pair N | N 100%                           | N 13% 2s, 87% 2p         |
| 2 x $\sigma$ N–H   | N 61%                            | N 20% 2s, 41% 2p         |
|                    | H 39%                            | H 38% 2s                 |



**Table S8:** Comparison of the orbital contribution in the LMO bonding analysis of complex **2**, Fig. 6 a, b. Orbital contribution below 2% are not listed. Labelling scheme according to figure 5.

| Bond              | Atom + total contribution to LMO | s/p orbital contribution |
|-------------------|----------------------------------|--------------------------|
| 2 x $\sigma$ Be-N | N1 74%                           | N 31% 2s, 42% 2p         |
|                   | Be 26%                           | Be 8% 2s, 16% 2p         |
| 2 x $\pi$ Be-N    | N1 88%                           | N 88% 2p                 |
|                   | Be 12%                           | Be 11% 2p                |

**Table S9:** Comparison of the orbital contribution in the LMO bonding analysis of complex **2**, Fig. 6 c. Orbital contribution below 2% are not listed. Labelling scheme according to figure 5.

| Bond              | Atom + total contribution to LMO | s/p orbital contribution |
|-------------------|----------------------------------|--------------------------|
| 2 x $\sigma$ Be-N | N2 81%                           | N 31% 2s, 50% 2p         |
|                   | Be 19%                           | Be 15% 2p                |

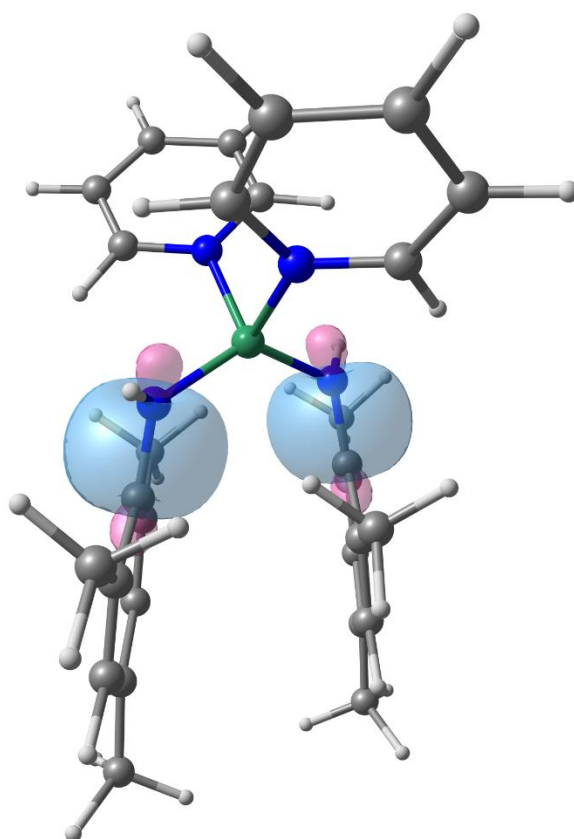

**Figure S41.** Two sets of LMOs of **2**. Two  $\sigma$ -type LMOs for mesityl ligand C-N bond. The contour value for LMO isosurface plots is 0.05 a.u. N: blue, C: grey, H: white. Red positive phase, blue negative phase.

**Table S10:** Comparison of the orbital contribution in the LMO bonding analysis of **2** C-N bond. Orbital contribution below 2% are not listed.

| Bond             | Atom + total contribution to LMO | s/p orbital contribution |
|------------------|----------------------------------|--------------------------|
| 2 x $\sigma$ C-N | N 58%                            | N 11% 2s, 30% 2p         |
|                  | C 42%                            | C 24% 2s, 34% 2p         |

**Table S11:** Comparison of the orbital contribution in the LMO bonding analysis of complex **3**, **Fig. 8 a, b**. Orbital contribution below 2% are not listed. Labelling scheme according to figure 7.

| Bond              | Atom + total contribution to LMO | s/p orbital contribution |
|-------------------|----------------------------------|--------------------------|
| 2 x $\sigma$ Be–N | N1 54%                           | N 25% 2s, 29% 2p         |
|                   | Be 46%                           | Be 21% 2s, 23% 2p        |
| 2e3c $\pi$ Be–N–C | N1 87%                           | N 87% 2p                 |
|                   | Be 7%                            | Be 5% 2p                 |
|                   | C 7%                             | C 4% 2p                  |
| 2e3c $\pi$ Be–N–C | N1 87%                           | N 87% 2p                 |
|                   | Be1 7%                           | Be 5% 2p                 |
|                   | C 5%                             | C 3% 2p                  |

**Table S12:** Comparison of the orbital contribution in the LMO bonding analysis of complex **3**, **Fig. 8 c, d**. Orbital contribution below 2% are not listed. Labelling scheme according to figure 7.

| Bond               | Atom + total contribution to LMO | s/p orbital contribution |
|--------------------|----------------------------------|--------------------------|
| 2e3c $\sigma$ Be–N | N2' 53%                          | N 16% 2s, 37% 2p         |
|                    | Be 17%                           | Be 4% 2s, 10% 2p         |
|                    | Be' 30%                          | Be 10% 2s, 17% 2p        |
| 2e3c $\sigma$ Be–N | N2 53%                           | N 16% 2s, 37% 2p         |
|                    | Be 30%                           | Be 10% 2s, 17% 2p        |
|                    | Be' 17%                          | Be 4% 2s, 10% 2p         |
| 2 x $\pi$ Be–N     | N2 85%                           | N 85% 2p                 |
|                    | Be 15%                           | Be 4% 2s, 9% 2p          |

**Table S13:** Comparison of the orbital contribution in the LMO bonding analysis of complex **3**, **Fig. 8 e**. Orbital contribution below 2% are not listed. Labelling scheme according to figure 7.

| Bond                         | Atom + total contribution to LMO | s/p orbital contribution |
|------------------------------|----------------------------------|--------------------------|
| 2 x $\sigma$ C–H $\cdots$ Be | C 49%                            | C 12% 2s, 36% 2p         |
|                              | H 45%                            | H 44% 2s                 |
|                              | Be 6%                            | Be 5% 2p                 |

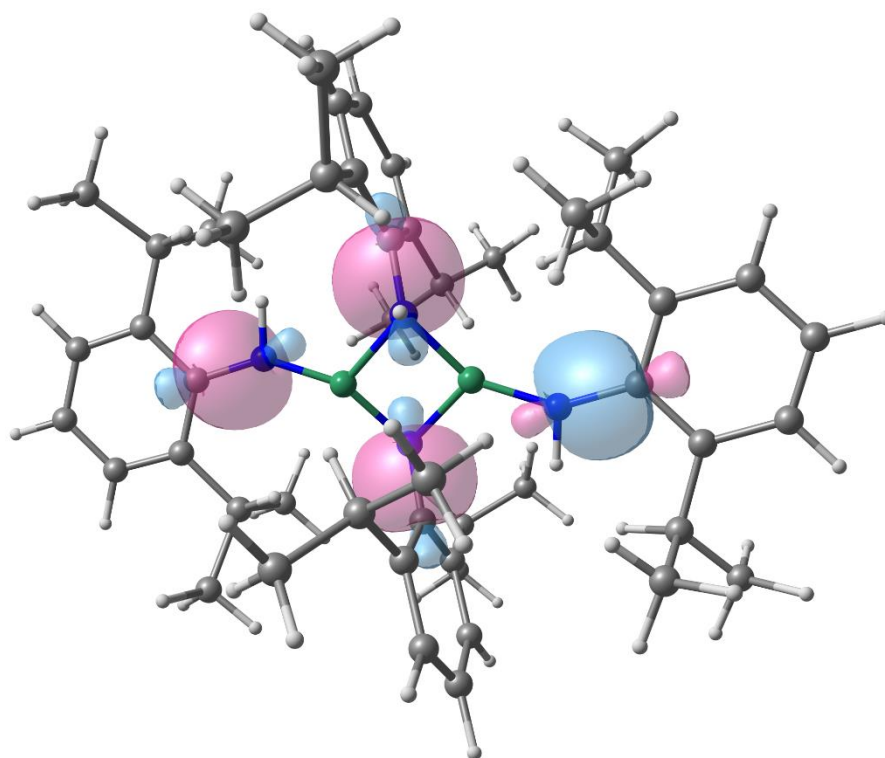

**Figure S42.** Four sets of LMOs of **3**. Four  $\sigma$ -type LMOs for C–N bond. The contour value for LMO isosurface plots is 0.05 a.u.  
Be: green, N: blue, C: grey, H: white. Red positive phase, blue negative phase

**Table S14:** Comparison of the orbital contribution in the LMO bonding analysis of complex **3**. Orbital contribution below 2% are not listed.

| Bond                     | Atom + total contribution to LMO | s/p orbital contribution |
|--------------------------|----------------------------------|--------------------------|
| $2 \times \sigma$ C–N1/4 | N 50%                            | N 23% 2s, 27% 2p         |
|                          | C 50%                            | C 14% 2s, 35% 2p         |
| $2 \times \sigma$ C–N2/3 | N 54%                            | N 21% 2s, 33% 2p         |
|                          | C 46%                            | C 15% 2s, 29% 2p         |

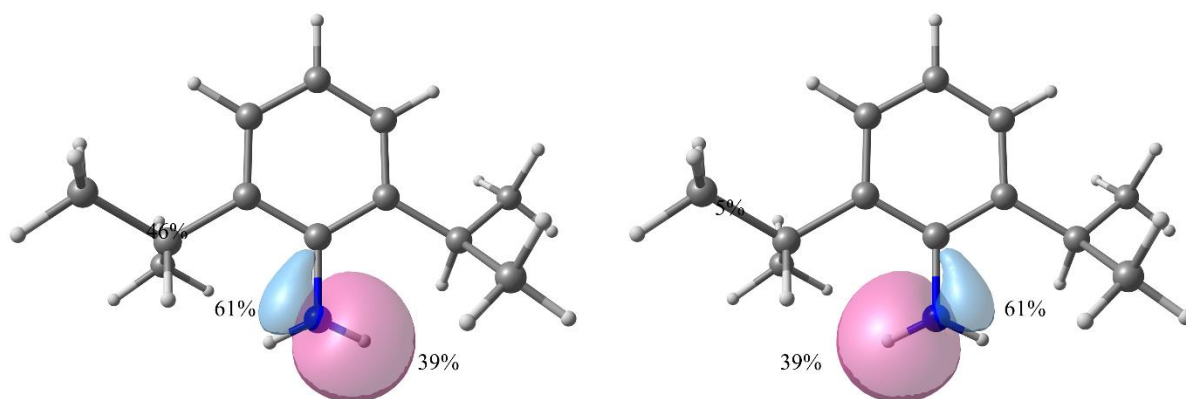

**Figure S43.** Two LMOs of H<sub>2</sub>NDipp. Two  $\sigma$ -type LMOs for C–H bond of free H<sub>2</sub>NDipp. The contour value for LMO isosurface plots is 0.05 a.u. N: blue, C: grey, H: white. Red positive phase, blue negative phase.

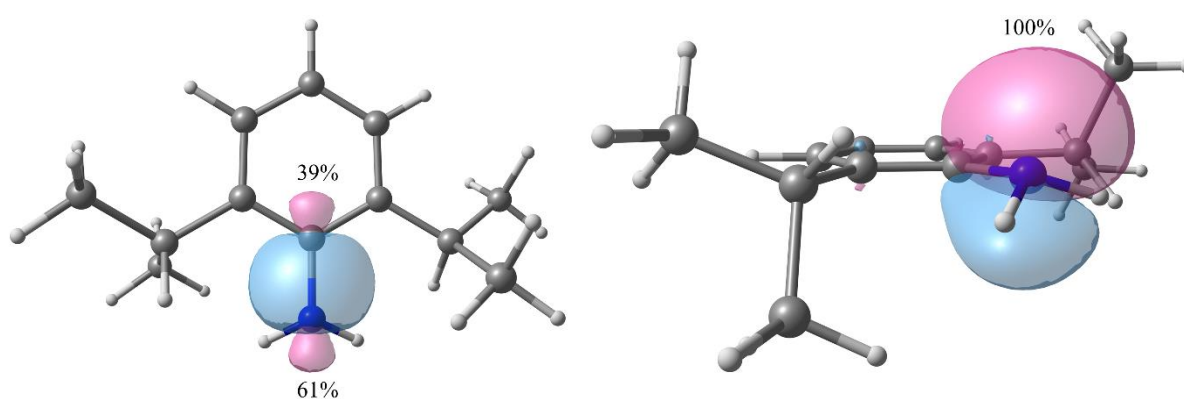

**Figure S44.** Two LMOs of H<sub>2</sub>NDipp. One  $\sigma$ -type (left) and  $\pi$ -lone pair LMOs for C–N bond of free H<sub>2</sub>NDipp. The contour value for LMO isosurface plots is 0.05 a.u. N: blue, C: grey, H: white. Red positive phase, blue negative phase.

**Table S15:** Comparison of the orbital contribution in the LMO bonding analysis of free H<sub>2</sub>NDipp. Orbital contribution below 2% are not listed.

| Bond               | Atom + total contribution to LMO | s/p orbital contribution |
|--------------------|----------------------------------|--------------------------|
| $\sigma$ N–C       | N 61%                            | N 22% 2s, 38% 2p         |
|                    | C 39%                            | C 6% 2s, 33% 2p          |
| $\pi$ -lone pair N | N 100%                           | N 14% 2s, 86% 2p         |
| 2 x $\sigma$ N–H   | N 61%                            | N 20% 2s, 41% 2p         |
|                    | H 39%                            | H 38% 2s                 |

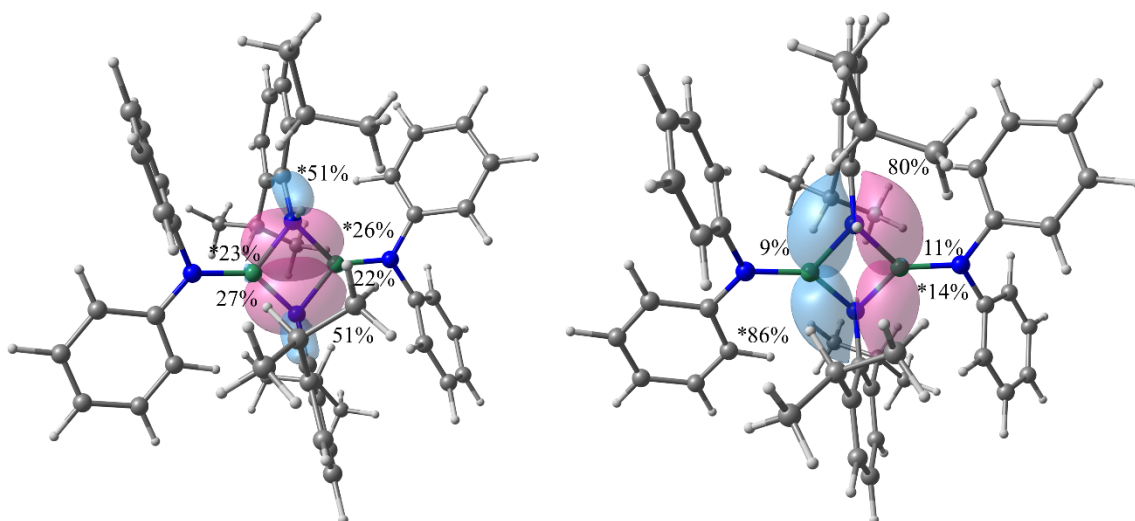

**Figure S45.** Two sets of LMOs of **4**. Two  $2e3c$ -type LMOs (left) and two  $\pi$ -type LMOs (right) for Be–N(Dipp) bond. The contour value for LMO isosurface plots is 0.05 a.u. Be: green, N: blue, C: grey, H: white. Red positive phase, blue negative phase.

**Table S16:** Comparison of the orbital contribution in the LMO bonding analysis of complex **2**. Orbital contribution below 2% are not listed.

| Bond                           | Atom + total contribution to LMO | s/p orbital contribution  |
|--------------------------------|----------------------------------|---------------------------|
| $2 \times 2e3c \sigma$ Be–N–Be | N3/2 51/51%                      | N3/2 15/15% 2s, 36/37% 2p |
|                                | Be1 27/23%                       | Be1 10/4% 2s 13/14% 2p    |
|                                | Be2 22/26%                       | Be2 6/8% 2s 12/14% 2p     |
| $2e3c \pi$ Be–N–Be             | N2 80%                           | N 80% 2p                  |
|                                | Be1 9%                           | Be1 7% 2p                 |
|                                | Be2 11%                          | Be2 8% 2p                 |
| $\pi$ Be–N                     | N3 86%                           | N 86% 2p                  |
|                                | Be2 14%                          | Be2 5% 2s, 8% 2p          |

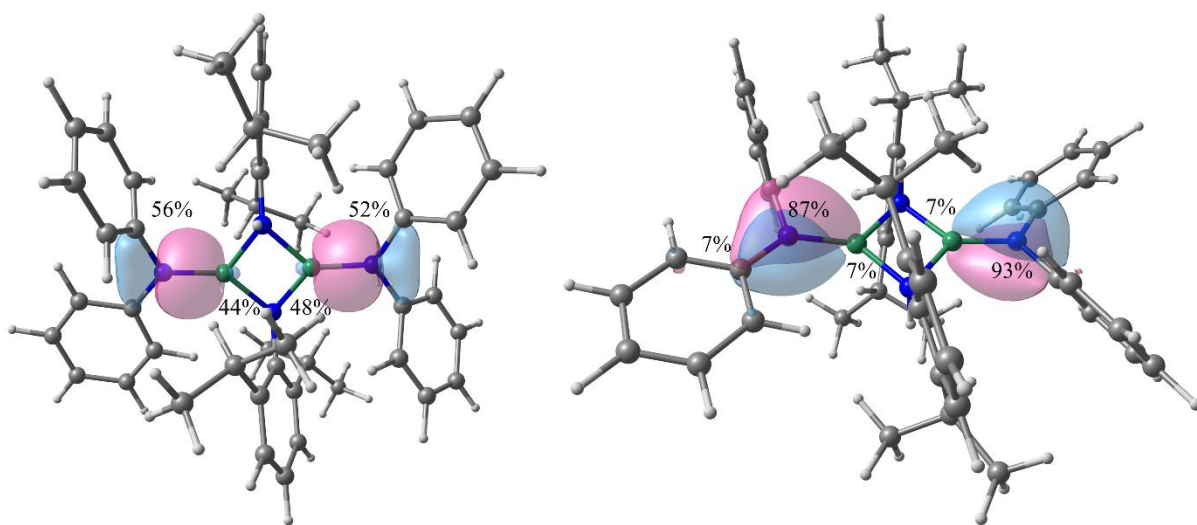

**Figure S46.** Two sets of LMOs of **4**. Two  $\sigma$ -type LMOs (left) and two  $\pi$ -type LMOs (right) for Be–N(NPh<sub>2</sub>) bond. The contour value for LMO isosurface plots is 0.05 a.u. Be: green, N: blue, C: grey, H: white. Red positive phase, blue negative phase.

**Table S17:** Comparison of the orbital contribution in the LMO bonding analysis of complex **4**. Orbital contribution below 2% are not listed.

| Bond              | Atom + total contribution to LMO | s/p orbital contribution |
|-------------------|----------------------------------|--------------------------|
| $\sigma$ Be–N     | N1 56%                           | N 25% 2s, 31% 2p         |
|                   | Be1 44%                          | Be1 19% 2s 23% 2p        |
| $\sigma$ Be–N     | N4 52%                           | N 24% 2s, 38% 2p         |
|                   | Be2 48%                          | Be2 22% 2s 23% 2p        |
| 2e3c $\pi$ Be–N–C | N1 87%                           | N 87% 2p                 |
|                   | Be1 7%                           | Be1 4% 2p                |
|                   | C 7%                             | C 4% 2p                  |
| $\pi$ Be–N        | N4 93%                           | N 93% 2p                 |
|                   | Be2 7%                           | Be2 4% 2p                |

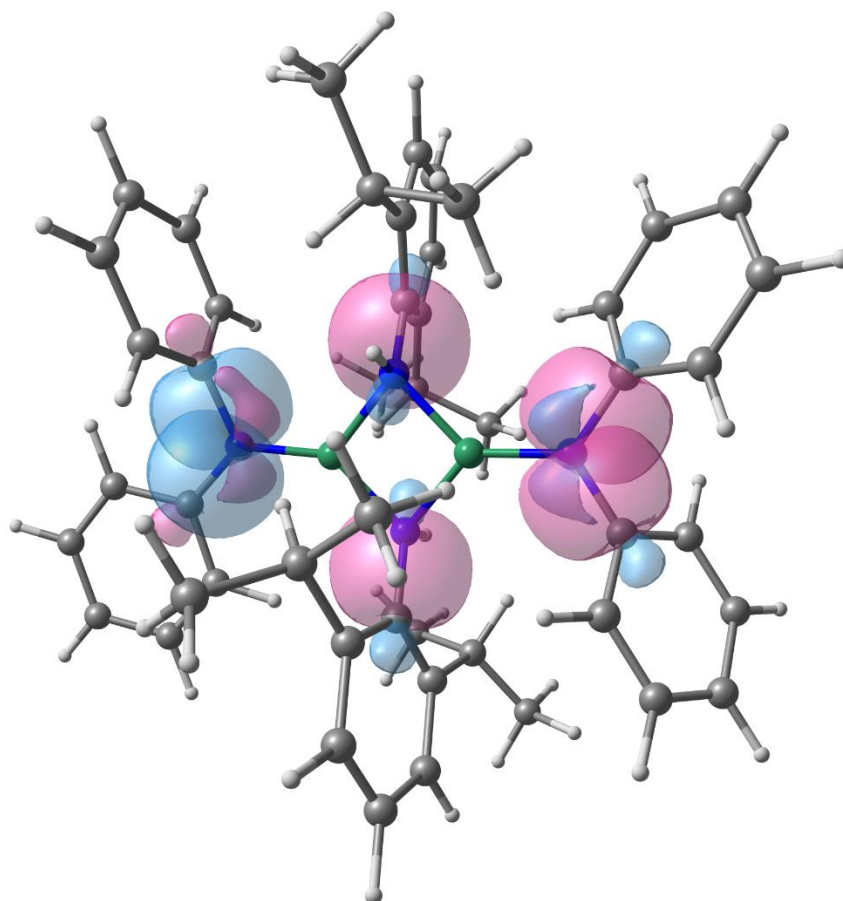

**Figure S47.** Six sets of LMOs of 1. Four  $\sigma$ -type LMOs for C–N bond. The contour value for LMO isosurface plots is 0.05 a.u. Be: green, N: blue, C: grey, H: white. Red positive phase, blue negative phase

**Table S18:** Comparison of the orbital contribution in the LMO bonding analysis of complex 4. Orbital contribution below 2% are not listed.

| Bond          | Atom + total contribution to LMO | s/p orbital contribution |
|---------------|----------------------------------|--------------------------|
| $\sigma$ C–N1 | N 49%                            | N 21% 2s, 28% 2p         |
|               | C 51%                            | C 19% 2s, 31% 2p         |
| $\sigma$ C–N1 | N 55%                            | N 23% 2s, 31% 2p         |
|               | C 45%                            | C 17% 2s, 27% 2p         |
| $\sigma$ C–N4 | N 49%                            | N 20% 2s, 28% 2p         |
|               | C 51%                            | C 20% 2s, 30% 2p         |
| $\sigma$ C–N4 | N 50%                            | N 21% 2s, 28% 2p         |
|               | C 50%                            | C 19% 2s, 30% 2p         |
| $\sigma$ C–N2 | N 57%                            | N 23% 2s, 33% 2p         |
|               | C 43%                            | C 16% 2s, 26% 2p         |
| $\sigma$ C–N3 | N 56%                            | N 23% 2s, 33% 2p         |
|               | C 44%                            | C 16% 2s, 27% 2p         |

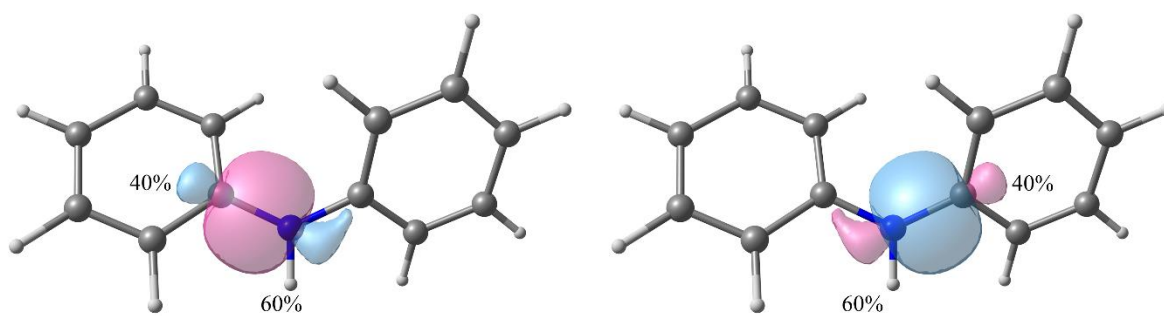

**Figure S48.** Two LMOs of HNPh<sub>2</sub>. Two  $\sigma$ -type LMOs for C–N bond of free HNPh<sub>2</sub>. The contour value for LMO isosurface plots is 0.05 a.u. N: blue, C: grey, H: white. Red positive phase, blue negative phase.

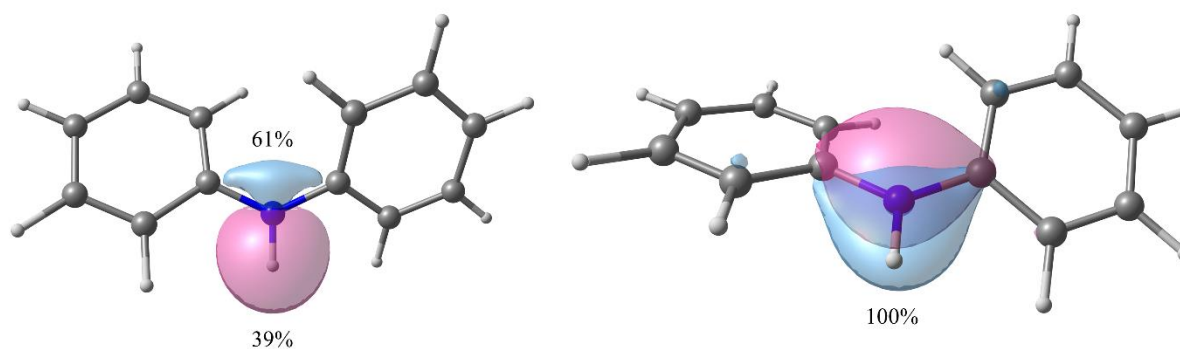

**Figure S49.** Two LMOs of HNPh<sub>2</sub>. One  $\sigma$ -type (left) and  $\pi$ -lone pair LMOs for C–H bond of free HNPh<sub>2</sub>. The contour value for LMO isosurface plots is 0.05 a.u. N: blue, C: grey, H: white. Red positive phase, blue negative phase.

**Table S19:** Comparison of the orbital contribution in the LMO bonding analysis of free HNPh<sub>2</sub>. Orbital contribution below 2% are not listed.

| Bond                  | Atom + total contribution to LMO | s/p orbital contribution |
|-----------------------|----------------------------------|--------------------------|
| $2 \times \sigma$ N–C | N 60%                            | N 25% 2s, 34% 2p         |
|                       | C 40%                            | C 13% 2s, 27% 2p         |
| $\pi$ -lone pair N    | N 100%                           | N 100% 2p                |
| $\sigma$ N–H          | N 61%                            | N 22% 2s, 38% 2p         |
|                       | H 39%                            | H 38% 2s                 |



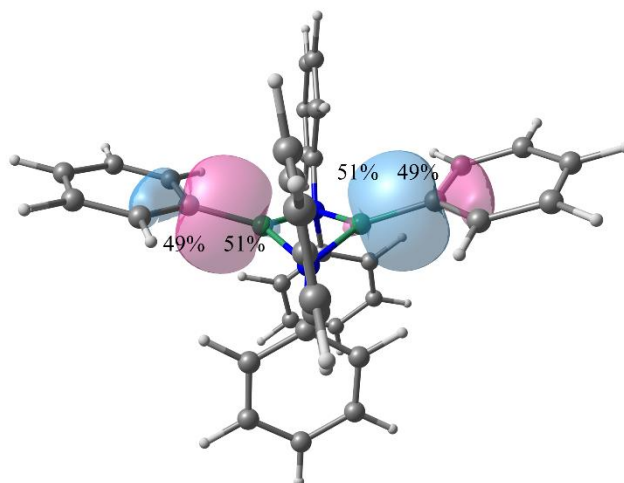

**Figure S50.** Two sets of LMOs of  $[(\text{Ph}_2\text{N})\text{BePh}]_2$ . Two  $\sigma$ -type LMOs for Be–C bond. The contour value for LMO isosurface plots is 0.05 a.u. Be: green, N: blue, C: grey, H: white. Red positive phase, blue negative phase.

**Table S20:** Comparison of the orbital contribution in the LMO bonding analysis of  $[(\text{Ph}_2\text{N})\text{BePh}]_2$ . Orbital contribution below 2% are not listed.

| Bond                   | Atom + total contribution to LMO | s/p orbital contribution |
|------------------------|----------------------------------|--------------------------|
| $2 \times \sigma$ Be–C | C 49%                            | C 26% 2s, 22% 2p         |
|                        | Be 59%                           | Be 29% 2s, 21% 2p        |

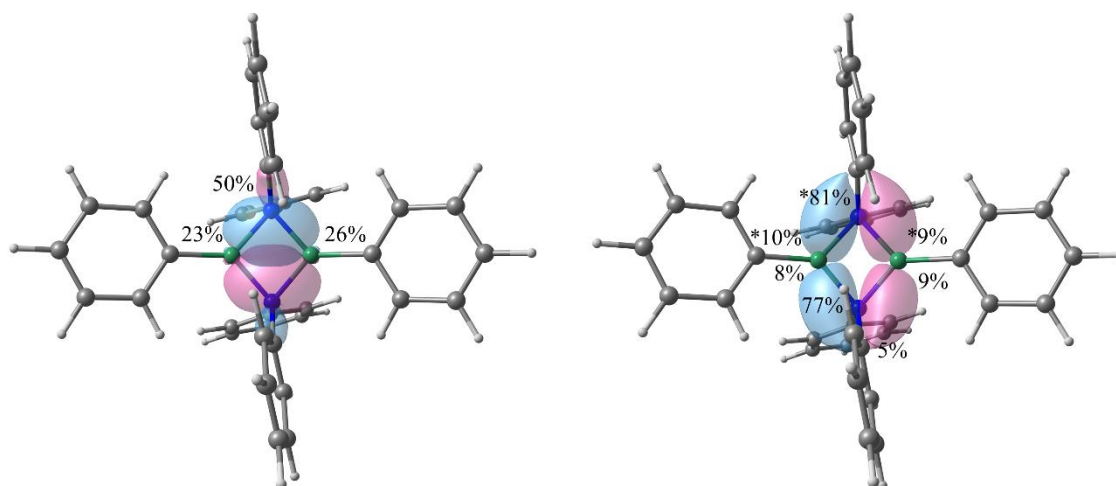

**Figure S51.** Two sets of LMOs of  $[(\text{Ph}_2\text{N})\text{BePh}]_2$ . Two  $2e3c$ -type LMOs (left) and two  $\pi$ -type LMOs (right) for Be–N bond. The contour value for LMO isosurface plots is 0.05 a.u. Be: green, N: blue, C: grey, H: white. Red positive phase, blue negative phase.

**Table S21:** Comparison of the orbital contribution in the LMO bonding analysis of  $[(\text{Ph}_2\text{N})\text{BePh}]_2$ . Orbital contribution below 2% are not listed.

| Bond                      | Atom + total contribution to LMO | s/p orbital contribution |
|---------------------------|----------------------------------|--------------------------|
| 2 x 2e3c $\sigma$ Be–N–Be | N 50%                            | N 14% 2s, 36% 2p         |
|                           | Be1 23/26%                       | Be1 5/8% 2s 14% 2p       |
|                           | Be2 26/23%                       | Be2 8/5% 2s 14% 2p       |
| 2e4c $\pi$ Be–N(C)–Be     | N 77%                            | N 77% 2p                 |
|                           | Be1 8%                           | Be1 7% 2p                |
|                           | Be2 9%                           | Be2 7% 2p                |
|                           | C 5%                             | C 3% 2p                  |
| 2e3c $\pi$ Be–N–Be        | N 81%                            | N 81% 2p                 |
|                           | Be1 10%                          | Be1 8% 2p                |
|                           | Be2 9%                           | Be2 7% 2p                |

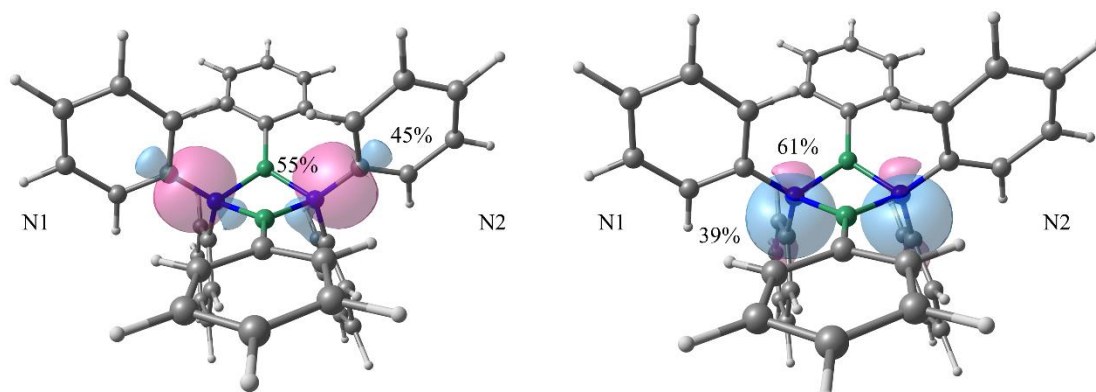

**Figure S52.** Four sets of LMOs of  $[(\text{Ph}_2\text{N})\text{BePh}]_2$ . Two  $\sigma$ -type LMOs (left) and two  $\sigma$ -type LMOs (right) for C–N bond. The contour value for LMO isosurface plots is 0.05 a.u. Be: green, N: blue, C: grey, H: white. Red positive phase, blue negative phase.

**Table S22:** Comparison of the orbital contribution in the LMO bonding analysis of  $[(\text{Ph}_2\text{N})\text{BePh}]_2$  in the C–N bond. Orbital contribution below 2% are not listed.

| Bond             | Atom + total contribution to LMO | s/p orbital contribution |
|------------------|----------------------------------|--------------------------|
| 2 x $\sigma$ N–C | N1/2 55%                         | N 20% 2s, 34% 2p         |
|                  | C 45%                            | C 18% 2s, 27% 2p         |
| 2 x $\sigma$ N–C | N1/2 61%                         | N 21% 2s, 39% 2p         |
|                  | C 39%                            | C 12% 2s, 26% 2p         |

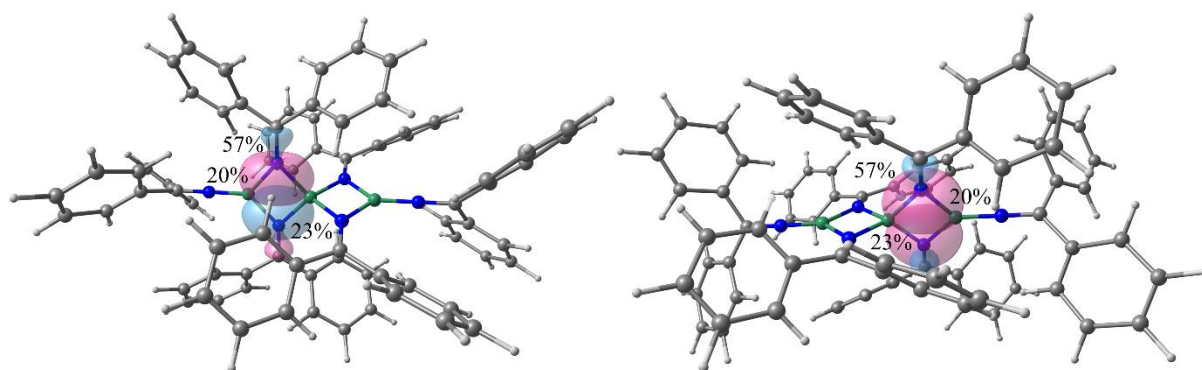

**Figure S53.** Two sets of LMOs of **5**. Four  $2e3c$ -type LMOs (left and right) for Be–N(CPh<sub>2</sub>)–Be bond. The contour value for LMO isosurface plots is 0.05 a.u. Be: green, N: blue, C: grey, H: white. Red positive phase, blue negative phase.

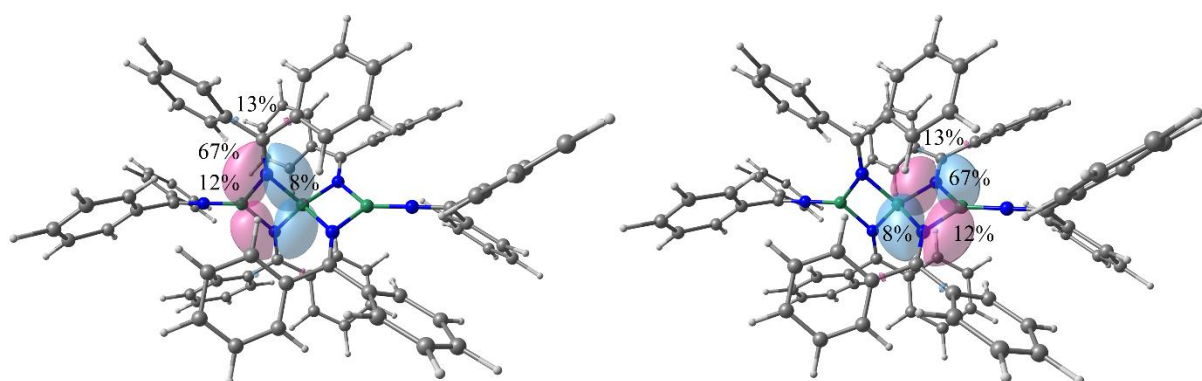

**Figure S54.** Two sets of LMOs of **5**. Four  $2e3c$ -type LMOs (left and right) for Be–N(CPh<sub>2</sub>)–Be bond. The contour value for LMO isosurface plots is 0.05 a.u. Be: green, N: blue, C: grey, H: white. Red positive phase, blue negative phase.

**Table S23:** Comparison of the orbital contribution in the LMO bonding analysis of complex **5**. Be1: Central Atom; Orbital contribution below 2% are not listed.

| Bond                        | Atom + total contribution to LMO | s/p orbital contribution |
|-----------------------------|----------------------------------|--------------------------|
| 4 x $2e3c$ $\sigma$ Be–N–Be | N 57%                            | N 43% 2s, 14% 2p         |
|                             | Be1 23%                          | Be1 17% 2p               |
|                             | Be2/3 20%                        | Be2/3 4% 2s, 13% 2p      |
| 4 x $2e3c$ $\pi$ Be–N(C)–Be | N 67%                            | N 67% 2p                 |
|                             | Be1 8%                           | Be1 3% 2s, 3% 2p         |
|                             | Be2/3 12%                        | Be2/3 7% 2s, 4% 2p       |
|                             | C 13%                            | C 8% 2p                  |

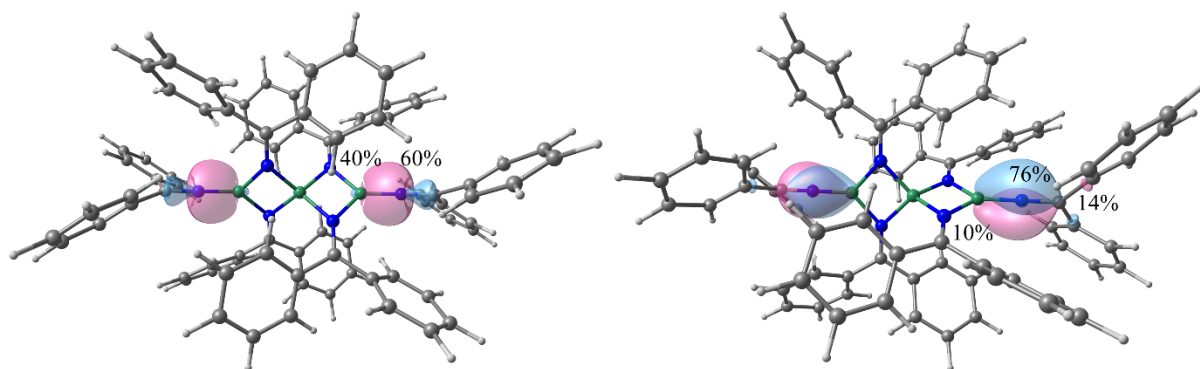

**Figure S55.** Two sets of LMOs of **5**. Two  $\sigma$ -type LMOs (left) and two  $\pi$ -type LMOs (right) for Be–N(CPh<sub>2</sub>) bond. The contour value for LMO isosurface plots is 0.05 a.u. Be: green, N: blue, C: grey, H: white. Red positive phase, blue negative phase.

**Table S24:** Comparison of the orbital contribution in the LMO bonding analysis of complex **5**. Be1: Central Atom; Orbital contribution below 2% are not listed.

| Bond               | Atom + total contribution to LMO | s/p orbital contribution |
|--------------------|----------------------------------|--------------------------|
| 2 $\sigma$ Be2/3–N | N 60%                            | N 49% 2s, 11% 2p         |
|                    | Be2/3 40%                        | Be2/3 8% 2s, 20% 2p      |
| 2 $\pi$ Be2/3–N–C  | N 76%                            | N 76% 2p                 |
|                    | Be2/3 10%                        | Be2/3 8% 2p              |
|                    | C 14%                            | C 8% 2p                  |

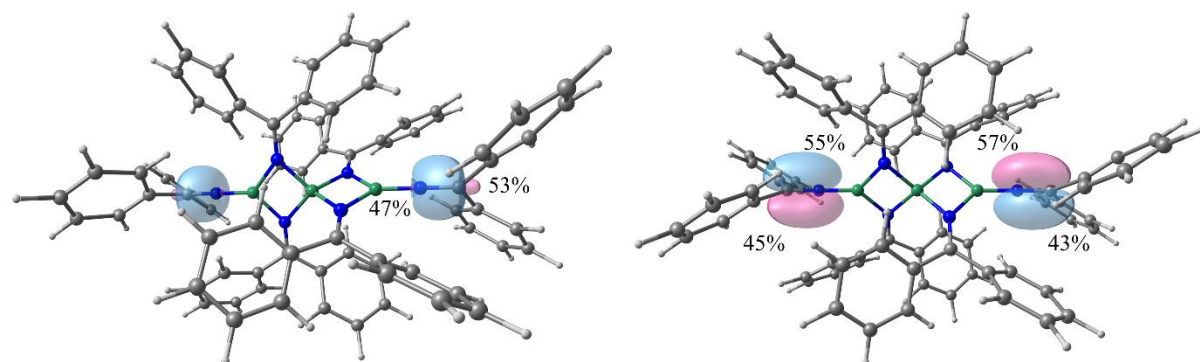

**Figure S56.** Four sets of LMOs of **5**. Two  $\sigma$ -type and two  $\pi$ -type LMOs for the terminal C–N bonds. The contour value for LMO isosurface plots is 0.05 a.u. Be: green, N: blue, C: grey, H: white. Red positive phase, blue negative phase

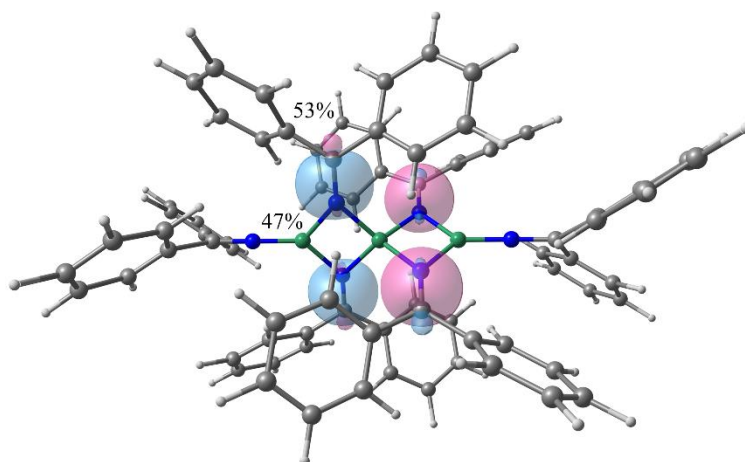

**Figure S57.** Four sets of LMOs of **5**. Four  $\sigma$ -type LMOs for bridging C–N bonds. The contour value for LMO isosurface plots is 0.05 a.u. Be: green, N: blue, C: grey, H: white. Red positive phase, blue negative phase

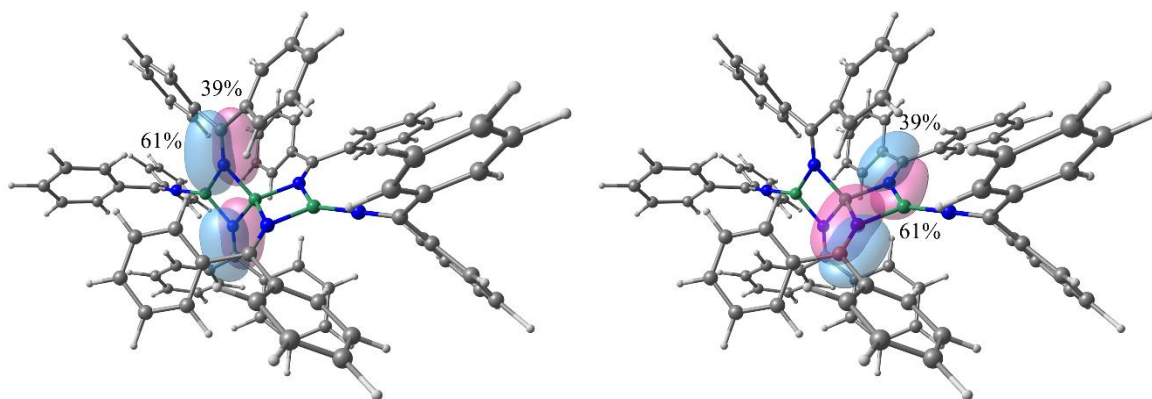

**Figure S58.** Four sets of LMOs of **5**. Four  $\pi$ -type LMOs for bridging C–N bonds. The contour value for LMO isosurface plots is 0.05 a.u. Be: green, N: blue, C: grey, H: white. Red positive phase, blue negative phase

**Table S25:** Comparison of the orbital contribution in the LMO bonding analysis of complex **5** in the C–N bond. Orbital contribution below 2% are not listed.

| Bond                      | Atom + total contribution to LMO | s/p orbital contribution |
|---------------------------|----------------------------------|--------------------------|
| 2 x $\sigma$ N–C terminal | N1/6 47%                         | N 28% 2s, 19% 2p         |
|                           | C 53%                            | C 24% 2s, 27% 2p         |
| $\pi$ N–C terminal        | N1 55%                           | N 55% 2p                 |
|                           | C 45%                            | C 43% 2p                 |
| $\pi$ N–C terminal        | N6 57%                           | N 57% 2p                 |
|                           | C 43%                            | C 41% 2p                 |
| 4 x $\sigma$ N–C          | N2/3/4/5 47%                     | N 26% 2s, 21% 2p         |
|                           | C 53%                            | C 24% 2s, 28% 2p         |
| 4 x $\pi$ N–C             | N2/3/4/5 61%                     | N 61% 2p                 |
|                           | C 39%                            | C 37% 2p                 |

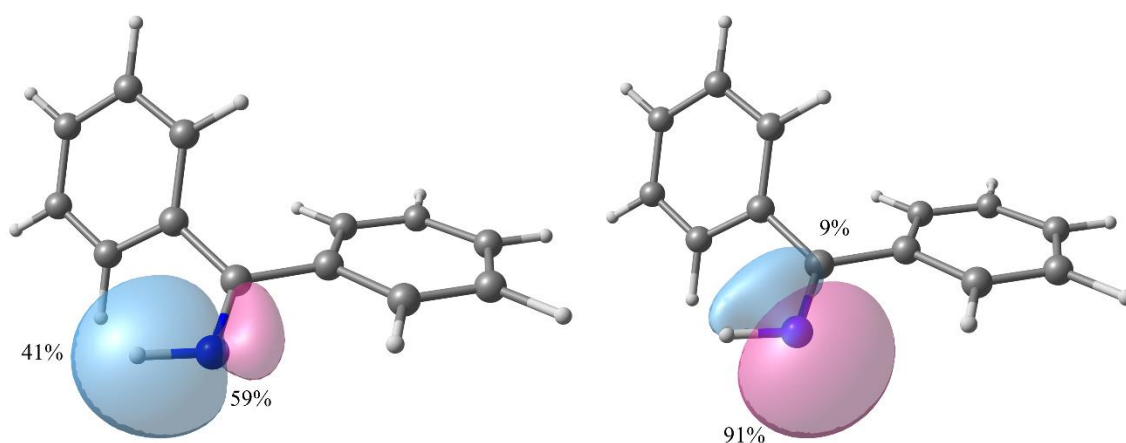

**Figure S59.** Two LMOs of HNCPh<sub>2</sub>. One  $\sigma$ -type (left) for N-H bond and  $\pi$ -lone pair (right) LMOs for N-C bond of free ligand HNCPh<sub>2</sub>. The contour value for LMO isosurface plots is 0.05 a.u. N: blue, C: grey, H: white. Red positive phase, blue negative phase.

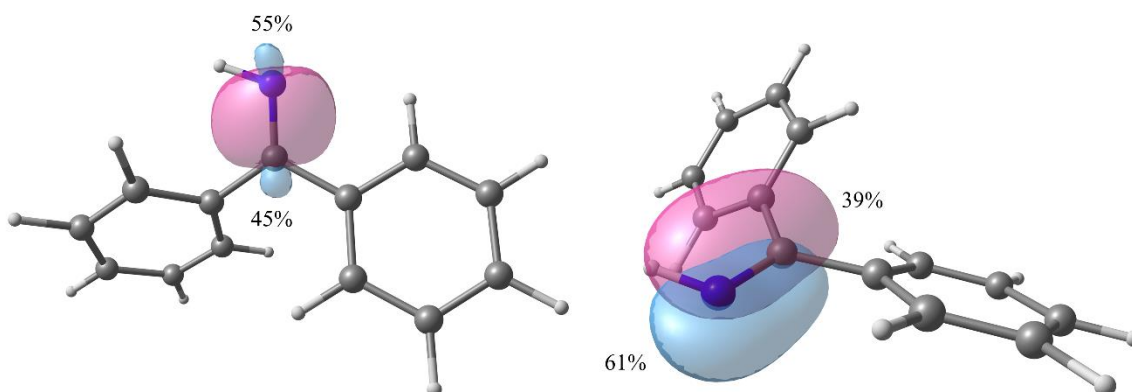

**Figure S60.** Two LMOs of HNCPh<sub>2</sub>. One  $\sigma$ -type (left) for N-C bond and  $\pi$ -type (right) LMOs for N-C bond of free HNCPh<sub>2</sub>. The contour value for LMO isosurface plots is 0.05 a.u. N: blue, C: grey, H: white. Red positive phase, blue negative phase.

**Table S26:** Comparison of the orbital contribution in the LMO bonding analysis of free HNCPh<sub>2</sub>. Orbital contribution below 2% are not listed.

| Bond               | Atom + total contribution to LMO | s/p orbital contribution |
|--------------------|----------------------------------|--------------------------|
| $\sigma$ N-C       | N 55%                            | N 24% 2s, 30% 2p         |
|                    | C 45%                            | C 20% 2s, 25% 2p         |
| $\pi$ N-C          | N 61%                            | N 60% 2p                 |
|                    | C 39%                            | C 37% 2p                 |
| $\pi$ -lone pair N | N 91%                            | N 37% 2s, 54% 2p         |
|                    | C 9%                             | C 6% 2p                  |
| $\sigma$ N-H       | N 59%                            | N 19% 2s, 40% 2p         |
|                    | H 41%                            | H 40% 2s                 |

**Table S27:** Partial atomic charges ( $e^-$ ) of selected atoms in complex **1** obtained from Natural Population Analysis (NPA) and Intrinsic Atomic Orbitals (IAO) analysis. If only a single value is specified for a selection of atoms, then the values for each of the atoms will be the same.

| Atom     | Partial charges / $e^-$<br>NPA method | Partial charges / $e^-$<br>IAO method -<br>IBOViewer | Partial charges / $e^-$<br>IAO method –<br>Turbomole default<br>basis | Partial charges / $e^-$<br>IAO method –<br>Turbomole<br>correction |
|----------|---------------------------------------|------------------------------------------------------|-----------------------------------------------------------------------|--------------------------------------------------------------------|
| Be       | 1.66                                  | 1.48                                                 | 1.94                                                                  | 1.48                                                               |
| Be1/2    | 1.67                                  | 1.51                                                 | 1.95                                                                  | 1.51                                                               |
| N2/3/4/5 | -1.33/-1.32/-<br>1.32/-1.33           | -1.02/-1.00/-0.99/-<br>1.03                          | -1.24/-1.26/-1.26/-<br>1.25                                           | -1.02/-1.00/-0.99/<br>-1.03                                        |
| C2/3/4/5 | 0.14/0.13/0.1<br>3/0.14               | 0.08                                                 | 0.08                                                                  | 0.08                                                               |
| N1/6     | -1.22/-1.22                           | -0.96/-0.96                                          | -1.14/-1.15                                                           | -0.96/-0.96                                                        |
| C1/6     | 0.15                                  | 0.10                                                 | 0.10                                                                  | 0.10                                                               |

**Table S28:** Partial atomic charges ( $e^-$ ) of selected atoms in the free ligand  $H_2NMe_3$  obtained from Natural Population Analysis (NPA) and Intrinsic Atomic Orbitals (IAO) analysis.

| Atom | Partial charges / $e^-$<br>NPA method | Partial charges / $e^-$<br>IAO method -<br>IBOViewer | Partial charges / $e^-$<br>IAO method –<br>Turbomole<br>default basis | Partial charges / $e^-$<br>IAO method –<br>Turbomole<br>correction |
|------|---------------------------------------|------------------------------------------------------|-----------------------------------------------------------------------|--------------------------------------------------------------------|
| N    | -0.79                                 | -0.54                                                | -0.54                                                                 | -0.54                                                              |
| C    | 0.15                                  | 0.10                                                 | 0.10                                                                  | 0.10                                                               |
| H    | 0.38                                  | 0.27                                                 | 0.27                                                                  | 0.27                                                               |

**Table S29:** Partial atomic charges ( $e^-$ ) of selected atoms in complex **2** obtained from Natural Population Analysis (NPA) and Intrinsic Atomic Orbitals (IAO) analysis. Due to symmetry the ligand atoms are equivalent in terms of partial charge.

| Atom             | Partial charges / $e^-$<br>NPA method | Partial charges / $e^-$<br>IAO method -<br>IBOViewer | Partial charges / $e^-$<br>IAO method –<br>Turbomole<br>default basis | Partial charges / $e^-$<br>IAO method –<br>Turbomole<br>correction |
|------------------|---------------------------------------|------------------------------------------------------|-----------------------------------------------------------------------|--------------------------------------------------------------------|
| Be               | 1.66                                  | 1.49                                                 | 1.96                                                                  | 1.49                                                               |
| N <sub>py</sub>  | -0.57                                 | -0.35                                                | -0.44                                                                 | -0.35                                                              |
| N <sub>Mes</sub> | -1.18                                 | -0.93                                                | -1.07                                                                 | -0.93                                                              |
| C <sub>Mes</sub> | 0.17                                  | 0.11                                                 | 0.11                                                                  | 0.11                                                               |
| H <sub>Mes</sub> | 0.36                                  | 0.22                                                 | 0.22                                                                  | 0.22                                                               |

**Table S30:** Partial atomic charges ( $e^-$ ) of selected atoms in complex **3** obtained from Natural Population Analysis (NPA) and Intrinsic Atomic Orbitals (IAO) analysis. Due to symmetry the ligand atoms are equivalent in terms of partial charge.

| Atom          | Partial charges / $e^-$<br>NPA method | Partial charges / $e^-$<br>IAO method -<br>IBOViewer | Partial charges / $e^-$<br>IAO method –<br>Turbomole default<br>basis | Partial charges / $e^-$<br>IAO method –<br>Turbomole<br>correction |
|---------------|---------------------------------------|------------------------------------------------------|-----------------------------------------------------------------------|--------------------------------------------------------------------|
| Be1/2         | 1.66                                  | 1.51                                                 | 1.94                                                                  | 1.51                                                               |
| N2/3 $_{\mu}$ | -1.35                                 | -1.01                                                | -1.25                                                                 | -1.01                                                              |
| C $_{\mu}$    | 0.16                                  | 0.09                                                 | 0.09                                                                  | 0.09                                                               |
| N1/4          | -1.23                                 | -0.95                                                | -1.12                                                                 | -0.95                                                              |
| C             | 0.17                                  | 0.11                                                 | 0.11                                                                  | 0.11                                                               |

**Table S31:** Partial atomic charges ( $e^-$ ) of selected atoms in the free ligand H<sub>2</sub>NDipp obtained from Natural Population Analysis (NPA) and Intrinsic Atomic Orbitals (IAO) analysis.

| Atom | Partial charges<br>/ $e^-$<br>NPA method | Partial charges<br>/ $e^-$<br>IAO method -<br>IBOViewer | Partial charges<br>/ $e^-$<br>IAO method –<br>Turbomole<br>default basis | Partial charges / $e^-$<br>IAO method – Turbomole<br>correction |
|------|------------------------------------------|---------------------------------------------------------|--------------------------------------------------------------------------|-----------------------------------------------------------------|
| N    | -0.79                                    | -0.54                                                   | -0.54                                                                    | -0.54                                                           |
| C    | 0.15                                     | 0.10                                                    | 0.10                                                                     | 0.10                                                            |
| H    | 0.38                                     | 0.27                                                    | 0.27                                                                     | 0.27                                                            |

**Table S32:** Partial atomic charges ( $e^-$ ) of selected atoms in complex **4** obtained from Natural Population Analysis (NPA) and Intrinsic Atomic Orbitals (IAO) analysis. Due to symmetry the ligand atoms are equivalent in terms of partial charge.

| Atom          | Partial charges / $e^-$<br>NPA method | Partial charges<br>/ $e^-$<br>IAO method -<br>IBOViewer | Partial charges<br>/ $e^-$<br>IAO method –<br>Turbomole<br>default basis | Partial charges<br>/ $e^-$<br>IAO method –<br>Turbomole<br>correction |
|---------------|---------------------------------------|---------------------------------------------------------|--------------------------------------------------------------------------|-----------------------------------------------------------------------|
| Be1/2         | 1.66/1.68                             | 1.50/1.51                                               | 1.93/1.94                                                                | 1.50/1.51                                                             |
| N2/3 $_{\mu}$ | -1.36/-1.37                           | -1.03/-1.02                                             | -1.27/-1.27                                                              | -1.03/-1.02                                                           |
| C2/3 $_{\mu}$ | 0.18/0.16                             | 0.11/0.09                                               | 0.11/0.10                                                                | 0.11/0.09                                                             |
| N1/4          | -0.98/-1.01                           | -0.75/-0.79                                             | -0.92/-0.96                                                              | -0.75/-0.79                                                           |
| C1            | 0.14/0.16                             | 0.10/0.12                                               | 0.11/0.12                                                                | 0.10/0.12                                                             |
| C4            | 0.14/0.14                             | 0.11/0.10                                               | 0.11/0.11                                                                | 0.11/0.10                                                             |



**Table S33:** Partial atomic charges ( $e^-$ ) of selected atoms in the free ligand HNPh<sub>2</sub> obtained from Natural Population Analysis (NPA) and Intrinsic Atomic Orbitals (IAO) analysis.

| Atom | Partial charges / $e^-$<br>NPA method | Partial charges / $e^-$<br>IAO method -<br>IBOViewer | Partial charges / $e^-$<br>IAO method –<br>Turbomole default<br>basis | Partial charges / $e^-$<br>IAO method –<br>Turbomole<br>correction |
|------|---------------------------------------|------------------------------------------------------|-----------------------------------------------------------------------|--------------------------------------------------------------------|
| N    | -0.55                                 | -0.31                                                | -0.31                                                                 | -0.31                                                              |
| C    | 0.15                                  | 0.11                                                 | 0.11                                                                  | 0.11                                                               |
| H    | 0.39                                  | 0.28                                                 | 0.28                                                                  | 0.28                                                               |

**Table S34:** Partial atomic charges ( $e^-$ ) of selected atoms in complex 5 obtained from Natural Population Analysis (NPA) and Intrinsic Atomic Orbitals (IAO) analysis. Due to symmetry partial charge of Be1/Be2, N1/N2 and C1/C2 are equal.

| Atom  | Partial charges / $e^-$<br>NPA method | Partial charges / $e^-$<br>IAO method -<br>IBOViewer | Partial charges / $e^-$<br>IAO method –<br>Turbomole<br>default basis | Partial charges / $e^-$<br>IAO method –<br>Turbomole<br>correction |
|-------|---------------------------------------|------------------------------------------------------|-----------------------------------------------------------------------|--------------------------------------------------------------------|
| Be1/2 | 1.61                                  | 1.45                                                 | 1.95                                                                  | 1.45                                                               |
| N1/2  | -1.11                                 | -0.86                                                | -1.08                                                                 | -0.86                                                              |
| C1/2  | -0.72                                 | -0.63                                                | -0.91                                                                 | -0.63                                                              |

**Table S35:** Partial atomic charges ( $e^-$ ) of selected atoms in complex 6 obtained from Natural Population Analysis (NPA) and Intrinsic Atomic Orbitals (IAO) analysis. Data analysis with IBOViewer was not possible, because the program showed file loading problems and crashed. Two different machines and program versions “v20211019-RevA” and “v20150427” were used without success. If only a single value is specified for a selection of atoms, then the values for each of the atoms will be the same.

| Atom     | Partial charges / $e^-$<br>NPA<br>method | Partial charges / $e^-$<br>IAO method -<br>IBOViewer | Partial charges / $e^-$<br>IAO method –<br>Turbomole default<br>basis | Partial charges / $e^-$<br>IAO method –<br>Turbomole<br>correction |
|----------|------------------------------------------|------------------------------------------------------|-----------------------------------------------------------------------|--------------------------------------------------------------------|
| Be       | 1.66                                     | –                                                    | 1.94                                                                  | 1.49                                                               |
| Be1/2    | 1.67                                     | –                                                    | 1.95                                                                  | 1.51                                                               |
| N2/3/4/5 | -1.15                                    | –                                                    | -1.20                                                                 | -0.96                                                              |
| C2/3/4/5 | 0.33                                     | –                                                    | 0.20                                                                  | 0.20                                                               |
| N1/6     | -1.02                                    | –                                                    | -1.08                                                                 | -0.90                                                              |
| C1/6     | 0.27                                     | –                                                    | 0.18                                                                  | 0.17                                                               |

**Table S36:** Partial atomic charges ( $e^-$ ) of selected atoms in the free ligand HNCPh<sub>2</sub> obtained from Natural Population Analysis (NPA) and Intrinsic Atomic Orbitals (IAO) analysis.

| Atom | Partial charges / $e^-$<br>NPA method | Partial charges / $e^-$<br>IAO method -<br>IBOViewer | Partial charges / $e^-$<br>IAO method –<br>Turbomole<br>default basis | Partial charges / $e^-$<br>IAO method –<br>Turbomole<br>correction |
|------|---------------------------------------|------------------------------------------------------|-----------------------------------------------------------------------|--------------------------------------------------------------------|
| N    | -0.59                                 | -0.46                                                | -0.46                                                                 | -0.46                                                              |
| C    | 0.26                                  | 0.18                                                 | 0.18                                                                  | 0.18                                                               |
| H    | 0.34                                  | 0.25                                                 | 0.25                                                                  | 0.25                                                               |

**Table S37:** Changes IAO basis for IAO atomic charges.

```
1 s  eigenvalue=-.47325407295449D+01  nsaos=4  
0.99186043661042D+00-.10048796341397D-050.18193677767313D-010.19036517991340D-02  
2 s  eigenvalue=-.30924859523167D+00  nsaos=4  
0.21907584757841D-040.56272019570987D+000.22803978978015D+000.31779430523373D+00
```

## Coordinates of Optimized Structures

**Table S38:** Coordinates of the optimized structure of **1** in XYZ Ångstrom format.

| atom | x          | y          | z          |
|------|------------|------------|------------|
| H    | -2.9145066 | -4.3903692 | 7.9082250  |
| C    | -6.4358764 | -0.2113461 | -2.8208514 |
| H    | -7.1501864 | 0.3727949  | -2.2375441 |
| H    | -6.2556669 | 0.3308130  | -3.7545403 |
| H    | -6.9066773 | -1.1610721 | -3.0818809 |
| C    | -3.4072402 | -3.1664291 | 6.2036220  |
| C    | -3.6645424 | -3.9031889 | 5.0537983  |
| H    | -4.1132427 | -4.8890721 | 5.1434525  |
| C    | -3.7069900 | -3.7170579 | 7.5649701  |
| H    | -3.7977155 | -2.9178900 | 8.3033529  |
| H    | -4.6392725 | -4.2868485 | 7.5695909  |
| H    | -4.0712749 | -5.2260810 | 2.8676525  |
| C    | -3.6537569 | -4.2608540 | 2.5797727  |
| H    | -2.7471050 | -4.4469984 | 1.9931087  |
| H    | 6.0677494  | 0.8828064  | -7.1922094 |
| C    | 5.4855931  | 1.8065798  | -7.1775051 |
| H    | 4.9798356  | 1.9008315  | -8.1411198 |
| N    | 1.7731024  | 1.9194245  | -2.8353832 |
| H    | 1.1656372  | 2.7193863  | -2.9611295 |
| H    | -1.0457724 | -1.8005981 | -0.3925147 |
| N    | -1.4418745 | -0.9116682 | -0.1011266 |
| H    | -3.0179662 | -2.2028285 | 1.6862883  |
| N    | -2.4839666 | -1.6794394 | 2.3685671  |
| H    | 2.1515202  | -0.1783628 | -0.1052669 |
| N    | 1.4071325  | -0.3380033 | -0.7774393 |
| H    | -0.5616651 | 1.1738084  | 1.9946492  |
| N    | -0.1675442 | 0.2574463  | 1.8028093  |
| H    | -1.0171393 | 1.4960211  | -1.5116379 |
| N    | -0.2169647 | 1.6535289  | -0.9061253 |
| C    | -0.0193659 | -0.9973565 | -3.2112773 |
| H    | -0.8082157 | -0.6299818 | -2.5509252 |
| H    | 0.5265424  | -0.1285647 | -3.5965987 |
| H    | -0.5113215 | -1.4720005 | -4.0606641 |
| C    | 0.8193796  | 4.8739050  | 0.6009021  |
| H    | 1.6428398  | 5.2603709  | 1.1944686  |
| C    | 2.4693937  | -1.4478959 | 3.7629380  |
| H    | 2.8887689  | -2.4455749 | 3.8540011  |
| C    | 1.4247816  | -1.2511096 | 2.8683979  |
| C    | -1.2050870 | 5.2106834  | -0.5861460 |
| H    | -1.9967976 | 5.8656050  | -0.9381286 |
| C    | 0.9108557  | -1.9580649 | -2.5364107 |
| C    | -2.6966051 | -0.7576288 | -0.7373961 |
| C    | -3.5151885 | 0.3436924  | -0.4420761 |
| C    | 1.6372050  | -1.5929716 | -1.3944182 |
| C    | 2.9753681  | -0.4238925 | 4.5505796  |
| C    | 0.8743288  | 0.0299850  | 2.7353851  |
| C    | 1.3200179  | 1.0651820  | 3.5717025  |
| C    | 0.8526643  | 3.5386358  | 0.2194301  |
| C    | -1.2165204 | 3.8822606  | -0.9913083 |
| C    | -0.2111304 | 5.7273822  | 0.2331531  |
| C    | -3.1708126 | -1.7474899 | -1.6132587 |
| C    | 1.1221900  | -3.2118605 | -3.0982506 |
| C    | 2.0453642  | -4.1112220 | -2.5858763 |

|    |            |            |            |
|----|------------|------------|------------|
| H  | 0.5523404  | -3.4820701 | -3.9825227 |
| C  | -0.2066276 | 3.0192228  | -0.5385125 |
| C  | -3.1807491 | 1.2995176  | 0.6627540  |
| H  | -3.2055203 | 0.7796408  | 1.6279715  |
| H  | -2.2021606 | 1.7681946  | 0.5505124  |
| H  | -3.9168835 | 2.1023276  | 0.7116252  |
| C  | 2.8066006  | -3.6955962 | -1.5023367 |
| H  | 3.5778049  | -4.3529541 | -1.1117677 |
| C  | -4.7164886 | 0.4936425  | -1.1248044 |
| H  | -5.3362404 | 1.3544745  | -0.8908049 |
| C  | -0.2452364 | 7.1513698  | 0.6966179  |
| H  | 0.7617177  | 7.5407875  | 0.8582041  |
| H  | -0.7452197 | 7.7942063  | -0.0303740 |
| H  | -0.7875951 | 7.2455568  | 1.6427520  |
| C  | -2.2537791 | 3.4085479  | -1.9643457 |
| H  | -2.8475634 | 2.5699125  | -1.5927044 |
| H  | -2.9448692 | 4.2155552  | -2.2074787 |
| H  | -1.7935347 | 3.0804927  | -2.9036817 |
| C  | 4.1302388  | -0.6533588 | 5.4764570  |
| H  | 4.1533795  | -1.6844857 | 5.8339846  |
| H  | 5.0832747  | -0.4600621 | 4.9739178  |
| H  | 4.0803545  | 0.0061204  | 6.3449323  |
| C  | 2.0552537  | 2.7079834  | 0.5451737  |
| H  | 1.8047461  | 1.7622186  | 1.0294001  |
| H  | 2.6204581  | 2.4892128  | -0.3686534 |
| H  | 2.7241766  | 3.2419324  | 1.2204376  |
| C  | -4.3797073 | -1.5537278 | -2.2684193 |
| H  | -4.7278187 | -2.3246267 | -2.9496652 |
| C  | 0.8582440  | -2.4174434 | 2.1203543  |
| H  | -0.1560234 | -2.6487778 | 2.4644269  |
| H  | 0.8158062  | -2.2492305 | 1.0410335  |
| H  | 1.4665291  | -3.3087751 | 2.2753423  |
| C  | -2.4345433 | -3.0421256 | -1.7809457 |
| H  | -2.9548375 | -3.6872161 | -2.4888856 |
| H  | -1.4113019 | -2.9181464 | -2.1417123 |
| H  | -2.3723015 | -3.5851917 | -0.8306562 |
| C  | 3.5766068  | -2.0116569 | 0.1705795  |
| H  | 4.2192447  | -2.8368400 | 0.4776105  |
| H  | 4.2278179  | -1.2080451 | -0.1908431 |
| H  | 3.0747995  | -1.6396738 | 1.0657838  |
| C  | 2.2198753  | -5.4733180 | -3.1838166 |
| H  | 1.5717209  | -6.2056842 | -2.6921578 |
| H  | 1.9680756  | -5.4756413 | -4.2459135 |
| H  | 3.2477207  | -5.8254428 | -3.0775520 |
| C  | -5.1601261 | -0.4242802 | -2.0655979 |
| C  | 2.3673991  | 0.8197315  | 4.4501245  |
| H  | 2.7060039  | 1.6294152  | 5.0897915  |
| C  | 0.6236111  | 2.3914518  | 3.5983773  |
| H  | 1.1511584  | 3.0865593  | 4.2516123  |
| H  | 0.5436954  | 2.8637219  | 2.6170180  |
| H  | -0.3948602 | 2.2871585  | 3.9891009  |
| C  | 2.6348508  | -2.4527635 | -0.9075940 |
| Be | -0.0899053 | 0.1853578  | 0.0274200  |
| Be | -1.4315831 | -0.8346694 | 1.5929084  |
| Be | 1.1775117  | 1.0687354  | -1.6754285 |
| C  | -2.5352422 | -1.3855221 | 4.7888318  |
| C  | -2.8480066 | -1.9081639 | 6.0375520  |
| H  | -2.6564025 | -1.2949567 | 6.9142277  |

|   |            |            |            |
|---|------------|------------|------------|
| C | -3.3651750 | -3.4246659 | 3.7882362  |
| C | -2.7811265 | -2.1499784 | 3.6374773  |
| C | -1.9667597 | -0.0088324 | 4.6820187  |
| H | -0.8947402 | -0.0327184 | 4.4705384  |
| H | -2.4498925 | 0.5535095  | 3.8770274  |
| H | -2.1050383 | 0.5408635  | 5.6144324  |
| H | -4.3765197 | -3.7816813 | 1.9075932  |
| C | 3.8731306  | 1.1319743  | -3.7926983 |
| C | 4.7483680  | 1.1145727  | -4.8709296 |
| H | 5.6627534  | 0.5338438  | -4.7812053 |
| C | 4.5053938  | 1.8151635  | -6.0434927 |
| C | 3.3313795  | 2.5549953  | -6.1083676 |
| H | 3.1063268  | 3.1157398  | -7.0118269 |
| C | 2.4267204  | 2.5988977  | -5.0590836 |
| C | 2.6846631  | 1.8749575  | -3.8770657 |
| C | 4.2101066  | 0.3762545  | -2.5500068 |
| H | 4.0282457  | 0.9858344  | -1.6592165 |
| H | 3.6089860  | -0.5316804 | -2.4555545 |
| H | 5.2594703  | 0.0771110  | -2.5507256 |
| H | 6.1948824  | 2.6374876  | -7.1008866 |
| C | 1.1679934  | 3.4005220  | -5.1841504 |
| H | 1.1116851  | 4.2020691  | -4.4370851 |
| H | 1.1037767  | 3.8694920  | -6.1663829 |
| H | 0.2772021  | 2.7762446  | -5.0501146 |

**Table S39:** Coordinates of the optimized structure of **2** in XYZ Ångstrom format.

| atom | x          | y          | z          |
|------|------------|------------|------------|
| H    | 0.8278084  | -2.0392275 | -1.1349328 |
| N    | 0.9732648  | -1.1140475 | -0.7539215 |
| C    | 1.2044417  | -1.2402305 | 0.6074399  |
| C    | 0.9472902  | -2.4534520 | 1.2781370  |
| C    | 1.0899454  | -2.5300731 | 2.6569812  |
| H    | 0.8633242  | -3.4721373 | 3.1505033  |
| C    | 1.7039333  | -0.1611570 | 1.3633275  |
| C    | 0.5073501  | -3.6596405 | 0.5064730  |
| H    | -0.4399558 | -3.4922891 | -0.0190311 |
| H    | 0.3683952  | -4.5131950 | 1.1714045  |
| H    | 1.2458204  | -3.9531915 | -0.2507636 |
| C    | 2.1574940  | 1.0945780  | 0.6902121  |
| H    | 3.0504451  | 0.9089118  | 0.0826723  |
| H    | 2.4059980  | 1.8581511  | 1.4286368  |
| H    | 1.3930539  | 1.5030351  | 0.0287358  |
| C    | -0.4674434 | -1.8749263 | -3.4815657 |
| N    | -1.0039583 | -0.9423750 | -2.6940100 |
| H    | 0.6066394  | -2.0038998 | -3.4033674 |
| C    | -1.2230204 | -2.6399269 | -4.3477273 |
| H    | -0.7454967 | -3.3900644 | -4.9646907 |
| C    | -2.5920579 | -2.4224848 | -4.4025173 |
| H    | -3.2153449 | -3.0063789 | -5.0696396 |
| C    | -3.1466022 | -1.4471355 | -3.5917104 |
| H    | -4.2096628 | -1.2434147 | -3.6020200 |
| C    | -2.3170361 | -0.7272196 | -2.7495613 |
| H    | -2.6678105 | 0.0493253  | -2.0772255 |
| Be   | 0.0000000  | 0.0000000  | -1.4877802 |
| N    | -0.9732648 | 1.1140475  | -0.7539215 |
| H    | -0.8278084 | 2.0392275  | -1.1349328 |

|   |            |            |            |
|---|------------|------------|------------|
| N | 1.0039583  | 0.9423750  | -2.6940100 |
| C | -1.2044417 | 1.2402305  | 0.6074399  |
| C | -0.9472902 | 2.4534520  | 1.2781370  |
| C | -1.0899454 | 2.5300731  | 2.6569812  |
| H | -0.8633242 | 3.4721373  | 3.1505033  |
| C | -1.7039333 | 0.1611570  | 1.3633275  |
| C | -0.5073501 | 3.6596405  | 0.5064730  |
| H | 0.4399558  | 3.4922891  | -0.0190311 |
| H | -0.3683952 | 4.5131950  | 1.1714045  |
| H | -1.2458204 | 3.9531915  | -0.2507636 |
| C | -2.1574940 | -1.0945780 | 0.6902121  |
| H | -3.0504451 | -0.9089118 | 0.0826723  |
| H | -2.4059980 | -1.8581511 | 1.4286368  |
| H | -1.3930539 | -1.5030351 | 0.0287358  |
| C | 0.4674434  | 1.8749263  | -3.4815657 |
| H | -0.6066394 | 2.0038998  | -3.4033674 |
| C | 1.2230204  | 2.6399269  | -4.3477273 |
| H | 0.7454967  | 3.3900644  | -4.9646907 |
| C | 2.5920579  | 2.4224848  | -4.4025173 |
| H | 3.2153449  | 3.0063789  | -5.0696396 |
| C | 3.1466022  | 1.4471355  | -3.5917104 |
| H | 4.2096628  | 1.2434147  | -3.6020200 |
| C | 2.3170361  | 0.7272196  | -2.7495613 |
| H | 2.6678105  | -0.0493253 | -2.0772255 |
| C | 1.4922261  | -1.4443144 | 3.4207793  |
| C | 1.8153230  | -0.2779549 | 2.7392392  |
| H | 2.1683969  | 0.5827066  | 3.3012183  |
| C | 1.5507715  | -1.5155190 | 4.9162458  |
| H | 0.6046374  | -1.1958916 | 5.3669303  |
| H | 2.3339813  | -0.8670768 | 5.3163450  |
| H | 1.7474100  | -2.5333446 | 5.2612928  |
| C | -1.4922261 | 1.4443144  | 3.4207793  |
| C | -1.8153230 | 0.2779549  | 2.7392392  |
| H | -2.1683969 | -0.5827066 | 3.3012183  |
| C | -1.5507715 | 1.5155190  | 4.9162458  |
| H | -0.6046374 | 1.1958916  | 5.3669303  |
| H | -2.3339813 | 0.8670768  | 5.3163450  |
| H | -1.7474100 | 2.5333446  | 5.2612928  |

**Table S40:** Coordinates of the optimized structure of **3** in XYZ Ångstrom format.

| atom | x          | y          | z          |
|------|------------|------------|------------|
| H    | -0.4061802 | -0.0105056 | -2.9216276 |
| N    | -0.9786219 | -0.6340782 | -2.3667307 |
| C    | -1.8184090 | -1.3293090 | -3.2191466 |
| C    | -1.8083014 | -1.0287961 | -4.6050789 |
| C    | -2.6722785 | -2.3471056 | -2.7474656 |
| C    | -1.1381023 | -1.5427771 | 1.5972440  |
| N    | -0.9683743 | -0.4736811 | 0.6871318  |
| C    | -0.3163842 | -2.6777169 | 1.4975764  |
| C    | -2.1099274 | -1.4471802 | 2.6130919  |
| C    | -2.7776473 | -2.6235913 | -1.2714782 |
| H    | -1.8005842 | -2.4170114 | -0.8258471 |
| C    | -3.0530183 | -0.2603032 | 2.6864438  |
| H    | -3.3001922 | 0.0310535  | 1.6571023  |
| C    | -2.6194914 | -1.7556669 | -5.4631733 |
| H    | -2.6054061 | -1.5308100 | -6.5225364 |

|    |            |            |            |
|----|------------|------------|------------|
| C  | -0.4455268 | -3.6788614 | 2.4522969  |
| H  | 0.1893873  | -4.5544608 | 2.3898562  |
| C  | -0.9598048 | 0.1087947  | -5.1324275 |
| H  | 0.0107002  | 0.0828014  | -4.6205696 |
| C  | 0.7077437  | -2.8330648 | 0.3946268  |
| H  | 0.4287274  | -2.1658504 | -0.4355818 |
| C  | -3.7919249 | -1.6728226 | -0.6399396 |
| H  | -4.7850005 | -1.8609431 | -1.0560418 |
| H  | -3.5426129 | -0.6302260 | -0.8500948 |
| H  | -3.8427480 | -1.8180685 | 0.4415687  |
| C  | -2.1996521 | -2.4777294 | 3.5404390  |
| H  | -2.9413090 | -2.4210679 | 4.3269480  |
| C  | -1.3677821 | -3.5817558 | 3.4765398  |
| H  | -1.4505256 | -4.3707156 | 4.2142803  |
| C  | -3.4655155 | -3.0451698 | -3.6475653 |
| H  | -4.1150241 | -3.8298596 | -3.2776617 |
| C  | -4.3878119 | -0.5938010 | 3.3397746  |
| H  | -4.8475615 | -1.4766317 | 2.8909420  |
| H  | -5.0757624 | 0.2461705  | 3.2232002  |
| H  | -4.2782296 | -0.7732720 | 4.4119555  |
| H  | -4.0698409 | -3.3242791 | -5.6890941 |
| C  | -3.4469817 | -2.7650880 | -5.0012645 |
| C  | -2.4233379 | 0.9516349  | 3.3726671  |
| H  | -2.2081573 | 0.7232789  | 4.4197719  |
| H  | -3.1117388 | 1.8005052  | 3.3514502  |
| H  | -1.4866329 | 1.2596883  | 2.9046852  |
| C  | -3.1214017 | -4.0631076 | -0.9156874 |
| H  | -4.1543932 | -4.3090502 | -1.1740700 |
| H  | -3.0092383 | -4.2150464 | 0.1609279  |
| H  | -2.4708513 | -4.7711773 | -1.4336168 |
| C  | 2.1098092  | -2.4410506 | 0.8547778  |
| H  | 2.1336256  | -1.4449967 | 1.3044349  |
| H  | 2.8150401  | -2.4727002 | 0.0191707  |
| H  | 2.4625847  | -3.1428427 | 1.6147003  |
| C  | 0.7159331  | -4.2260545 | -0.2234601 |
| H  | 1.0920605  | -4.9723656 | 0.4793683  |
| H  | 1.3697334  | -4.2417994 | -1.0982878 |
| H  | -0.2840131 | -4.5260917 | -0.5376219 |
| H  | -1.5260898 | 0.1598618  | -7.2345504 |
| C  | -0.6367148 | 0.0146082  | -6.6163100 |
| H  | -0.1993604 | -0.9527278 | -6.8730024 |
| H  | 0.0761042  | 0.7967108  | -6.8888002 |
| C  | -1.6107762 | 1.4574759  | -4.8206603 |
| H  | -2.5522401 | 1.5496415  | -5.3685181 |
| H  | -0.9570081 | 2.2840612  | -5.1092862 |
| H  | -1.8318357 | 1.5602926  | -3.7575010 |
| Be | -0.4610484 | -0.4729197 | -0.9121733 |
| H  | -1.7864621 | 0.1242497  | 0.7424169  |
| H  | 0.4061802  | 0.0105056  | 2.9216276  |
| N  | 0.9786219  | 0.6340782  | 2.3667307  |
| N  | 0.9683743  | 0.4736811  | -0.6871318 |
| C  | 1.8184090  | 1.3293090  | 3.2191466  |
| C  | 1.8083014  | 1.0287961  | 4.6050789  |
| C  | 2.6722785  | 2.3471056  | 2.7474656  |
| C  | 1.1381023  | 1.5427771  | -1.5972440 |
| C  | 0.3163842  | 2.6777169  | -1.4975764 |
| C  | 2.1099274  | 1.4471802  | -2.6130919 |
| C  | 2.7776473  | 2.6235913  | 1.2714782  |

|    |            |            |            |
|----|------------|------------|------------|
| H  | 1.8005842  | 2.4170114  | 0.8258471  |
| C  | 3.0530183  | 0.2603032  | -2.6864438 |
| H  | 3.3001922  | -0.0310535 | -1.6571023 |
| C  | 2.6194914  | 1.7556669  | 5.4631733  |
| H  | 2.6054061  | 1.5308100  | 6.5225364  |
| C  | 0.4455268  | 3.6788614  | -2.4522969 |
| H  | -0.1893873 | 4.5544608  | -2.3898562 |
| C  | 0.9598048  | -0.1087947 | 5.1324275  |
| H  | -0.0107002 | -0.0828014 | 4.6205696  |
| C  | -0.7077437 | 2.8330648  | -0.3946268 |
| H  | -0.4287274 | 2.1658504  | 0.4355818  |
| C  | 3.7919249  | 1.6728226  | 0.6399396  |
| H  | 3.5426129  | 0.6302260  | 0.8500948  |
| H  | 3.8427480  | 1.8180685  | -0.4415687 |
| C  | 2.1996521  | 2.4777294  | -3.5404390 |
| H  | 2.9413090  | 2.4210679  | -4.3269480 |
| C  | 1.3677821  | 3.5817558  | -3.4765398 |
| H  | 1.4505256  | 4.3707156  | -4.2142803 |
| C  | 3.4655155  | 3.0451698  | 3.6475653  |
| C  | 4.3878119  | 0.5938010  | -3.3397746 |
| H  | 4.8475615  | 1.4766317  | -2.8909420 |
| H  | 5.0757624  | -0.2461705 | -3.2232002 |
| H  | 4.2782296  | 0.7732720  | -4.4119555 |
| C  | 3.4469817  | 2.7650880  | 5.0012645  |
| C  | 2.4233379  | -0.9516349 | -3.3726671 |
| H  | 2.2081573  | -0.7232789 | -4.4197719 |
| H  | 3.1117388  | -1.8005052 | -3.3514502 |
| H  | 1.4866329  | -1.2596883 | -2.9046852 |
| C  | 3.1214017  | 4.0631076  | 0.9156874  |
| H  | 4.1543932  | 4.3090502  | 1.1740700  |
| H  | 3.0092383  | 4.2150464  | -0.1609279 |
| H  | 2.4708513  | 4.7711773  | 1.4336168  |
| C  | -2.1098092 | 2.4410506  | -0.8547778 |
| H  | -2.1336256 | 1.4449967  | -1.3044349 |
| H  | -2.8150401 | 2.4727002  | -0.0191707 |
| H  | -2.4625847 | 3.1428427  | -1.6147003 |
| C  | -0.7159331 | 4.2260545  | 0.2234601  |
| H  | -1.0920605 | 4.9723656  | -0.4793683 |
| H  | -1.3697334 | 4.2417994  | 1.0982878  |
| H  | 0.2840131  | 4.5260917  | 0.5376219  |
| C  | 0.6367148  | -0.0146082 | 6.6163100  |
| H  | 0.1993604  | 0.9527278  | 6.8730024  |
| H  | -0.0761042 | -0.7967108 | 6.8888002  |
| C  | 1.6107762  | -1.4574759 | 4.8206603  |
| H  | 2.5522401  | -1.5496415 | 5.3685181  |
| H  | 0.9570081  | -2.2840612 | 5.1092862  |
| H  | 1.8318357  | -1.5602926 | 3.7575010  |
| Be | 0.4610484  | 0.4729197  | 0.9121733  |
| H  | 1.7864621  | -0.1242497 | -0.7424169 |
| H  | 1.5260898  | -0.1598618 | 7.2345504  |
| H  | 4.7850005  | 1.8609431  | 1.0560418  |
| H  | 4.1150241  | 3.8298596  | 3.2776617  |
| H  | 4.0698409  | 3.3242791  | 5.6890941  |

**Table S41:** Coordinates of the optimized structure of **4** in XYZ Ångstrom format.

| atom | x | y | z |
|------|---|---|---|
|------|---|---|---|



---

|    |            |            |            |
|----|------------|------------|------------|
| N  | 1.2128949  | -1.3107362 | -2.0894933 |
| C  | 2.3054621  | -2.1682153 | -2.1740275 |
| N  | 0.9527108  | -0.4681877 | 0.8310167  |
| C  | 1.1987104  | -1.5522795 | 1.7150965  |
| C  | 0.4063788  | -1.1870679 | -3.2529579 |
| C  | 3.0311484  | -2.5051855 | -1.0232607 |
| H  | 2.7200189  | -2.1206267 | -0.0617475 |
| C  | 2.1542844  | -1.4053221 | 2.7340110  |
| C  | 0.4744914  | -2.7439488 | 1.5724750  |
| C  | 4.1265138  | -3.3453962 | -1.0871619 |
| H  | 4.6564787  | -3.5866249 | -0.1720003 |
| C  | 2.7319120  | -2.7186912 | -3.3898446 |
| H  | 2.1979020  | -2.4803854 | -4.3009257 |
| C  | 2.9136110  | -0.1045417 | 2.8875546  |
| H  | 2.1960309  | 0.7100572  | 2.7199574  |
| C  | 2.3704949  | -2.4694597 | 3.5978000  |
| H  | 3.0971136  | -2.3690104 | 4.3937117  |
| C  | 0.5130623  | -0.0792992 | -4.0857097 |
| H  | 1.2542576  | 0.6759942  | -3.8573452 |
| C  | 4.5417777  | -3.8846080 | -2.2977248 |
| C  | 3.8312486  | -3.5608656 | -3.4429295 |
| H  | 4.1344977  | -3.9675841 | -4.4016669 |
| C  | -0.5441188 | -2.1620578 | -3.5544188 |
| H  | -0.6142899 | -3.0358064 | -2.9157190 |
| C  | 0.7173308  | -3.7764624 | 2.4704536  |
| H  | 0.1674169  | -4.7041366 | 2.3736411  |
| C  | 1.6570761  | -3.6488268 | 3.4762768  |
| H  | 1.8358565  | -4.4680087 | 4.1625112  |
| C  | 4.0402694  | 0.0082568  | 1.8565081  |
| H  | 3.7020158  | -0.1306172 | 0.8262994  |
| C  | 3.4675922  | 0.1223878  | 4.2860091  |
| H  | 2.6859133  | 0.0257938  | 5.0406218  |
| C  | -0.3234495 | 0.0654109  | -5.1828779 |
| H  | -0.2373642 | 0.9459504  | -5.8089008 |
| C  | -1.3757602 | -2.0230508 | -4.6541167 |
| H  | -2.1127432 | -2.7878296 | -4.8721280 |
| C  | -1.2701485 | -0.9050868 | -5.4710282 |
| H  | -1.9240539 | -0.7927240 | -6.3279408 |
| Be | 0.6395683  | -0.5643644 | -0.8310626 |
| H  | 1.6940969  | 0.2117536  | 0.9705064  |
| C  | -0.5671426 | -2.9058205 | 0.4887205  |
| C  | -0.6676822 | -4.3260932 | -0.0506495 |
| H  | -1.3375338 | -4.3491270 | -0.9134862 |
| H  | -1.0787675 | -5.0145745 | 0.6911909  |
| H  | 0.3096313  | -4.6968318 | -0.3643176 |
| H  | -0.2465973 | -2.3095581 | -0.3759710 |
| C  | -1.9382230 | -2.4020699 | 0.9345842  |
| H  | -2.6590028 | -2.4558375 | 0.1138895  |
| H  | -1.9174767 | -1.3692165 | 1.2968130  |
| H  | -2.3175627 | -3.0149411 | 1.7564035  |
| N  | -0.7392480 | 0.4205600  | -0.8448963 |
| N  | -1.1865843 | 1.2198119  | 1.9954973  |
| C  | -2.2575439 | 2.1191503  | 1.8061428  |
| C  | -0.9092433 | 1.5512171  | -1.6841746 |
| C  | -0.7947884 | 1.0492260  | 3.3422435  |
| C  | -2.2129394 | 3.1095590  | 0.8276670  |
| H  | -1.3220174 | 3.2305774  | 0.2272599  |

---

|    |            |            |            |
|----|------------|------------|------------|
| C  | -2.1171204 | 1.7191624  | -2.3816152 |
| C  | 0.1280272  | 2.4868392  | -1.8117387 |
| C  | -3.2998098 | 3.9430628  | 0.6088247  |
| H  | -3.2387490 | 4.6952981  | -0.1694366 |
| C  | -3.4120631 | 2.0150146  | 2.5886380  |
| H  | -3.4537933 | 1.2575418  | 3.3630844  |
| C  | -3.1852521 | 0.6455022  | -2.3430309 |
| H  | -2.6671054 | -0.3224268 | -2.4086152 |
| C  | -2.2972985 | 2.8788099  | -3.1209861 |
| H  | -3.2253370 | 3.0270692  | -3.6580471 |
| C  | -0.6769663 | -0.2142437 | 3.9149543  |
| H  | -0.9211491 | -1.0902778 | 3.3290389  |
| C  | -4.4452660 | 3.8222515  | 1.3783843  |
| H  | -5.2923738 | 4.4768053  | 1.2110574  |
| C  | -4.4896733 | 2.8554201  | 2.3759629  |
| H  | -5.3772702 | 2.7497447  | 2.9898596  |
| C  | -0.5034989 | 2.1650659  | 4.1340253  |
| H  | -0.6070718 | 3.1537719  | 3.7011447  |
| C  | -0.1026159 | 3.6354540  | -2.5599986 |
| H  | 0.6845547  | 4.3733095  | -2.6560622 |
| C  | -1.3114136 | 3.8477888  | -3.1954190 |
| H  | -1.4749777 | 4.7510077  | -3.7710425 |
| C  | -4.0005475 | 0.6791107  | -1.0494814 |
| H  | -4.7212024 | -0.1425208 | -1.0334175 |
| H  | -4.5510495 | 1.6191736  | -0.9738754 |
| H  | -3.3844672 | 0.6088294  | -0.1524631 |
| C  | -4.1209667 | 0.6823148  | -3.5428600 |
| H  | -4.7595183 | -0.2036894 | -3.5378101 |
| H  | -4.7789395 | 1.5545485  | -3.5124317 |
| H  | -3.5657616 | 0.6964214  | -4.4819825 |
| C  | -0.2591332 | -0.3625708 | 5.2299088  |
| H  | -0.1683076 | -1.3592708 | 5.6462115  |
| C  | -0.0971624 | 2.0154133  | 5.4474614  |
| H  | 0.1255521  | 2.8947110  | 6.0415894  |
| C  | 0.0310999  | 0.7483622  | 6.0046405  |
| H  | 0.3498121  | 0.6321950  | 7.0338119  |
| Be | -0.4576405 | 0.4877837  | 0.8226273  |
| H  | -1.5385739 | -0.1898700 | -0.9891465 |
| C  | 1.4779406  | 2.2725458  | -1.1610691 |
| H  | 1.6401535  | 1.1879655  | -1.0831067 |
| C  | 1.5591629  | 2.8784087  | 0.2387770  |
| H  | 2.5244065  | 2.6560362  | 0.7027881  |
| H  | 1.4597625  | 3.9651332  | 0.1789339  |
| H  | 0.7691555  | 2.5265649  | 0.9086529  |
| C  | 2.6432641  | 2.7696469  | -2.0082627 |
| H  | 3.5880700  | 2.4418033  | -1.5694197 |
| H  | 2.6679643  | 3.8603906  | -2.0565953 |
| H  | 2.5914416  | 2.3860090  | -3.0283796 |
| H  | 5.3989042  | -4.5450227 | -2.3452527 |
| H  | 4.7930770  | -0.7614530 | 2.0437040  |
| H  | 4.5294356  | 0.9833566  | 1.9237942  |
| H  | 3.8837884  | 1.1295390  | 4.3570737  |
| H  | 4.2730158  | -0.5784660 | 4.5202179  |

**Table S42:** Coordinates of the optimized structure of  $[(\text{Ph}_2\text{N})\text{BePh}]_2$  in XYZ Ångstrom format.

| atom | x | y | z |
|------|---|---|---|
|------|---|---|---|

---

|    |            |            |            |
|----|------------|------------|------------|
| N  | -0.7307039 | -0.1058673 | -1.0551535 |
| Be | 0.8058224  | -0.5808247 | -0.4876309 |
| H  | 0.8173417  | -2.0652959 | -2.9274371 |
| C  | 1.7089038  | -2.3091506 | -2.3552072 |
| Be | -0.8782206 | 0.3047206  | 0.5988809  |
| C  | 2.6121879  | -3.2131381 | -2.8968383 |
| H  | 2.4265244  | -3.6516974 | -3.8716084 |
| H  | 3.2607397  | -1.6882792 | 0.5795786  |
| C  | 3.0661890  | -2.0980194 | -0.4088301 |
| C  | 0.8234727  | -1.6517930 | 2.3801216  |
| C  | 1.1700564  | -0.3162262 | 2.1855376  |
| H  | 0.3263732  | -2.1999147 | 1.5860281  |
| C  | 1.1318984  | -2.2935451 | 3.5655134  |
| H  | 0.8544594  | -3.3329868 | 3.6952650  |
| C  | 1.7987518  | -1.6164762 | 4.5768666  |
| H  | 2.0425553  | -2.1195182 | 5.5045507  |
| C  | 2.1529130  | -0.2909247 | 4.3825772  |
| H  | 2.6762774  | 0.2509558  | 5.1620210  |
| C  | 1.8425325  | 0.3604030  | 3.1980251  |
| H  | 2.1196227  | 1.3979594  | 3.0601959  |
| C  | 2.7123053  | 1.6363675  | 0.2222297  |
| C  | 1.4030260  | 1.5857064  | 0.6916991  |
| H  | 3.2727557  | 0.7148379  | 0.1128624  |
| C  | 3.2790040  | 2.8530213  | -0.1197861 |
| C  | 2.5435580  | 4.0243176  | -0.0016407 |
| H  | 2.9846909  | 4.9735421  | -0.2816780 |
| C  | 1.2426513  | 3.9761310  | 0.4750801  |
| H  | 0.6621558  | 4.8858911  | 0.5709390  |
| C  | 0.6764435  | 2.7618076  | 0.8323964  |
| H  | -0.3380365 | 2.7206657  | 1.2172808  |
| C  | -2.2358249 | 0.4713955  | 1.6037075  |
| C  | -2.0957460 | 0.8467269  | 2.9471760  |
| H  | -1.1014454 | 0.9933488  | 3.3616187  |
| C  | -3.1901447 | 1.0284412  | 3.7812882  |
| H  | -3.0444424 | 1.3182532  | 4.8165418  |
| C  | -4.4728838 | 0.8328606  | 3.2899929  |
| H  | -5.3319171 | 0.9705422  | 3.9375661  |
| C  | -4.6504434 | 0.4532957  | 1.9667806  |
| H  | -5.6505972 | 0.2914654  | 1.5787921  |
| C  | -3.5462684 | 0.2774539  | 1.1451783  |
| H  | -3.7146074 | -0.0353999 | 0.1173185  |
| C  | -0.6843219 | 1.1313032  | -1.7909938 |
| C  | -1.7430682 | 2.0308921  | -1.7069962 |
| H  | -2.6164866 | 1.7690751  | -1.1205841 |
| C  | -1.6651300 | 3.2545144  | -2.3512122 |
| H  | -2.4901751 | 3.9530589  | -2.2750637 |
| C  | -0.5309250 | 3.5910698  | -3.0771979 |
| H  | -0.4670303 | 4.5539520  | -3.5699893 |
| C  | 0.5202124  | 2.6918859  | -3.1695878 |
| H  | 1.4086714  | 2.9466383  | -3.7348745 |
| C  | 0.4401832  | 1.4598171  | -2.5383742 |
| H  | 1.2559751  | 0.7477146  | -2.6179722 |
| C  | -1.5521767 | -1.1301006 | -1.6012878 |
| C  | -2.0308663 | -1.0864928 | -2.9067698 |
| H  | -1.8051453 | -0.2338026 | -3.5346596 |
| C  | -2.7910064 | -2.1346309 | -3.4040818 |
| H  | -3.1554084 | -2.0856761 | -4.4238343 |

---

|   |            |            |            |
|---|------------|------------|------------|
| C | -3.0823177 | -3.2360582 | -2.6151891 |
| H | -3.6753350 | -4.0521666 | -3.0093769 |
| C | -2.6089314 | -3.2782898 | -1.3113071 |
| H | -2.8338074 | -4.1269544 | -0.6761607 |
| C | -1.8544056 | -2.2346951 | -0.8074183 |
| H | -1.5133642 | -2.2665065 | 0.2224746  |
| N | 0.7865098  | 0.3142750  | 0.9700618  |
| C | 1.9067192  | -1.7185624 | -1.0992530 |
| C | 3.7520409  | -3.5603221 | -2.1860586 |
| H | 4.4601573  | -4.2683076 | -2.6026799 |
| C | 3.9777767  | -3.0016514 | -0.9356996 |
| H | 4.8633895  | -3.2749099 | -0.3717402 |
| H | 4.2963358  | 2.8838777  | -0.4919733 |

**Table S43:** Coordinates of the optimized structure of **5** in XYZ Ångstrom format.

| atom | x          | y          | z          |
|------|------------|------------|------------|
| C    | -4.2885329 | 3.3922331  | -2.2182405 |
| C    | -3.2924726 | 4.0318976  | -2.9518346 |
| H    | -4.0198771 | 2.9487169  | -1.2658615 |
| C    | -5.5869357 | 3.3379781  | -2.6945848 |
| H    | -6.3587626 | 2.8531722  | -2.1070502 |
| C    | -5.9022647 | 3.9066238  | -3.9228059 |
| H    | -6.9172720 | 3.8579760  | -4.3004419 |
| C    | -4.9157704 | 4.5441390  | -4.6605998 |
| H    | -5.1568867 | 4.9878575  | -5.6200350 |
| C    | -3.6198449 | 4.6192959  | -4.1703735 |
| H    | -2.8497851 | 5.1247724  | -4.7426276 |
| C    | -3.9990200 | 5.1922749  | 1.5064035  |
| H    | -4.5649726 | 6.1167413  | 1.4973013  |
| C    | -4.5692502 | 4.0345050  | 2.0172796  |
| H    | -5.5810232 | 4.0518072  | 2.4055691  |
| C    | -3.8432774 | 2.8543247  | 2.0346272  |
| H    | -4.2826527 | 1.9504768  | 2.4418107  |
| H    | -2.2003034 | -5.8411317 | 3.6836767  |
| C    | -1.1552201 | -5.6957716 | 3.9339128  |
| C    | -0.6482520 | -6.2033775 | 5.1241621  |
| C    | 0.6940059  | -6.0331875 | 5.4296310  |
| H    | -1.2980342 | -6.7363955 | 5.8089184  |
| H    | 1.0935842  | -6.4263175 | 6.3576862  |
| C    | -1.8913863 | 4.0110895  | -2.4333274 |
| N    | -1.4422330 | 3.0136504  | -1.8364608 |
| C    | -1.0476475 | 5.2244708  | -2.6535797 |
| C    | 0.3122496  | 5.0598764  | -2.9044258 |
| H    | 0.7011839  | 4.0510010  | -2.9861823 |
| C    | 0.9283052  | 0.3747365  | -2.5773621 |
| N    | 0.2838404  | 0.6969343  | -1.5343543 |
| C    | 1.9038425  | -0.7475943 | -2.5755915 |
| C    | 2.7239030  | -0.9756383 | -1.4730870 |
| H    | 2.6774621  | -0.2980637 | -0.6301413 |
| C    | 3.5831900  | -2.0609650 | -1.4447598 |
| H    | 4.2088821  | -2.2334578 | -0.5772977 |
| C    | 3.6226110  | -2.9424004 | -2.5167730 |
| H    | 4.2823449  | -3.8018673 | -2.4864878 |
| C    | 2.8109193  | -2.7239800 | -3.6205088 |
| H    | 2.8327284  | -3.4139882 | -4.4560116 |
| C    | 1.9675401  | -1.6245211 | -3.6569814 |

---

|   |            |            |            |
|---|------------|------------|------------|
| H | 1.3336127  | -1.4516190 | -4.5189824 |
| C | 0.7378089  | 1.0926828  | -3.8649973 |
| C | 1.8376263  | 1.4673898  | -4.6352384 |
| H | 2.8342546  | 1.1825727  | -4.3167665 |
| C | 1.6626040  | 2.2171152  | -5.7873589 |
| H | 2.5248735  | 2.5251214  | -6.3673372 |
| C | 0.3844504  | 2.5695138  | -6.1982156 |
| H | 0.2470427  | 3.1521037  | -7.1019335 |
| C | -0.7163532 | 2.1714385  | -5.4528065 |
| H | -1.7178221 | 2.4375027  | -5.7709466 |
| C | -0.5400503 | 1.4436861  | -4.2883195 |
| H | -1.3949471 | 1.1429675  | -3.6975954 |
| C | -1.8076389 | 1.5292430  | 1.4374430  |
| N | -1.1587448 | 1.1943032  | 0.4013040  |
| C | -2.5525996 | 2.8135196  | 1.5095387  |
| C | -1.9864677 | 3.9803181  | 1.0059224  |
| H | -0.9802838 | 3.9524438  | 0.6094353  |
| C | -2.7026884 | 5.1650542  | 1.0117077  |
| H | -2.2485275 | 6.0667310  | 0.6171543  |
| C | -1.8516101 | 0.6612604  | 2.6440345  |
| C | -1.9172134 | -0.7245716 | 2.5206609  |
| H | -1.9819800 | -1.1653114 | 1.5340156  |
| C | -1.8894248 | -1.5354708 | 3.6426295  |
| H | -1.9309209 | -2.6125638 | 3.5330621  |
| C | -1.7810676 | -0.9684847 | 4.9053317  |
| C | -1.7161832 | 0.4108217  | 5.0396804  |
| C | -1.7666979 | 1.2221615  | 3.9169650  |
| H | -1.7172337 | 2.2999955  | 4.0201640  |
| C | -0.8394166 | -2.4592957 | -0.9404780 |
| N | -0.2401536 | -1.6868072 | -0.1336146 |
| C | -0.6174364 | -3.9289088 | -0.9240693 |
| C | -1.6952072 | -4.8084802 | -1.0134252 |
| H | -2.6960630 | -4.4141645 | -1.1498592 |
| C | -1.4940446 | -6.1753279 | -0.9068195 |
| H | -2.3403406 | -6.8508991 | -0.9531055 |
| C | -0.2100344 | -6.6769593 | -0.7446251 |
| H | -0.0519316 | -7.7464974 | -0.6663587 |
| C | 0.8703231  | -5.8077766 | -0.6873475 |
| H | 1.8765540  | -6.1926607 | -0.5675580 |
| C | 0.6667646  | -4.4408225 | -0.7684605 |
| H | 1.5051051  | -3.7595248 | -0.7113700 |
| C | -1.7901470 | -1.9378293 | -1.9581121 |
| C | -1.7933682 | -2.4611425 | -3.2498088 |
| H | -1.1301360 | -3.2836748 | -3.4912806 |
| C | -2.6144006 | -1.9174692 | -4.2253130 |
| H | -2.5893394 | -2.3150190 | -5.2332969 |
| C | -3.4634723 | -0.8653555 | -3.9136544 |
| H | -4.1057420 | -0.4388971 | -4.6755268 |
| C | -3.4837683 | -0.3525939 | -2.6235940 |
| H | -4.1380107 | 0.4755260  | -2.3789596 |
| C | -2.6470312 | -0.8821958 | -1.6557850 |
| H | -2.6472930 | -0.4713291 | -0.6542638 |
| C | 1.7285957  | 0.5636990  | 2.0933820  |
| N | 1.1245843  | -0.2001522 | 1.2817675  |
| C | 2.4421540  | 0.0302731  | 3.2831830  |
| C | 1.8711545  | -0.9838781 | 4.0454177  |
| H | 0.8818278  | -1.3421245 | 3.7941496  |

---

|    |            |            |            |
|----|------------|------------|------------|
| C  | 2.5616135  | -1.5298352 | 5.1139627  |
| C  | 3.8370520  | -1.0781063 | 5.4223957  |
| C  | 4.4113754  | -0.0612766 | 4.6721503  |
| H  | 5.4067494  | 0.2952625  | 4.9106185  |
| C  | 3.7104513  | 0.5022011  | 3.6179629  |
| H  | 4.1528770  | 1.3029200  | 3.0358215  |
| C  | 1.7477777  | 2.0388464  | 1.9067241  |
| C  | 1.8546734  | 2.5932029  | 0.6334828  |
| H  | 1.9705640  | 1.9383181  | -0.2207010 |
| C  | 1.8030798  | 3.9651747  | 0.4542653  |
| H  | 1.8777241  | 4.3842484  | -0.5420494 |
| C  | 1.6288840  | 4.8013794  | 1.5488305  |
| H  | 1.5703555  | 5.8742415  | 1.4060779  |
| C  | 1.5224444  | 4.2596948  | 2.8216194  |
| H  | 1.3782482  | 4.9083746  | 3.6778221  |
| C  | 1.5970769  | 2.8873743  | 3.0018882  |
| H  | 1.5150888  | 2.4623666  | 3.9956006  |
| C  | 1.8677171  | -4.0282770 | 2.4305308  |
| N  | 1.4042747  | -3.0351298 | 1.8374925  |
| C  | 1.0225374  | -4.8332266 | 3.3632766  |
| C  | -0.3266913 | -5.0069898 | 3.0650964  |
| H  | -0.7037795 | -4.5967646 | 2.1348605  |
| C  | 1.5288399  | -5.3639417 | 4.5461216  |
| H  | 2.5802116  | -5.2378755 | 4.7800214  |
| C  | 3.2864256  | -4.4528773 | 2.2313161  |
| C  | 4.2613633  | -3.4741613 | 2.0551903  |
| H  | 3.9634266  | -2.4339180 | 2.1254295  |
| Be | -0.8553103 | 1.8241240  | -1.1035925 |
| Be | 0.0027518  | 0.0020273  | 0.0050558  |
| Be | 0.8521243  | -1.8277137 | 1.1071930  |
| H  | -1.7413681 | -1.6042303 | 5.7822863  |
| H  | -1.6236230 | 0.8571396  | 6.0230020  |
| H  | 2.1041622  | -2.3190360 | 5.6995677  |
| H  | 4.3833652  | -1.5158270 | 6.2500215  |
| C  | 1.1372756  | 6.1609586  | -3.0550219 |
| H  | 2.1913191  | 6.0217081  | -3.2685721 |
| C  | 0.6155672  | 7.4435016  | -2.9358699 |
| H  | 1.2623926  | 8.3064753  | -3.0459103 |
| H  | -1.1487679 | 8.6149708  | -2.5891640 |
| C  | -0.7374872 | 7.6162994  | -2.6841405 |
| C  | -1.5680083 | 6.5118533  | -2.5584931 |
| H  | -2.6275855 | 6.6460544  | -2.3706594 |
| C  | 5.5762234  | -3.8286875 | 1.8076257  |
| H  | 6.3309570  | -3.0589139 | 1.6901422  |
| C  | 5.9297826  | -5.1692869 | 1.7124632  |
| H  | 6.9578034  | -5.4479280 | 1.5106279  |
| C  | 4.9645255  | -6.1504092 | 1.8849380  |
| H  | 5.2354998  | -7.1975471 | 1.8101759  |
| C  | 3.6516307  | -5.7939377 | 2.1580746  |
| H  | 2.8979496  | -6.5603519 | 2.3014864  |

**Table S44:** Coordinates of the optimized structure of H<sub>2</sub>NMes in XZY Ångstrom format.

| atom | x          | y         | z          |
|------|------------|-----------|------------|
| C    | -0.5907469 | 1.0547203 | -0.4155425 |
| C    | 0.3766500  | 0.2368890 | -1.0130539 |
| C    | -1.0582943 | 0.7295858 | 0.8496911  |

|   |            |            |            |
|---|------------|------------|------------|
| H | -1.8057463 | 1.3730238  | 1.3056959  |
| C | -0.6048695 | -0.3833226 | 1.5459439  |
| C | 0.3536939  | -1.1770327 | 0.9290761  |
| H | 0.7316961  | -2.0534797 | 1.4482878  |
| C | 0.8513721  | -0.8927168 | -0.3343434 |
| C | -1.1050992 | 2.2577167  | -1.1419006 |
| H | -0.3091895 | 2.9853153  | -1.3437688 |
| H | -1.5463918 | 1.9863470  | -2.1067299 |
| H | -1.8691474 | 2.7686584  | -0.5559234 |
| C | 1.8793557  | -1.7723114 | -0.9737848 |
| H | 2.1234667  | -2.6170451 | -0.3295420 |
| H | 1.5283351  | -2.1701272 | -1.9317938 |
| N | 0.8215276  | 0.5128223  | -2.3018392 |
| H | 0.7343076  | 1.4739370  | -2.5879695 |
| H | 1.7242978  | 0.1326518  | -2.5335681 |
| C | -1.1515818 | -0.7322335 | 2.8973758  |
| H | -0.4047947 | -1.2433529 | 3.5085906  |
| H | -1.4750385 | 0.1599703  | 3.4374588  |
| H | -2.0178559 | -1.3971951 | 2.8185721  |
| H | 2.8140534  | -1.2328206 | -1.1709323 |

**Table S45:** Coordinates of the optimized structure of pyridine in XYZ Ångstrom format.

| atom | x          | y         | z          |
|------|------------|-----------|------------|
| C    | 0.0000000  | 0.0000000 | -1.1875644 |
| C    | -1.1905597 | 0.0000000 | -0.4796224 |
| C    | -1.1347786 | 0.0000000 | 0.9066676  |
| N    | 0.0000000  | 0.0000000 | 1.5975498  |
| C    | 1.1347786  | 0.0000000 | 0.9066676  |
| C    | 1.1905597  | 0.0000000 | -0.4796224 |
| H    | 0.0000000  | 0.0000000 | -2.2716173 |
| H    | -2.1474043 | 0.0000000 | -0.9875080 |
| H    | -2.0507421 | 0.0000000 | 1.4912789  |
| H    | 2.0507421  | 0.0000000 | 1.4912789  |
| H    | 2.1474043  | 0.0000000 | -0.9875080 |

**Table S46:** Coordinates of the optimized structure of H<sub>2</sub>NDipp in XYZ Ångstrom format.

| atom | x          | y          | z          |
|------|------------|------------|------------|
| C    | 0.0881083  | -0.9773903 | -0.7861065 |
| C    | 0.3459025  | 0.1459708  | 0.0200729  |
| C    | -1.2110925 | -1.4580539 | -0.8634735 |
| H    | -1.4197823 | -2.3257524 | -1.4772671 |
| C    | -2.2458794 | -0.8568352 | -0.1682254 |
| H    | -3.2545111 | -1.2450203 | -0.2427437 |
| C    | -1.9773836 | 0.2444834  | 0.6258016  |
| H    | -2.7884245 | 0.7134220  | 1.1688202  |
| C    | -0.6941281 | 0.7614620  | 0.7414439  |
| C    | -0.3955073 | 1.9357020  | 1.6461969  |
| H    | 0.2964177  | 2.6032484  | 1.1112639  |
| C    | -1.6126266 | 2.7832153  | 1.9855154  |
| H    | -2.3164078 | 2.2370404  | 2.6185819  |
| H    | -1.3040060 | 3.6726083  | 2.5395596  |
| H    | -2.1431036 | 3.1068614  | 1.0876024  |
| C    | 0.2965305  | 1.4692161  | 2.9289538  |
| H    | 1.1812485  | 0.8669963  | 2.7163048  |

|   |            |            |            |
|---|------------|------------|------------|
| H | 0.5969118  | 2.3220331  | 3.5438276  |
| H | -0.3909288 | 0.8539346  | 3.5150920  |
| C | 1.2161644  | -1.6177494 | -1.5630695 |
| H | 2.1116689  | -1.5731358 | -0.9305088 |
| C | 1.4985833  | -0.8416824 | -2.8523253 |
| H | 1.6599015  | 0.2241242  | -2.6711623 |
| H | 2.3790664  | -1.2372158 | -3.3658690 |
| H | 0.6444244  | -0.9239982 | -3.5292698 |
| C | 0.9881685  | -3.0881508 | -1.8828034 |
| H | 0.1761943  | -3.2237197 | -2.6016258 |
| H | 1.8882927  | -3.5175928 | -2.3287589 |
| H | 0.7457091  | -3.6595518 | -0.9847129 |
| N | 1.6518257  | 0.6098150  | 0.1511407  |
| H | 1.7384529  | 1.5543739  | 0.4868238  |
| H | 2.2502103  | 0.4413417  | -0.6390796 |

**Table S47:** Coordinates of the optimized structure of HNP<sub>h</sub> in XYZ Ångstrom format.

| atom | x          | y          | z          |
|------|------------|------------|------------|
| N    | 0.9542560  | 0.2406909  | 0.4468964  |
| H    | 1.8498823  | 0.4444667  | 0.8545442  |
| C    | 0.0800640  | -0.4723655 | 1.2526772  |
| C    | -0.9399440 | -1.2752307 | 0.7379673  |
| H    | -1.0719572 | -1.3589247 | -0.3325314 |
| C    | -1.7604335 | -1.9912633 | 1.5935265  |
| H    | -2.5445687 | -2.6107147 | 1.1728827  |
| C    | -1.5811212 | -1.9399436 | 2.9678173  |
| H    | -2.2264311 | -2.5049774 | 3.6288818  |
| C    | -0.5560796 | -1.1579855 | 3.4810763  |
| H    | -0.3948666 | -1.1063167 | 4.5518335  |
| C    | 0.2601299  | -0.4266580 | 2.6377939  |
| H    | 1.0474009  | 0.1970155  | 3.0492356  |
| C    | 0.7733426  | 0.6891135  | -0.8523816 |
| C    | -0.4868778 | 0.9607685  | -1.3891777 |
| H    | -1.3721166 | 0.8215303  | -0.7829917 |
| C    | -0.6032845 | 1.4402240  | -2.6830965 |
| H    | -1.5909453 | 1.6469606  | -3.0796826 |
| C    | 0.5190792  | 1.6740713  | -3.4637197 |
| H    | 0.4183659  | 2.0509774  | -4.4739186 |
| C    | 1.7735411  | 1.4241369  | -2.9259175 |
| H    | 2.6645980  | 1.6038537  | -3.5165872 |
| C    | 1.9017712  | 0.9306927  | -1.6403826 |
| H    | 2.8861953  | 0.7198782  | -1.2347458 |

**Table S48:** Coordinates of the optimized structure of HNCPh<sub>2</sub> in XYZ Ångstrom format.

| atom | x          | y          | z          |
|------|------------|------------|------------|
| C    | -0.3460482 | 1.1425810  | -0.3318600 |
| C    | -0.8695221 | -0.0782710 | -1.0002754 |
| C    | -0.0126217 | -1.1016142 | -1.4004629 |
| C    | -0.5035741 | -2.1989362 | -2.0891626 |
| C    | -1.8596528 | -2.2992547 | -2.3653206 |
| C    | -2.7224333 | -1.2926984 | -1.9566577 |
| C    | -2.2289495 | -0.1864429 | -1.2842291 |
| N    | -0.6880315 | 2.3199197  | -0.6796658 |
| H    | -1.3266308 | 2.2836943  | -1.4733718 |



---

|   |            |            |            |
|---|------------|------------|------------|
| H | 0.1754078  | -2.9801788 | -2.4105240 |
| H | -2.2441636 | -3.1630920 | -2.8948557 |
| H | -3.7843565 | -1.3713981 | -2.1584391 |
| H | -2.9036364 | 0.5964690  | -0.9552143 |
| C | 0.6212357  | 0.9825879  | 0.7798567  |
| C | 0.6633571  | -0.1793211 | 1.5474171  |
| H | -0.0118264 | -0.9963132 | 1.3227543  |
| C | 1.5506322  | -0.2898310 | 2.6070614  |
| C | 2.4126712  | 0.7546004  | 2.9027656  |
| C | 2.3781167  | 1.9159125  | 2.1407118  |
| C | 1.4859899  | 2.0314303  | 1.0905474  |
| H | 1.0460232  | -1.0266468 | -1.1806773 |
| H | 1.5672275  | -1.1947143 | 3.2032956  |
| H | 3.1119317  | 0.6653754  | 3.7262323  |
| H | 3.0519763  | 2.7338077  | 2.3683552  |
| H | 1.4368777  | 2.9323342  | 0.4917189  |

---
